# Supplementary material for: Age-related DNA methylation changes are sex-specific: a comprehensive assessment
Source: Aging (Albany NY). 2020 Dec 3;12(23):24057–80. doi: 10.18632/aging.202251 (PMC7762479; doi:10.18632/aging.202251)
Supplement: Supplementary File 1 [file aging-12-202251-s003.xlsx]

## Sheet: saDMPs
CpG probe	CHR	MAPINFO	UCSC_REFGENE_NAME	RELATION_TO_UCSC_CPG_ISLAND	Direction sex	Bonferroni corrected p-value sex	Direction age	Bonferroni corrected p-value age	sDMP in Inoshita et al., 2015	sDMP in Singmann et al., 2015	sDMP in Yousefi et al., 2015	age-by-sex interaction in McCartnery et al., 2020 (Table S4)	Significant sex-age interaction (Supplementary File 3)
cg01620164	2	164590272	FIGN	N_Shelf	----	0	----	1.12144e-143				1
cg03890691	16	30023615	DOC2A	S_Shore	----	0	++++	2.18385e-100	1
cg23626733	1	2345398	PEX10;PEX10	N_Shore	----	0	----	1.27883e-81			1
cg23928726	1	2344998	PEX10;PEX10	N_Shore	----	0	----	3.70205e-76	1		1
cg27615582	12	11002411	PRR4;PRR4		----	0	----	2.53766e-56	1
cg17077610	10	22766143		Island	----	0	++++	1.91792e-55	1		1
cg24613050	10	81743128		Island	----	0	++++	1.43852e-54	1		1
cg05928806	7	127991614	PRRT4	Island	----	0	++++	1.17652e-52	1
cg16374663	15	41805031	LTK;LTK;LTK	Island	----	0	++++	2.24517e-45	1		1
cg10739556	7	27192056		S_Shore	----	0	++++	4.56772e-44	1		1
cg21784396	7	127991421	PRRT4	Island	----	0	++++	8.41732e-40	1		1
cg22953960	10	22766081		Island	----	0	++++	2.84392e-33	1		1
cg05812269	18	21033260	RIOK3;RIOK3	Island	----	0	++++	9.73878e-33			1
cg08035323	2	9843525			----	0	----	2.19106e-29	1
cg09639931	17	38024394	ZPBP2;ZPBP2	Island	----	0	++++	1.26178e-24	1		1
cg20432211	4	77342104		Island	----	0	++++	3.40693e-23	1		1
cg09067967	4	39529342	UGDH	Island	----	0	++++	1.97038e-19	1	1	1
cg19881928	17	62039009	SCN4A		----	0	++++	5.61701e-18	1		1
cg00167275	10	88854588	FAM35A;GLUD1;GLUD1	Island	----	0	++++	2.06974e-17
cg19544707	14	103746266		Island	----	0	++++	3.36103e-16	1	1	1
cg20111643	17	52977892	TOM1L1	Island	----	0	++++	1.65559e-14		1	1
cg12614789	15	76638473		Island	----	0	++++	2.75342e-13	1	1
cg03405128	4	77341841		N_Shore	----	0	++++	3.30528e-13	1		1
cg26516287	7	12629275	SCIN;SCIN		----	0	----	1.03323e-11	1
cg11092486	6	5087604		S_Shore	----	0	++++	3.98405e-11	1		1
cg21144120	6	28661199			----	0	++++	7.02373e-11	1		1
cg06644124	1	200379083	ZNF281;ZNF281	Island	----	0	++++	1.12144e-10	1		1
cg23250574	6	28661310			----	0	++++	2.40748e-09	1		1
cg11574745	6	5087031	PPP1R3G;PPP1R3G	Island	----	0	++++	6.73845e-08	1		1
cg25742246	1	214153460		Island	----	0	++++	4.6792e-06	1	1	1
cg07128102	16	84221332	TAF1C;TAF1C	S_Shore	++++	0	----	4.70216e-06
cg12740757	2	30144623	ALK	Island	----	0	++++	8.76818e-06			1
cg04829993	10	71561459	COL13A1;COL13A1;COL13A1;COL13A1;COL13A1;COL13A1;COL13A1;COL13A1;COL13A1;COL13A1;COL13A1;COL13A1;COL13A1;COL13A1;COL13A1;COL13A1;COL13A1;COL13A1;COL13A1;COL13A1	Island	----	0	++++	1.03684e-05	1		1
cg10563109	6	5087749		S_Shore	----	0	++++	1.50967e-05	1		1
cg21535947	13	25875133	NUPL1;NUPL1	Island	----	0	++++	1.95038e-05	1		1
cg24920126	6	5087266	PPP1R3G;PPP1R3G	S_Shore	----	0	++++	7.05979e-05			1
cg19937979	14	70039915		Island	----	0	++++	9.21085e-05			1
cg17292758	19	49636594	PPFIA3	Island	----	0	++++	0.000382337	1		1
cg04580344	6	127797022	C6orf174	Island	----	3.8037e-299	++++	2.11105e-22	1		1
cg14079463	6	127796989	C6orf174	Island	----	8.88623e-298	++++	2.1527e-19	1		1
cg15081844	3	133117569	BFSP2		++++	2.44617e-294	----	1.86971e-12	1
cg20390711	6	127796683	C6orf174	Island	----	3.31184e-287	++++	3.35119e-15			1
cg17076667	10	121418050	BAG3		----	1.00011e-284	----	1.31523e-21	1			1
cg10776186	13	25875020	NUPL1;NUPL1	Island	----	7.2467e-281	++++	1.09619e-22	1	1	1
cg02093808	4	77342011		Island	----	8.75506e-281	++++	1.38573e-06	1		1
cg20823695	1	2345410	PEX10;PEX10	N_Shore	----	6.95159e-278	----	9.24692e-119	1		1
cg04891961	17	27939900	ANKRD13B	Island	----	1.69199e-271	++++	5.18418e-58	1
cg25362652	6	106429769		Island	----	3.31184e-271	++++	2.95705e-30			1
cg27053299	13	100548780	CLYBL	Island	----	1.46246e-267	++++	1.3795e-10	1		1
cg20816361	1	2467100		Island	++++	3.83649e-267	----	0.000340037	1	1	1
cg08415582	8	57030523		Island	----	1.08209e-264	++++	9.30922e-18			1
cg23256579	12	11002403	PRR4;PRR4		----	3.41021e-264	----	6.03345e-101	1			1
cg02917321	22	38215204		S_Shore	----	2.55766e-263	++++	3.23577e-30			1
cg08532057	13	25875436	NUPL1;NUPL1	Island	----	4.68904e-261	++++	0.00107881	1		1
cg16428357	20	34190258	FER1L4	Island	----	7.96809e-258	++++	1.7297e-15	1		1
cg13598010	7	72838776		Island	----	1.44278e-253	++++	1.05389e-27	1
cg22713900	15	41803592	LTK;LTK;LTK	Island	----	6.78763e-253	++++	7.58444e-45			1
cg27151362	16	30023515	DOC2A	S_Shore	----	1.33785e-251	++++	2.62652e-105
cg04720592	1	118165724	FAM46C		----	1.3772e-246	----	8.52225e-09	1
cg23629166	1	2345368	PEX10;PEX10	N_Shore	----	1.85266e-245	----	1.12471e-93			1
cg22584138	17	28562220	SLC6A4	N_Shore	----	2.8167e-245	++++	2.3701e-18			1
cg00360794	15	41803850	LTK;LTK;LTK	Island	----	3.47579e-241	++++	1.24276e-22	1
cg23261715	12	54144380		N_Shore	----	4.45951e-240	----	2.50913e-13	1		1
cg26533311	6	27206911			----	1.20013e-238	++++	9.68631e-06			1
cg13839439	12	54144521		N_Shore	----	2.17729e-236	----	2.01432e-27	1		1
cg20136951	1	2345400	PEX10;PEX10	N_Shore	----	4.19718e-234	----	2.51503e-84	1		1
cg03785076	2	241936915	SNED1	N_Shore	----	6.68926e-231	----	2.61209e-51
cg19206146	6	28661759			----	2.4888e-230	++++	3.20101e-52
cg07433923	6	147827800		N_Shore	----	4.55788e-230	----	1.76478e-06			1
cg13163521	15	41803428	LTK;LTK;LTK	N_Shore	----	7.18112e-229	++++	1.49787e-38
cg14266237	19	12995624	KLF1	N_Shore	----	3.54137e-225	++++	1.38507e-17			1
cg06972969	10	60935663	PHYHIPL	N_Shore	----	3.26921e-224	++++	6.52531e-27
cg16440561	2	220312854	SPEG	Island	----	2.68226e-217	++++	1.01683e-18	1		1
cg09899665	13	76123907	UCHL3	Island	----	3.16428e-217	++++	1.06897e-06
cg04603391	19	31844056		Island	----	4.09881e-217	++++	4.95792e-11	1	1
cg17375267	19	46915776	CCDC8	Island	----	1.9871e-216	++++	0.0002799
cg12210255	7	72838671		Island	----	1.26243e-215	++++	6.98766e-21	1		1
cg18390181	10	102810139		Island	----	5.73834e-215	++++	0.00569243			1
cg21811204	5	132158625	SHROOM1	Island	----	3.19052e-214	++++	4.7743e-52			1
cg02282631	5	42953543		S_Shore	----	5.83671e-214	++++	7.11226e-31			1
cg01530154	6	28661712			----	3.14789e-213	++++	2.68357e-17	1		1
cg21587238	5	42953590		S_Shore	----	9.50925e-213	++++	8.15828e-17			1
cg06710937	13	23489940		Island	----	4.55788e-212	++++	1.17095e-18	1	1	1
cg24439334	1	2345374	PEX10;PEX10	N_Shore	----	1.14767e-211	----	1.02405e-57			1
cg08369368	5	176559881	NSD1;NSD1	Island	----	5.80392e-211	++++	9.52564e-71		1
cg03531326	19	39443344	FBXO17;FBXO17	S_Shelf	----	1.42639e-210	----	2.73178e-08			1
cg00002028	1	20960010	PINK1;PINK1	N_Shore	----	4.4923e-209	++++	0.000283376
cg21791017	15	41803772	LTK;LTK;LTK	Island	----	2.6134e-208	++++	2.23008e-75
cg24789467	5	132159003	SHROOM1	Island	----	2.63964e-208	++++	1.01159e-77	1		1
cg11660018	11	86510915	PRSS23	N_Shore	----	2.87245e-207	----	6.90896e-18	1
cg02891686	4	24801425	SOD3	Island	----	4.19718e-207	++++	2.35108e-122			1
cg04889069	8	57030408		Island	----	2.0035e-206	++++	4.80381e-14	1		1
cg05301470	6	28558006		S_Shelf	----	8.296e-206	++++	2.95049e-48
cg11206167	5	42924367		Island	----	2.58717e-205	++++	0.00131523			1
cg21304158	2	241937034	SNED1	N_Shore	----	3.20363e-205	----	5.43011e-29	1
cg19214300	16	56709503	MT1IP	N_Shore	----	6.16461e-203	++++	4.9612e-31		1
cg12180613	5	132158560	SHROOM1	Island	----	6.45973e-203	++++	6.2761e-23	1		1
cg12862851	18	74203132		N_Shore	----	1.03618e-202	++++	0.000328889			1
cg13306335	1	2345376	PEX10;PEX10	N_Shore	----	1.93136e-200	----	8.6239e-91
cg05056638	8	24800824		S_Shore	----	7.14833e-200	++++	2.62586e-28
cg07469926	5	114514717	TRIM36;TRIM36;TRIM36	Island	----	7.6074e-200	++++	2.54946e-33			1
cg04628369	20	56247426	PMEPA1;PMEPA1;PMEPA1;PMEPA1	Island	++++	1.90185e-199	++++	6.87945e-15
cg20893579	22	38215064		Island	----	6.49252e-199	++++	3.36431e-61
cg10766585	4	24801110	SOD3	Island	----	4.03323e-197	++++	8.34518e-06		1	1
cg26619043	17	66287492	ARSG;SLC16A6	Island	----	5.01695e-197	++++	4.42672e-09		1	1
cg01343041	2	24397787	C2orf84	Island	----	1.12144e-196	++++	1.87168e-12	1		1
cg06119452	6	169621662	THBS2	N_Shore	----	3.57416e-196	----	4.82348e-21
cg16913064	17	45949878		Island	----	1.28867e-194	++++	1.70675e-05			1
cg18587476	2	24397810	C2orf84	Island	----	1.80676e-193	++++	7.39098e-24			1
cg00695391	1	2525548	MMEL1	N_Shore	----	5.31206e-193	----	3.13805e-118
cg09469355	1	2161886	SKI	S_Shore	----	6.65647e-193	----	1.5946e-30
cg07218647	2	121338498		S_Shelf	----	7.80414e-193	++++	0.000115062	1
cg00234616	2	74740572	TLX2	Island	----	2.2068e-192	++++	4.49886e-37	1		1
cg06877024	6	28743586			++++	2.78391e-192	++++	1.13816e-55	1	1	1
cg15364537	1	205538310	MFSD4	Island	----	5.21369e-192	++++	1.4054e-05			1
cg18402261	17	48021977			----	8.16483e-192	++++	1.61329e-11	1	1	1
cg09578319	17	4900256	INCA1;INCA1;INCA1;KIF1C;INCA1	N_Shore	----	1.72478e-191	++++	7.24998e-05			1
cg15820868	2	133105045			----	1.69199e-190	++++	2.33239e-14
cg14912575	14	70038236	C14orf162	Island	----	1.24604e-188	++++	4.19718e-09	1		1
cg07187808	1	160054321	KCNJ9	Island	----	2.22647e-188	++++	0.000396437		1	1
cg17277199	2	24397845	C2orf84	Island	----	5.93508e-188	++++	1.64084e-19	1		1
cg12614687	5	76926752	OTP	Island	----	6.82042e-188	++++	1.24374e-22	1		1
cg07546943	2	236523362	AGAP1;AGAP1		----	9.50925e-188	----	0.00476446
cg19747604	19	46915570	CCDC8	Island	----	3.14461e-187	++++	0.00116177			1
cg01540595	1	75590960		Island	----	1.95431e-186	++++	0.0036627			1
cg23718606	6	27219812	PRSS16	Island	++++	6.23019e-186	++++	8.57472e-23
cg17852385	15	75019188	CYP1A1	Island	----	1.70839e-185	++++	2.39141e-15			1
cg02258201	9	35906148	HRCT1		----	5.57439e-185	----	3.86928e-139
cg14389669	9	136399386	ADAMTSL2;ADAMTSL2	Island	----	9.05018e-184	----	4.14472e-53	1		1
cg26787381	20	25128777	LOC284798;LOC284798;LOC284798	Island	----	1.69199e-183	++++	8.74523e-25		1	1
cg02179982	22	46365647	WNT7B	N_Shore	----	2.93475e-183	----	1.29818e-07		1	1
cg24398479	7	27192061		S_Shore	----	3.34463e-183	++++	1.01749e-30	1		1
cg23149300	10	36958940			++++	6.23019e-183	----	1.65592e-148		1
cg08142858	1	2718742		S_Shore	++++	1.14767e-182	----	5.43339e-23			1
cg02162897	2	38300537	CYP1B1	N_Shore	----	8.19762e-181	++++	1.40114e-05			1
cg26345105	1	228634265		S_Shore	----	8.85343e-181	++++	4.19718e-122
cg26612727	17	38024636	ZPBP2;ZPBP2	Island	----	2.89868e-178	++++	4.32179e-72			1
cg16879052	1	160054270	KCNJ9	Island	----	1.23948e-177	++++	0.00020858	1	1	1
cg14523238	9	101192792	GABBR2		++++	4.85299e-177	----	2.12023e-42			1
cg00186462	3	100401284	GPR128		----	7.11554e-177	++++	1.04438e-12			1
cg24933709	7	149120687		S_Shore	----	4.88578e-176	++++	1.93759e-25	1		1
cg27475169	11	119190850		N_Shore	----	1.27555e-175	----	1.23128e-22	1
cg14515364	2	636606		Island	----	1.60673e-175	++++	8.48946e-23			1
cg00049595	6	41650636		N_Shore	----	2.59701e-174	----	8.68292e-27			1
cg15548859	1	2381299			++++	7.37786e-173	----	8.48618e-05		1	1
cg00441709	17	2528280	PAFAH1B1		++++	1.14439e-172	----	1.7379e-33		1
cg01066472	1	75591029		Island	----	2.53143e-172	++++	0.00420046			1
cg19940077	1	200842282	GPR25	Island	----	4.75462e-172	++++	1.74937e-34			1
cg20665157	7	121969421	CADPS2;CADPS2;CADPS2		----	1.69527e-171	++++	2.85277e-131		1
cg26833936	1	91303028		S_Shore	----	2.03629e-171	++++	1.15849e-24			1
cg11562153	6	28493500	GPX5;GPX5		++++	5.27927e-171	----	3.86928e-52		1
cg00387658	20	54986793	CASS4;CASS4;CASS4;CASS4		----	2.21008e-170	----	1.20997e-205
cg26469379	16	33935427		N_Shore	----	5.27927e-170	++++	2.36223e-09
cg20073313	8	52322009	PXDNL	Island	----	1.94776e-169	++++	2.1986e-19			1
cg25352397	8	24800883		S_Shore	----	4.1316e-168	++++	1.0811e-22
cg20704654	20	30072118	NCRNA00028;REM1	Island	----	2.07236e-167	++++	8.86655e-80			1
cg02961707	19	7927974	EVI5L;EVI5L	Island	----	3.93486e-167	++++	1.71166e-50		1
cg02297043	1	75590912		Island	----	4.39393e-167	++++	2.42879e-06		1	1
cg07183876	5	80257268	RASGRF2	S_Shore	----	6.26299e-166	++++	1.2385e-08	1		1
cg25423077	18	59221601	CDH20	Island	----	6.42694e-166	++++	6.31873e-05			1
cg07478773	1	40041131	PABPC4;PABPC4;PABPC4	N_Shore	++++	3.23314e-165	----	4.70216e-42
cg26977936	6	28558022		S_Shelf	----	1.09192e-164	++++	3.85944e-08
cg13962347	6	5174647	LYRM4;LYRM4		++++	3.50858e-164	++++	1.67855e-08		1
cg18933331	1	110186418		S_Shore	----	7.50902e-164	----	0
cg06757928	1	2811411			----	9.77157e-163	----	0.00409225
cg15138125	1	157948893		Island	----	1.76413e-162	++++	3.67254e-12	1		1
cg17439660	18	906020	ADCYAP1;ADCYAP1	Island	----	1.85922e-162	++++	7.85988e-09			1
cg11229415	1	2407652	PLCH2	N_Shelf	++++	6.75484e-162	----	2.05137e-42		1
cg02085507	19	6739192	TRIP10	N_Shore	----	2.59045e-161	++++	8.64358e-13			1
cg13544075	9	139644102	LCN6	S_Shelf	----	3.50858e-161	----	1.84151e-57		1
cg25997306	2	133104748			----	4.91858e-161	++++	0.00494481			1
cg09044186	11	116661388	APOA5;APOA5	Island	----	8.45995e-161	++++	0.000892557			1
cg04189591	22	42309398		N_Shore	----	3.31184e-160	----	2.71702e-16
cg13158272	14	74257174		S_Shelf	----	4.09881e-160	----	1.9871e-32
cg13790785	9	68412296		N_Shore	----	6.45973e-160	++++	4.15128e-15
cg04087740	3	71804142	GPR27;EIF4E3;EIF4E3	Island	----	8.45995e-160	++++	6.2761e-27			1
cg18041277	8	57030824		Island	----	1.19357e-159	++++	0.000449558			1
cg06797068	6	74104600	DDX43;DDX43	Island	----	1.39688e-159	++++	0.00837797
cg12443001	1	2467281		S_Shore	++++	1.42311e-159	----	1.71298e-11		1	1
cg16987606	17	72426469	GPRC5C	N_Shore	----	8.75506e-159	----	2.57274e-63	1
cg12934884	6	28558070		S_Shelf	----	2.53471e-158	++++	1.57362e-39
cg05017628	19	48698632		Island	----	2.84294e-158	++++	1.80348e-25			1
cg13711528	19	39138322	ACTN4	Island	----	4.19718e-158	++++	0.00361351			1
cg13026730	3	71804139	GPR27;EIF4E3;EIF4E3	Island	----	6.78763e-158	++++	8.59111e-07			1
cg03358636	3	197474006	KIAA0226	N_Shelf	----	1.79364e-157	----	3.49219e-40		1
cg01945624	4	8230847	SH3TC1		----	4.91858e-157	----	3.65614e-17
cg20481312	15	59157579		Island	----	3.37742e-156	++++	5.76129e-19		1	1
cg23512275	21	45232595	LOC284837		----	1.16406e-154	----	2.45142e-64	1
cg20629587	15	31689706		Island	----	3.37742e-154	++++	2.09794e-06			1
cg06226630	4	48493420	ZAR1	Island	----	4.4923e-154	++++	3.02984e-149
cg04876424	6	17280551	RBM24	N_Shore	----	4.88578e-154	++++	3.48891e-09	1		1
cg21184711	7	122488330	CADPS2;CADPS2;CADPS2		----	5.80392e-153	++++	3.2561e-117	1
cg13985198	1	45242073	SNORD46;RPS8;SNORD38A	S_Shore	++++	7.11554e-153	----	3.6463e-15		1
cg03845837	16	67203406	HSF4;HSF4	N_Shore	----	1.22964e-152	----	9.22397e-13
cg03950599	19	48698419		Island	----	1.37392e-152	++++	1.71757e-26			1
cg06432753	4	146118165			----	2.52487e-152	----	9.8765e-79
cg03618211	4	103941300	NHEDC1;NHEDC1	S_Shore	----	4.39393e-151	----	0.00065745			1
cg01005080	1	75592950	LHX8	S_Shore	----	7.73856e-151	++++	1.13291e-09		1	1
cg14611683	1	45452580	EIF2B3;EIF2B3	S_Shore	----	9.11576e-151	++++	2.51733e-25			1
cg18137414	22	42313943		N_Shore	----	1.64936e-150	----	2.99344e-28			1
cg01530605	3	181414848	SOX2OT	S_Shore	----	2.03629e-150	++++	1.76085e-07	1		1
cg27641532	6	27648317		S_Shore	++++	7.90251e-150	++++	9.83387e-08
cg20153322	12	120703977	PXN;PXN	S_Shore	----	9.34529e-150	----	2.21008e-176
cg04983977	1	200842145	GPR25	N_Shore	----	1.16734e-149	++++	2.39272e-38			1
cg13420413	1	2347015		S_Shore	----	1.24604e-149	----	2.7508e-18
cg11390151	1	2387810		Island	++++	1.66248e-149	----	2.89671e-27		1
cg02931604	6	74064298	DPPA5	Island	----	2.21008e-149	++++	0.000276326	1		1
cg23880736	4	582172		Island	++++	1.05585e-148	++++	3.8037e-12
cg07176692	1	113500329	SLC16A1	S_Shore	++++	1.18374e-148	----	1.1375e-33
cg02725313	20	30071913	REM1	Island	----	3.00689e-148	++++	3.26659e-22
cg24519157	20	54987662	CASS4;CASS4;CASS4;CASS4		----	3.13477e-148	----	4.46607e-20
cg00307066	4	41880465		Island	----	1.26571e-147	++++	5.06285e-18
cg05304393	16	1545405	TELO2	S_Shore	++++	1.37392e-147	----	2.09859e-102	1
cg02047809	14	31343146	COCH;COCH	N_Shore	----	2.86261e-147	++++	0.00334791
cg11632685	20	25128770	LOC284798;LOC284798;LOC284798	Island	----	1.11816e-146	++++	2.21434e-08			1
cg00929523	1	157948875		Island	----	1.26243e-146	++++	5.00055e-07	1		1
cg09796457	15	68571585	FEM1B	S_Shore	++++	1.70183e-146	----	2.57766e-21	1
cg04797061	16	31159920	PRSS36	Island	----	1.71166e-146	++++	0.00224582	1
cg09187505	6	106434429		Island	----	2.42978e-146	++++	2.05793e-11		1
cg19842134	12	54070591	ATP5G2;ATP5G2	N_Shore	----	2.05269e-145	++++	7.80414e-21
cg10409981	8	99984763		Island	----	2.36092e-145	++++	1.36212e-18			1
cg25065723	10	132892405	TCERG1L	N_Shore	++++	3.31184e-145	++++	7.01061e-57			1
cg12077889	1	232703913			++++	6.95159e-145	----	0.00651875
cg18130044	20	21682362		N_Shore	----	7.11554e-145	++++	2.10613e-36	1		1
cg19981796	19	7928066	EVI5L;EVI5L	Island	----	1.07881e-144	++++	2.65439e-74
cg07493858	4	183061830	MGC45800	N_Shore	----	1.34113e-144	++++	1.27686e-29		1	1
cg13161901	18	59221985	CDH20	Island	----	1.91824e-144	++++	5.26615e-11			1
cg22109708	5	132148179	ANKRD43	N_Shore	----	2.18385e-143	++++	1.56968e-06		1	1
cg02323356	2	220313153	SPEG	Island	----	2.4101e-143	++++	6.78763e-97	1		1
cg09071762	6	74064149	DPPA5	Island	----	7.21391e-143	++++	7.7484e-08			1
cg19341652	6	116600143	DSE;TSPYL1	N_Shore	++++	1.15423e-142	----	3.03247e-32		1
cg07225641	3	46618325	LRRC2;TDGF1	Island	----	1.28867e-142	++++	1.83135e-05			1
cg21201109	19	11307090	KANK2	N_Shore	----	5.8695e-142	----	1.34441e-07
cg15676707	6	106434396		Island	----	1.20997e-141	++++	7.168e-08		1
cg00213123	15	75019070	CYP1A1	Island	----	5.11532e-141	++++	1.02798e-25			1
cg17624536	6	106440910		N_Shore	----	3.73812e-140	++++	2.81146e-21		1
cg13916990	9	34048851	UBAP2	Island	----	4.72183e-140	++++	8.09597e-06			1
cg00718036	4	108745325	SGMS2	N_Shore	----	5.57438e-140	----	1.01847e-36			1
cg03363743	17	28562474	SLC6A4	Island	----	1.55755e-138	++++	4.06602e-97
cg12716639	11	119234198	USP2;USP2	N_Shore	----	1.79364e-138	++++	5.11532e-05		1	1
cg18417954	19	55672513	C19orf51	Island	++++	1.95759e-138	++++	1.99793e-33
cg16205352	12	49688176	PRPH	N_Shore	----	3.86928e-138	----	2.47142e-10
cg06636541	17	79374515	BAHCC1	Island	++++	4.72183e-138	----	6.5745e-32
cg16015113	1	36024366	KIAA0319L;NCDN;NCDN;NCDN	S_Shore	++++	5.90229e-138	----	5.14155e-81
cg04478991	3	195943198	OSTalpha		----	7.90251e-138	----	5.89573e-05
cg00269553	8	52321814	PXDNL	Island	----	6.1974e-137	++++	7.29261e-08			1
cg18023674	1	2424003	PLCH2		++++	7.21391e-137	----	1.32605e-07			1
cg25773262	1	156616855	BCAN;BCAN	Island	----	8.00088e-137	++++	3.16428e-167
cg01754713	16	31226334	TRIM72	Island	----	8.9846e-137	++++	7.70905e-41
cg23198623	2	111433128	BUB1	N_Shelf	++++	1.16406e-136	++++	5.00383e-42
cg09214243	15	29968124		S_Shore	----	2.31173e-136	++++	0.00194448
cg25738529	12	49938018	KCNH3		----	2.41338e-136	++++	1.51066e-26
cg22952142	15	68549178			----	6.886e-136	++++	1.64772e-15			1
cg03652339	10	112258641	DUSP5	Island	----	1.81659e-135	----	8.95509e-38
cg02188818	4	141676849	TBC1D9	N_Shore	++++	2.4101e-135	----	1.63952e-102
cg01652244	6	74063982	DPPA5	Island	----	6.36136e-135	++++	0.000706307			1
cg24230340	2	74758080	HTRA2;HTRA2;AUP1	S_Shore	++++	1.62969e-134	----	3.06099e-31
cg10816169	11	66080868		Island	----	2.60029e-134	++++	1.1962e-27
cg04065086	1	151104186	SEMA6C	Island	----	3.96765e-134	++++	5.84983e-23			1
cg03775416	19	19368775	HAPLN4	Island	----	5.11532e-134	++++	1.17783e-06			1
cg13218710	5	132158887	SHROOM1	Island	----	1.07225e-133	++++	4.22997e-180	1
cg05904716	5	179779205	GFPT2	Island	----	2.44289e-133	++++	6.92207e-16
cg20310608	20	25128805	LOC284798;LOC284798;LOC284798	Island	----	3.50858e-133	++++	3.31184e-24		1	1
cg08617160	19	345312	MIER2	Island	----	3.73812e-133	++++	8.5452e-21			1
cg05973262	6	32191895	NOTCH4		----	9.57483e-133	----	2.74391e-08	1
cg00419321	1	75593476	LHX8	N_Shelf	----	1.08209e-132	++++	2.11368e-06		1	1
cg10973146	14	103568471	C14orf73	Island	----	2.34124e-132	++++	2.83671e-16		1	1
cg22133973	6	170789640		S_Shore	----	2.64291e-132	----	1.38376e-114
cg08034070	17	40805868		Island	----	3.161e-132	++++	6.28922e-33
cg17775765	13	95354021		N_Shore	----	3.27905e-132	++++	1.10307e-71			1
cg14617041	5	72415687	TMEM171;TMEM171	Island	----	4.8202e-132	++++	6.83682e-29
cg12765064	17	47968352		Island	----	9.41087e-132	++++	3.77747e-50
cg22677715	2	162284644		Island	----	1.56411e-131	++++	6.31873e-24			1
cg19905587	2	85554135	TGOLN2	Island	++++	1.7215e-131	----	0.00231599
cg27488503	4	2964223	GRK4;GRK4;GRK4;NOP14	N_Shore	++++	2.88228e-131	----	9.6732e-29		1
cg15194935	19	10405955	ICAM5	Island	----	2.97738e-131	++++	1.56345e-20
cg01850245	6	27569094			++++	4.09881e-131	----	4.63986e-17
cg00197058	17	59554672	TBX4		----	9.47645e-131	++++	1.45032e-20			1
cg02726377	4	108745279	SGMS2	N_Shore	----	1.51492e-130	++++	5.28911e-09			1
cg06951627	6	26196580		N_Shore	++++	2.8331e-130	----	3.33151e-08		1
cg07845581	17	56326510	LPO;LPO;LPO	N_Shore	----	2.99377e-130	++++	0.00200645
cg01190024	10	8078357		Island	----	3.54137e-130	++++	2.22549e-59			1
cg24083746	19	45826152	CKM	N_Shore	----	1.62313e-129	----	9.92896e-06		1	1
cg26993102	6	30228245	HLA-L	Island	----	1.68543e-129	++++	3.05411e-23		1	1
cg05901357	2	27529325	TRIM54;TRIM54	Island	----	1.73134e-129	++++	5.4006e-07			1
cg00097357	12	33591336	SYT10	N_Shore	----	3.34463e-129	++++	2.69112e-20			1
cg16937168	2	241936844	SNED1	N_Shore	----	5.31206e-129	----	7.15817e-44
cg26711820	12	81101689	MYF6	N_Shore	----	5.41043e-129	++++	2.53208e-16			1
cg11194698	7	44184840	GCK;GCK;GCK	Island	----	1.3772e-128	++++	7.43361e-07			1
cg03282345	19	49934577	SLC17A7	Island	----	1.70839e-128	++++	2.35633e-10			1
cg23363754	7	29606082	PRR15	Island	++++	3.02328e-128	++++	3.63647e-05		1
cg26958615	6	27206664			----	4.16439e-128	++++	2.04875e-11			1
cg15005526	2	73438142	NOTO	N_Shelf	++++	8.39437e-128	----	6.08264e-20			1
cg19583819	5	139283051	NRG2;NRG2;NRG2;NRG2	N_Shore	----	1.5182e-127	++++	4.93169e-44
cg01031101	6	28227091	NKAPL	Island	----	1.6428e-127	++++	4.01356e-20
cg20909645	8	99985049		Island	----	3.13477e-127	++++	8.296e-46			1
cg01077724	1	75590483		N_Shore	----	5.93508e-127	++++	0.000284425		1	1
cg12627844	2	64245000	VPS54;VPS54	N_Shore	++++	6.75484e-127	----	2.82523e-73
cg19379572	12	42876523	PRICKLE1;PRICKLE1;PRICKLE1;PRICKLE1	N_Shore	----	1.99366e-126	----	0.000779102	1		1
cg01295339	2	74729710	LBX2;LOC151534	Island	----	2.09203e-126	++++	9.01083e-43
cg17236870	4	94122883	GRID2		++++	5.57438e-126	----	7.29261e-60		1
cg13130352	6	29796494	HLA-G	Island	----	6.32857e-126	++++	1.24243e-10
cg10239319	4	6073656	JAKMIP1;JAKMIP1		----	6.52531e-126	++++	7.66642e-05		1
cg02311932	6	17282853	RBM24;RBM24;RBM24	S_Shore	----	7.27949e-126	----	2.12155e-25
cg07003407	21	45232601	LOC284837		----	2.45273e-125	----	9.15511e-68
cg20519121	2	133014640	NCRNA00164;MIR663B	Island	----	2.9577e-125	++++	0.000241076
cg04098052	7	24517414			----	4.16439e-125	----	3.96765e-109		1
cg13185177	3	194119885	GP5	S_Shore	++++	6.49252e-125	----	1.21489e-57
cg12873476	8	142402728		S_Shore	----	8.88623e-125	----	1.45262e-129
cg12675848	9	125109120		Island	----	1.01323e-124	++++	6.81387e-30	1		1
cg18721420	19	15121913	CCDC105	Island	----	1.65264e-124	++++	1.91497e-141			1
cg14224937	19	52873101	ZNF880	Island	----	1.70183e-124	++++	3.33479e-11			1
cg23791682	2	74740580	TLX2	Island	----	1.84283e-124	++++	5.15467e-31	1
cg05886811	6	17280740	RBM24	Island	----	2.35764e-124	++++	0.000171724			1
cg06817772	12	50678007	LIMA1;LIMA1		++++	2.80359e-124	----	3.85288e-36
cg20305005	2	166151648	SCN2A;SCN2A;SCN2A		++++	6.49252e-124	----	5.15467e-17
cg14132888	5	114514899	TRIM36;TRIM36;TRIM36	Island	----	1.36081e-123	++++	2.49667e-47
cg18500300	7	45128199	NACAD	Island	----	1.38376e-123	++++	6.18757e-34
cg08331981	19	19626599	NDUFA13;TSSK6	Island	----	1.84611e-123	++++	0.000309575		1	1
cg02876326	19	46995757	PNMAL2;PNMAL2	N_Shore	----	2.1445e-123	++++	5.03006e-06		1
cg17286244	15	69222592	MIR548H4;SPESP1;NOX5	Island	----	2.2691e-123	++++	5.83671e-07
cg13942826	12	11002609	PRR4;PRR4		----	3.00361e-123	----	1.14209e-73
cg02154074	2	74756234	HTRA2;HTRA2;AUP1	Island	++++	3.37742e-123	++++	1.26407e-10
cg26819718	10	77872170	C10orf11	Island	----	4.22997e-123	----	5.15795e-11	1
cg07457944	18	67957061	SOCS6	Island	----	7.27949e-123	++++	8.92557e-15		1	1
cg01595366	14	103605032		Island	----	1.42967e-122	++++	4.57427e-23			1
cg01993818	14	34270437	NPAS3;NPAS3;NPAS3;NPAS3	Island	----	5.34485e-122	++++	9.64041e-05		1
cg18517222	11	113660756		Island	----	6.00066e-122	++++	0.00231239			1
cg27553457	19	45899615	PPP1R13L;PPP1R13L	Island	----	6.06624e-122	++++	1.52738e-78
cg08151623	16	3242737		Island	++++	7.73856e-122	++++	1.84512e-10			1
cg11429111	5	134813329			----	2.10515e-121	----	4.43e-09			1
cg01401534	6	4079342	C6orf201;C6orf146;C6orf146	Island	----	3.50858e-121	++++	1.94349e-32
cg05767720	6	32117281	PRRT1	N_Shore	----	7.67298e-121	++++	8.08614e-30			1
cg01952185	5	134813213			----	1.07225e-120	----	1.31982e-06			1
cg16345647	21	38378406	DSCR6	Island	----	1.6592e-120	++++	2.88884e-132
cg00989365	14	70014548		Island	----	2.0658e-120	++++	7.92874e-49
cg18806997	1	45242078	SNORD46;RPS8;SNORD38A	S_Shore	++++	2.63308e-120	----	0.00313707
cg03357547	19	51165207	SHANK1	N_Shore	----	3.14133e-120	++++	1.04438e-08			1
cg09107315	1	78511488	GIPC2	N_Shore	----	3.24954e-120	++++	2.3278e-18	1		1
cg18473521	12	54448265	HOXC4;HOXC4	S_Shore	++++	4.09881e-120	++++	0			1
cg04274288	6	27648004		Island	++++	6.13182e-120	++++	3.68893e-05
cg19149691	11	75140541	KLHL35	N_Shore	----	8.75506e-120	++++	1.79889e-07			1
cg14741228	12	31476479	FAM60A;FAM60A;FLJ13224;FAM60A	N_Shore	++++	1.17718e-119	----	1.37097e-09		1
cg10381888	6	30228243	HLA-L	Island	----	1.4395e-119	++++	3.08723e-22		1
cg01507019	16	56703257	MT1G;MT1H	N_Shore	----	1.65264e-119	++++	1.05749e-05
cg16269733	1	156616804	BCAN;BCAN	Island	----	3.67254e-119	++++	4.59067e-118
cg22904096	2	211180386	MYL1		++++	8.68948e-119	----	4.96776e-24			1
cg09639964	17	909300	ABR;ABR;ABR	N_Shore	----	1.16406e-118	----	2.0458e-19
cg00058009	4	122853693	TRPC3;TRPC3	Island	----	3.93486e-118	++++	2.81375e-06			1
cg15006681	22	38199759	H1F0	N_Shore	----	4.85299e-118	----	1.09389e-10
cg26681770	20	56247302	PMEPA1;PMEPA1;PMEPA1;PMEPA1	Island	++++	5.21369e-118	++++	2.00875e-49
cg04474085	4	77342550		Island	----	5.54159e-118	++++	3.47907e-25	1		1
cg05674437	3	196694153	PIGZ	Island	----	5.80392e-118	++++	4.45623e-06			1
cg00667789	1	59042065	TACSTD2	Island	----	7.70577e-118	++++	4.49558e-32			1
cg02235659	3	45066580	CLEC3B		----	7.77135e-118	----	2.44814e-18		1
cg18675097	6	28227127	NKAPL;NKAPL	Island	----	2.48552e-117	++++	2.85277e-94
cg14654363	6	28601443		N_Shore	----	2.78063e-117	++++	7.15817e-06			1
cg10249828	1	75594261	LHX8;LHX8	N_Shore	----	5.08253e-117	++++	1.46475e-24			1
cg21820656	15	59157075		Island	----	6.13182e-117	++++	4.4923e-35			1
cg22379213	12	49688844	PRPH	N_Shore	----	9.60762e-117	++++	4.84971e-29
cg15065854	19	861829	CFD	Island	++++	1.05258e-116	++++	6.41382e-14
cg19433091	15	43426498	TMEM62	S_Shore	++++	1.08537e-116	----	4.19718e-156		1
cg01605783	21	45232587	LOC284837		----	1.56739e-116	----	6.39415e-85
cg12899423	11	44328154	ALX4	S_Shore	----	2.0035e-116	----	2.15138e-11		1
cg06180356	3	145879710	PLOD2;PLOD2	S_Shore	----	2.96754e-116	----	8.32223e-05			1
cg14044707	9	132628998	USP20;USP20;USP20	N_Shore	----	7.21391e-116	----	8.69604e-10
cg16609957	5	132161867	SHROOM1;SHROOM1	S_Shore	----	8.32879e-116	++++	1.21161e-21			1
cg01074657	1	78511466	GIPC2	N_Shore	----	1.5969e-115	++++	8.78457e-07			1
cg13411784	9	140473680	WDR85	Island	----	1.6428e-115	++++	1.04011e-20
cg24125828	6	32117049	PRRT1	Island	----	2.03301e-115	++++	3.70533e-234
cg13565129	6	28601419		N_Shore	----	2.69866e-115	++++	0.000396109			1
cg12269535	6	43142014	SRF	Island	++++	6.32857e-115	----	1.00503e-55		1
cg01586208	19	22806647		Island	----	7.27949e-115	++++	1.54017e-12
cg00881300	15	41219486		Island	----	8.78785e-115	----	5.21369e-91
cg18451588	7	29606289	PRR15	Island	++++	9.37808e-115	++++	5.29567e-07		1
cg10579530	2	80550119	CTNNA2;CTNNA2	S_Shore	----	1.47557e-114	++++	9.48301e-08			1
cg12899747	3	25391527			++++	1.56411e-114	----	8.6239e-199
cg07529654	18	3447016	TGIF1;TGIF1	N_Shore	----	1.69199e-114	----	2.19368e-143
cg09018483	6	32191496	NOTCH4		----	1.71494e-114	----	1.00864e-48
cg25877436	13	27998191	GTF3A	N_Shore	----	4.32835e-114	++++	2.24353e-06			1
cg00584549	6	29796439	HLA-G	Island	----	5.34485e-114	++++	5.40715e-12
cg03935116	12	31476565	FAM60A;FAM60A;FLJ13224;FAM60A	N_Shore	++++	6.59089e-114	----	1.43426e-11
cg02624701	19	49937176	SLC17A7	Island	----	7.08275e-114	++++	1.96054e-08			1
cg02419920	4	48486785	SLC10A4	S_Shore	----	8.09925e-114	++++	1.37589e-18
cg10253847	6	28227085	NKAPL	Island	----	1.36408e-113	++++	7.29917e-12
cg10389771	1	156616779	BCAN;BCAN	Island	----	1.79692e-113	++++	8.4993e-45	1
cg05741395	15	42173869	SPTBN5	N_Shore	----	1.81987e-113	----	7.25982e-68
cg03986858	4	41879651		N_Shore	----	2.38387e-113	++++	2.4183e-15
cg26675395	16	31159623	PRSS36	Island	----	2.42978e-113	++++	1.25522e-07			1
cg24070990	1	228634724		S_Shore	----	2.90196e-113	++++	3.37086e-17			1
cg08330404	6	166419593		N_Shelf	----	3.34463e-113	++++	4.87923e-07
cg00565882	2	38300707	CYP1B1	N_Shore	----	4.22997e-113	++++	5.76129e-41
cg02144258	2	220391374	ACCN4;ACCN4	S_Shelf	----	4.52509e-113	----	8.36814e-30
cg17165695	2	39187882	LOC100271715;LOC375196	Island	----	4.68904e-113	++++	2.45306e-37			1
cg16246169	3	181412965	SOX2OT	N_Shore	----	5.14811e-113	++++	2.57996e-07		1	1
cg14235811	9	37903063	MCART1;MCART1;MCART1	N_Shore	++++	5.60718e-113	----	7.3877e-52		1
cg10016608	17	34079665	GAS2L2		----	1.17718e-112	----	0.000166445	1
cg11177833	17	4692377	GLTPD2	Island	----	1.70839e-112	++++	5.61373e-09			1
cg01492523	4	155413789	DCHS2;DCHS2	S_Shore	----	2.20352e-112	++++	4.4759e-06			1
cg08889009	15	59157123		Island	----	3.50858e-112	++++	4.48902e-77			1
cg04625615	15	41788368	ITPKA	Island	----	4.59067e-112	----	0.00873867			1
cg14035521	9	37486469	POLR1E	S_Shore	++++	8.23042e-112	----	8.19107e-67
cg10242160	4	48493350	ZAR1	Island	----	1.12144e-111	++++	1.52476e-242
cg07376381	1	32741518	LCK;LCK	Island	----	2.4724e-111	++++	1.17521e-08
cg15255455	19	4534986	PLIN5	N_Shore	----	2.5511e-111	++++	1.5687e-25
cg03353995	11	62455369	LRRN4CL	Island	----	2.59045e-111	++++	5.99082e-45			1
cg12360753	4	170802626			++++	2.79703e-111	----	7.03684e-06			1
cg27434368	19	19650978	CILP2	Island	----	4.39393e-111	++++	3.31184e-97			1
cg08900404	7	29605808	PRR15	N_Shore	++++	7.41065e-111	++++	1.43852e-16		1
cg20444256	19	45826341	CKM	N_Shore	----	1.3149e-110	----	2.29665e-19
cg04842472	7	39872851		Island	----	1.64936e-110	++++	4.46935e-19
cg04487205	17	36997563	C17orf98	Island	----	2.29533e-110	++++	6.9647e-08			1
cg18272538	1	210425852			----	3.67254e-110	++++	2.10351e-24		1	1
cg08537783	1	10795394	CASZ1;CASZ1		----	4.22997e-110	++++	0.000443655		1	1
cg14171514	11	62308492	AHNAK;AHNAK		----	4.29556e-110	----	3.74795e-33
cg06776173	1	46932780		Island	----	4.4923e-110	----	1.68969e-09			1
cg11853697	20	60510235	CDH4	N_Shore	++++	4.75462e-110	++++	1.12307e-43		1
cg20426959	5	134802501			----	5.11532e-110	++++	1.64772e-07			1
cg17967673	19	38040009		Island	----	8.75506e-110	++++	1.06241e-08			1
cg11807280	2	66654644		S_Shore	++++	1.23948e-109	----	6.13182e-266
cg00760935	4	155411351	DCHS2;DCHS2	Island	----	1.71494e-109	++++	6.84338e-65			1
cg06900164	5	132158840	SHROOM1	Island	----	2.87245e-109	++++	1.2985e-122
cg23918296	14	103397019	AMN	Island	----	2.91508e-109	++++	1.01487e-37
cg23444264	10	72219751		S_Shore	----	3.22003e-109	----	1.4336e-10			1
cg18856731	12	58011764		N_Shore	----	5.63997e-109	++++	1.4054e-16			1
cg19318393	1	223936508	CAPN2;CAPN2	Island	----	5.73834e-109	++++	8.03367e-143
cg17137424	1	231299352	TRIM67	Island	----	7.67298e-109	++++	1.65822e-39			1
cg13183298	1	2376119		S_Shore	++++	8.16483e-109	----	1.26342e-05		1
cg00964751	17	36828900	C17orf96;C17orf96	N_Shore	----	1.03618e-108	----	4.16767e-17		1
cg04149015	16	31159854	PRSS36	Island	----	1.70183e-108	++++	1.1621e-45			1
cg11138095	13	49794053	MLNR	N_Shore	----	1.76413e-108	++++	1.56739e-91			1
cg22167400	17	26633978	FLJ40504	Island	----	1.77069e-108	++++	1.56903e-35		1	1
cg15756114	2	227515220			++++	1.7838e-108	----	4.8366e-11
cg07519873	19	54483188	CACNG8	Island	----	2.56422e-108	++++	3.87584e-30			1
cg14558529	6	27648341		S_Shore	++++	3.37742e-108	++++	3.40693e-05
cg05017199	7	150497065	TMEM176B;TMEM176B;TMEM176A;TMEM176B;TMEM176B;TMEM176B	Island	----	3.73812e-108	++++	1.3513e-16
cg15582789	9	99145525	SLC35D2	Island	----	5.1809e-108	++++	3.59712e-07
cg14614094	9	133567903	EXOSC2	N_Shore	----	6.45973e-108	++++	3.86928e-197			1
cg09972569	2	231712971		Island	----	8.68948e-108	----	3.4594e-07	1
cg05620980	7	562844		Island	----	1.28539e-107	++++	1.53886e-20			1
cg07820064	2	220299584	SPEG	Island	----	1.77069e-107	++++	7.00405e-31	1
cg00303541	3	51741280	GRM2;GRM2	Island	++++	2.48224e-107	++++	1.40343e-119
cg06869158	19	48900058	GRIN2D	N_Shore	----	3.15117e-107	----	6.11543e-15
cg25749306	19	46997775	PNMAL2	Island	----	4.00044e-107	++++	1.13652e-72			1
cg13328496	10	81227764			----	4.09881e-107	----	1.67691e-16
cg13372743	8	52322134	PXDNL	Island	----	4.4923e-107	++++	3.0505e-09			1
cg00524708	16	31159558	PRSS36	N_Shore	----	4.95137e-107	++++	3.6463e-05
cg15310583	11	79147752	ODZ4	N_Shore	----	1.01651e-106	++++	4.65625e-14			1
cg22196260	19	50936172	MYBPC2;MYBPC2	S_Shore	----	1.11488e-106	++++	4.289e-26
cg04051152	12	12418005	LRP6	N_Shore	++++	1.27555e-106	----	4.45623e-77
cg19084479	7	44163941	POLD2;POLD2	S_Shore	----	1.7838e-106	++++	6.20068e-12			1
cg10917602	16	30996630	HSD3B7;HSD3B7;HSD3B7		++++	1.84283e-106	----	3.01345e-147		1
cg06706876	16	57317679	PLLP	N_Shore	----	1.94448e-106	++++	8.38125e-10
cg20374928	20	42087910	SFRS6	S_Shore	----	2.08548e-106	----	2.53307e-05
cg06762457	6	149806635	ZC3H12D		----	3.37742e-106	----	1.43622e-93
cg00476243	7	150023		Island	----	3.8037e-106	++++	0.0080927
cg24683222	4	41880440		Island	----	3.86928e-106	++++	1.00339e-143
cg05867884	5	1246291	SLC6A18	Island	++++	4.52509e-106	++++	3.02591e-08			1
cg10082647	12	107348855	C12orf23	N_Shore	----	5.04974e-106	++++	1.86348e-07			1
cg10612274	11	63827432	MACROD1		----	6.68926e-106	++++	5.18746e-31		1
cg07033202	3	46853631		N_Shore	----	1.05258e-105	++++	2.61603e-14	1		1
cg00750917	8	139507782	FAM135B	N_Shore	----	1.08537e-105	----	4.48246e-36
cg20851828	6	28601440		N_Shore	----	2.23631e-105	++++	8.80425e-10			1
cg23082877	19	49243427	RASIP1	S_Shore	----	2.68554e-105	++++	1.09028e-25
cg05609159	2	210187995			----	3.15773e-105	----	1.89529e-75
cg00917003	7	150716366	ATG9B	Island	----	4.29556e-105	++++	3.90207e-54
cg06824523	1	2411612	PLCH2	S_Shore	++++	5.01695e-105	----	9.77485e-21
cg09183450	11	62308513	AHNAK;AHNAK		----	1.64608e-104	----	2.62881e-52
cg01360605	20	58983676			----	1.82315e-104	----	1.75396e-31
cg08466030	10	60336784	BICC1		++++	2.02973e-104	----	5.97771e-07
cg20941258	3	46618668	LRRC2;TDGF1	Island	----	2.19696e-104	++++	1.95759e-16	1		1
cg23960707	17	56083289	SFRS1;SFRS1	N_Shore	++++	3.60695e-104	----	2.31501e-135		1
cg04555966	7	44185986	GCK;GCK;GCK	Island	----	4.29556e-104	++++	0.000117456			1
cg09523275	6	28227093	NKAPL	Island	----	4.36114e-104	++++	3.2056e-26	1
cg09660145	16	3018104	KREMEN2;KREMEN2;PAQR4	Island	----	5.80392e-104	++++	0.000109848			1
cg13545212	17	6617192	SLC13A5;SLC13A5	Island	----	6.06624e-104	++++	3.93486e-46			1
cg18304448	4	183062004	MGC45800	N_Shore	----	7.9353e-104	++++	4.02995e-29
cg24358846	8	99984680		Island	----	8.45995e-104	++++	3.48891e-27			1
cg17052170	8	144099482	LY6E;LY6E;LOC100133669	Island	----	1.31818e-103	----	4.11521e-14		1
cg15726055	1	2506027			----	1.32474e-103	----	1.82053e-10
cg20892847	12	58011875		N_Shore	----	2.25271e-103	++++	1.53689e-15
cg11166453	1	247681781		Island	----	2.58061e-103	++++	8.04023e-11			1
cg01590439	8	143278608	NCRNA00051		----	3.47579e-103	----	4.32835e-35
cg03217115	2	118942841		N_Shore	----	3.93486e-103	----	9.13543e-08
cg01603290	17	40805956		Island	----	1.02634e-102	++++	1.12209e-08	1		1
cg03534662	3	45636225	LIMD1	S_Shore	++++	1.37064e-102	----	2.4724e-115
cg13380502	1	27718221	GPR3	N_Shore	----	1.42311e-102	----	7.03684e-10
cg18530324	18	46064992	KIAA0427;KIAA0427	N_Shore	----	2.18057e-102	----	1.5864e-09
cg20017761	20	25128807	LOC284798;LOC284798;LOC284798	Island	----	3.08231e-102	++++	7.42049e-16		1	1
cg25584814	19	345306	MIER2	Island	----	3.21019e-102	++++	9.96175e-15			1
cg10056203	10	13571816		S_Shore	----	3.2397e-102	----	0.00170543
cg26069353	14	31343427	COCH;COCH	Island	----	3.93486e-102	++++	6.87945e-40
cg27158481	20	25128681	LOC284798;LOC284798;LOC284798	N_Shore	----	5.37764e-102	++++	0.000683026			1
cg08842287	16	3747018	TRAP1		----	7.64019e-102	----	8.6403e-05
cg17430979	4	6034828	JAKMIP1		----	1.18374e-101	----	4.59067e-125		1
cg07021181	11	122853573	BSX	N_Shore	----	1.65264e-101	++++	2.18188e-06			1
cg07004999	7	155283140		N_Shore	----	3.67254e-101	++++	8.77474e-06		1	1
cg18828861	6	116576566	TSPYL4	S_Shore	++++	4.45951e-101	----	2.6016e-20
cg16374999	12	49688980	PRPH;PRPH	Island	----	8.13204e-101	++++	1.20997e-138
cg23565821	6	33385056	CUTA;CUTA;CUTA;CUTA;CUTA	N_Shore	++++	8.88623e-101	----	2.98492e-27		1
cg09819656	14	34270090	NPAS3;NPAS3;NPAS3;NPAS3	Island	----	1.71822e-100	++++	0.00212155		1
cg00491180	16	2892604	TMPRSS8	Island	++++	2.41666e-100	++++	0.000352498			1
cg17718036	6	27219983	PRSS16	S_Shore	----	4.36114e-100	++++	4.34146e-09
cg25219329	22	42679444		Island	----	4.42672e-100	++++	4.55788e-106
cg10580293	7	29605897	PRR15	Island	++++	6.13182e-100	++++	0.000149721
cg13130398	1	174844397	RABGAP1L;RABGAP1L		++++	9.3125e-100	----	1.09619e-18
cg04582871	11	63827695	MACROD1		----	1.03618e-99	++++	4.29883e-06
cg17584196	11	82445114	FAM181B	S_Shore	----	1.64936e-99	++++	1.74773e-82
cg06215416	1	2383473			++++	1.70183e-99	----	0.00930266
cg13982318	9	72131655	APBA1	Island	----	2.48224e-99	++++	8.64358e-13			1
cg22900415	13	20736075	GJA3	Island	----	2.57405e-99	++++	7.37786e-118
cg24251135	4	144109657	USP38	S_Shelf	++++	3.23314e-99	----	3.18494e-20		1
cg10520226	1	2811554			----	3.57416e-99	----	1.06143e-40
cg15511801	10	88296171		Island	----	3.93486e-99	++++	2.24943e-104
cg17214023	2	10176748			----	4.4923e-99	----	3.15313e-63
cg04120272	17	37123843	FBXO47		----	4.62346e-99	++++	0.00510548			1
cg22993195	3	49756301	AMIGO3;RNF123	Island	----	5.54159e-99	++++	1.07881e-09	1
cg26116950	12	41582017	PDZRN4	N_Shore	----	6.42694e-99	++++	1.1011e-28
cg01512026	1	27718277	GPR3	N_Shore	----	6.45973e-99	----	1.71134e-07			1
cg17515024	1	228644963	HIST3H2BB	N_Shore	++++	1.81987e-98	----	9.77485e-43		1
cg08291506	15	89525620			----	2.18713e-98	----	2.41272e-74				1
cg21692450	1	46940325		Island	----	3.86928e-98	++++	1.82938e-25
cg08709672	1	206224334	AVPR1B;AVPR1B	S_Shore	----	3.96765e-98	----	1.35687e-22		1
cg00862597	14	61750802		S_Shelf	++++	4.55788e-98	----	3.54465e-15		1
cg27558485	3	195943149	OSTalpha		----	4.98416e-98	++++	7.78119e-09			1
cg16686396	1	3282870	PRDM16;PRDM16		----	5.1809e-98	----	2.23631e-130
cg00847453	6	110720501	DDO;DDO	N_Shore	----	5.24648e-98	----	8.296e-21
cg10010533	11	82445170	FAM181B	S_Shore	----	5.5088e-98	++++	3.31184e-90
cg01901101	1	9486939		N_Shore	++++	5.73834e-98	++++	7.41065e-132
cg08164233	13	37394589	RFXAP	S_Shore	++++	6.68926e-98	----	8.97476e-77		1
cg20314918	2	166151447	SCN2A;SCN2A;SCN2A		++++	7.34507e-98	----	1.51033e-34
cg12692314	6	28642279			++++	9.77157e-98	++++	0.000189562
cg22344122	11	66839085	RHOD	Island	----	1.04274e-97	++++	2.26025e-08
cg08832227	12	5020693	KCNA1	Island	----	1.27883e-97	++++	3.88895e-17
cg21009265	11	46410121		N_Shore	----	2.10187e-97	----	5.39732e-24
cg18391323	13	20716432	GJA3	Island	----	2.15106e-97	++++	1.45623e-12
cg06865451	1	39035934			----	3.83649e-97	++++	7.77791e-55			1
cg16829998	19	49944964	SLC17A7	N_Shore	++++	4.55788e-97	++++	2.95836e-06			1
cg05317207	19	58867669	ZNF497	Island	----	4.68904e-97	++++	8.09925e-25			1
cg13951797	16	2204381	TRAF7	N_Shore	++++	5.57439e-97	----	2.96918e-39		1
cg01327602	19	55952038	SHISA7	Island	++++	6.52531e-97	++++	4.46607e-16
cg18505959	6	31670195	BAT5	N_Shore	++++	6.82042e-97	----	6.65647e-143		1
cg03946923	4	109093221	LOC641518;LOC641518	Island	----	7.96809e-97	++++	1.6851e-11			1
cg25839482	15	75931953	IMP3;IMP3	Island	++++	9.24692e-97	----	3.35775e-13		1
cg10504392	12	110044639			----	1.02634e-96	++++	1.29457e-14
cg11619216	17	73642080	LOC100130933;RECQL5		----	1.05258e-96	----	1.40671e-117
cg24872425	3	138725335	PRR23A	Island	----	1.18702e-96	++++	6.61712e-20
cg07522372	18	13390440	C18orf1;C18orf1	S_Shelf	++++	1.20669e-96	----	0.000383321			1
cg08884571	19	45901453	PPP1R13L;PPP1R13L	Island	----	1.21653e-96	++++	2.51962e-30
cg00531453	7	123673926	TMEM229A	S_Shore	----	1.53787e-96	++++	5.51864e-07
cg06318402	1	244894363		Island	----	1.55755e-96	++++	1.97268e-13
cg18055623	19	54485327	CACNG8;MIR935	Island	----	2.20024e-96	++++	1.1575e-43
cg03772909	3	138725311	PRR23A	Island	----	2.64947e-96	++++	1.00568e-30
cg02718966	3	42846970	HIGD1A;HIGD1A;HIGD1A	S_Shore	----	3.24298e-96	++++	3.42989e-08
cg07979747	6	30860136	DDR1;DDR1;DDR1		----	3.70533e-96	++++	3.05509e-23		1
cg18757405	8	49183060			----	3.83649e-96	++++	5.1809e-29
cg08863620	10	88136768		Island	----	8.52553e-96	++++	2.59701e-12
cg18625289	19	1591035	MBD3	N_Shore	++++	1.15095e-95	----	2.77637e-32
cg06844930	4	125633631	ANKRD50;ANKRD50;ANKRD50;ANKRD50	Island	----	1.24932e-95	++++	7.22047e-16			1
cg00346985	1	46940516		S_Shore	----	1.60673e-95	++++	5.80392e-19
cg06376520	12	81110776	MYF5;MYF5	Island	----	1.68215e-95	++++	7.28277e-25
cg15509361	7	19183325		N_Shore	----	1.79692e-95	++++	2.70423e-23
cg15685144	14	103740597		Island	----	2.1281e-95	++++	7.98777e-39			1
cg26340700	1	231663886	TSNAX-DISC1;TSNAX-DISC1;TSNAX-DISC1;TSNAX;TSNAX-DISC1;TSNAX-DISC1;TSNAX-DISC1;TSNAX-DISC1;TSNAX-DISC1	N_Shore	----	2.68882e-95	----	7.41065e-14
cg24328774	6	44537819			----	2.80031e-95	----	2.56979e-08		1
cg00498401	17	74024829	EVPL		----	3.06919e-95	----	3.09182e-37		1
cg20359994	6	27599141		Island	++++	3.17412e-95	++++	4.65625e-225
cg07785717	19	54485321	CACNG8;MIR935	Island	----	3.60696e-95	++++	1.75101e-121
cg22804000	7	24797691	DFNA5;DFNA5;DFNA5	S_Shore	----	7.18112e-95	++++	9.21741e-26		1	1
cg17035539	1	229544326		S_Shore	----	8.68948e-95	++++	1.08438e-08		1	1
cg02806645	3	138725153	PRR23A	Island	----	9.27971e-95	++++	3.96109e-17			1
cg18877667	17	48051089	DLX4;DLX4	S_Shore	----	1.40999e-94	----	6.76796e-22			1
cg04188920	10	3138534	PFKP		----	3.04296e-94	----	1.66543e-24
cg18363035	13	20805385	GJB6;GJB6;GJB6;GJB6	N_Shore	----	3.54137e-94	++++	8.08942e-06		1
cg22509164	1	46766957	LRRC41	N_Shore	++++	3.67254e-94	----	4.17751e-06
cg04358214	16	67143304	C16orf70	Island	----	6.03345e-94	----	2.30812e-06
cg18959207	10	18549686	CACNB2;CACNB2;CACNB2;CACNB2;CACNB2;CACNB2;CACNB2;CACNB2		----	8.03367e-94	++++	0.000609247		1
cg25733708	19	54393220	PRKCG	Island	----	1.06241e-93	++++	2.81113e-41			1
cg17879299	6	30860300	DDR1;DDR1;DDR1		----	1.12799e-93	++++	1.19325e-27		1
cg09857324	16	1545151	TELO2	S_Shore	++++	1.57066e-93	----	2.73604e-73	1
cg16966992	14	31343356	COCH;COCH	Island	----	1.71494e-93	++++	3.98405e-23
cg01385679	20	45033155	ELMO2;ELMO2	N_Shore	----	2.40682e-93	----	3.77419e-05
cg24369989	15	78933807	CHRNB4	Island	----	2.95442e-93	++++	1.70183e-260
cg12883767	12	58013109	SLC26A10	N_Shore	----	3.24298e-93	++++	3.26003e-33
cg09528056	4	2964211	GRK4;GRK4;GRK4;NOP14	N_Shore	++++	3.96765e-93	----	8.67637e-06
cg19185846	2	71123233		N_Shelf	----	7.31228e-93	----	2.92655e-14			1
cg12327405	18	11751343	GNAL;GNAL;GNAL	Island	----	7.86972e-93	++++	1.32211e-05			1
cg24350475	10	30316933	KIAA1462		----	1.34113e-92	----	9.50925e-193
cg01767631	13	20716728	GJA3	Island	----	1.38048e-92	++++	4.59723e-06
cg24576535	3	113417997		S_Shelf	----	1.5969e-92	++++	3.39382e-18			1
cg07047815	11	1909656	LSP1;LSP1;LSP1;LSP1		----	1.82643e-92	----	3.32824e-09
cg09357462	10	112259305	DUSP5	S_Shore	----	2.12155e-92	----	2.29861e-37
cg27365324	15	40727743		N_Shore	----	2.27894e-92	++++	5.15795e-41			1
cg00305229	1	46943714		S_Shelf	----	2.70194e-92	++++	0.000398405			1
cg16216407	4	24797140	SOD3;SOD3	N_Shelf	----	3.34463e-92	----	0.000258488
cg10605137	12	58016356	SLC26A10	S_Shore	----	3.41021e-92	----	4.17751e-22
cg12656312	11	6024266	OR56A4		++++	4.16439e-92	----	2.68784e-06		1
cg01783525	16	33939152		Island	----	4.72183e-92	++++	2.13499e-36
cg08857797	17	40927699	VPS25		++++	4.72183e-92	++++	1.30769e-07
cg07293445	7	128550623	KCP;KCP	Island	----	5.70555e-92	++++	2.73178e-11			1
cg11972332	17	59494129		Island	----	7.80414e-92	++++	5.30878e-06	1
cg16779839	17	79374327	BAHCC1	Island	++++	1.40999e-91	----	2.16286e-05
cg05576328	14	24046085	JPH4;JPH4	Island	----	1.75429e-91	++++	7.82709e-06
cg07624705	19	19626525	NDUFA13;TSSK6	Island	----	1.79692e-91	----	7.09259e-08
cg24167372	5	146888628		N_Shore	++++	1.9248e-91	----	8.36814e-40
cg14991769	7	150497157	TMEM176B;TMEM176B;TMEM176A;TMEM176B;TMEM176B;TMEM176B	Island	----	1.94776e-91	++++	1.01552e-20
cg11980800	1	9748107	PIK3CD	N_Shore	++++	1.94776e-91	----	8.85343e-06
cg07212702	6	157137791	ARID1B;ARID1B;ARID1B		----	2.52159e-91	----	1.40147e-06
cg16562724	16	68270631	ESRP2	Island	----	2.66587e-91	++++	3.53809e-60
cg24642169	1	212731669		Island	----	2.83638e-91	++++	2.60652e-50	1
cg05772532	1	2425011	PLCH2		++++	3.34463e-91	----	4.88251e-71		1
cg23625823	4	183698078	ODZ3		++++	3.96765e-91	----	1.07422e-16		1
cg10640072	8	99985888		Island	----	4.00044e-91	++++	1.09061e-70			1
cg07009504	13	25115530		N_Shore	----	5.01695e-91	++++	2.04416e-19		1
cg17072494	6	149401166			----	9.18134e-91	----	7.12865e-16		1
cg14030904	6	149806732	ZC3H12D		----	1.49197e-90	----	1.02306e-58
cg00073090	19	1265879		Island	----	1.66904e-90	----	9.27971e-24
cg18198730	1	247681584		Island	----	1.75757e-90	++++	1.32244e-06			1
cg25679766	6	28558113		S_Shelf	----	2.06908e-90	++++	1.30244e-18
cg00421221	2	121106091	INHBB	N_Shore	----	2.13794e-90	----	2.0681e-09
cg14592072	7	127774800		N_Shore	----	2.17401e-90	++++	4.7743e-07			1
cg27143204	5	54530375	CCNO	S_Shore	----	2.52487e-90	----	1.09487e-44		1	1
cg14843341	6	42072683	C6orf132	Island	----	3.06591e-90	++++	3.7414e-19	1		1
cg10275315	15	83954246	BNC1	S_Shore	----	3.25938e-90	++++	4.86611e-30		1
cg03427330	13	111465028		Island	----	3.73812e-90	++++	5.31206e-08			1
cg11853788	1	179561347	TDRD5	Island	----	4.00044e-90	++++	8.66325e-34
cg05408649	12	54446019	HOXC4	Island	----	7.41065e-90	++++	1.92841e-12
cg09182138	1	156612436	BCAN;BCAN	Island	----	8.55832e-90	++++	1.07028e-38	1
cg12959079	19	2488464		Island	----	8.55832e-90	++++	9.28299e-12
cg14688272	17	80673958	FN3KRP	N_Shore	----	1.01978e-89	----	5.29567e-06			1
cg14552982	9	133568226	EXOSC2	N_Shore	----	1.5182e-89	++++	3.7873e-16		1	1
cg14671222	7	149411256	KRBA1	Island	----	1.54771e-89	++++	1.16997e-22
cg05806333	16	756033	FBXL16	Island	----	1.60018e-89	++++	0.00016956		1
cg19187682	20	62682021	SOX18	S_Shore	----	1.67887e-89	----	6.58105e-54
cg06697267	20	22565240	FOXA2;FOXA2	Island	----	1.71494e-89	++++	3.83649e-137			1
cg01858866	1	40040016	PABPC4;PABPC4;PABPC4	N_Shore	++++	1.7379e-89	----	3.36103e-43		1
cg11855943	17	47964664		N_Shelf	----	1.74445e-89	----	1.37064e-16
cg19313402	1	220102307	SLC30A10	S_Shore	----	2.2855e-89	++++	3.7873e-06
cg15691862	1	47905438	FOXD2;FOXD2	Island	----	2.28878e-89	++++	5.93508e-95
cg04460816	19	19221572	SLC25A42	Island	----	2.91508e-89	++++	1.17488e-12			1
cg21213853	3	51741473	GRM2;GRM2	S_Shore	++++	5.73834e-89	++++	7.07291e-72		1
cg14469684	9	138997380		S_Shelf	----	5.93508e-89	----	9.28299e-60
cg25840926	2	20647987	RHOB;RHOB	Island	----	6.82042e-89	++++	1.26965e-24
cg25798460	11	5990720	OR56A5		++++	7.14833e-89	----	1.44377e-08		1
cg05998930	7	50849285	GRB10	N_Shore	++++	7.50902e-89	----	6.29578e-12		1
cg09085932	10	121172083	GRK5		----	8.45995e-89	----	2.6357e-38
cg26682407	13	113660246	MCF2L;MCF2L	N_Shelf	++++	1.20341e-88	++++	6.36464e-41
cg19398269	6	28678460			----	1.21325e-88	++++	3.81354e-09			1
cg06060874	1	3269315	PRDM16;PRDM16		----	1.27555e-88	----	1.44278e-61
cg01971160	1	75593804	LHX8	N_Shelf	----	1.36081e-88	++++	7.22047e-41			1
cg15772924	12	54413384	HOXC4;HOXC5;HOXC6	S_Shore	----	1.40671e-88	++++	0.000105487			1
cg00398420	16	56681867			----	1.66248e-88	++++	0.00921741		1	1
cg05063952	17	37380697	STAC2	N_Shore	----	1.68871e-88	++++	5.07597e-08
cg06846259	2	25384654	POMC;POMC	Island	----	1.68871e-88	++++	6.47284e-08			1
cg19169342	5	137827400		Island	----	1.76085e-88	++++	9.42071e-07
cg26099045	2	64291800			----	1.93464e-88	----	1.82414e-18
cg15094236	6	1070389	LOC285768;LOC285768		----	2.11171e-88	----	6.97454e-40
cg04519487	15	52404977	BCL2L10	Island	----	2.65931e-88	++++	8.56816e-05			1
cg15610667	17	7287271	TNK1	Island	----	4.03323e-88	++++	2.05236e-11	1		1
cg20863339	3	71804005	GPR27;EIF4E3;EIF4E3	Island	----	6.68926e-88	++++	4.28244e-21			1
cg14373988	1	2345333	PEX10;PEX10	N_Shore	----	7.86972e-88	----	4.63002e-58
cg18087477	1	115397597	SYCP1;SYCP1	Island	----	1.24932e-87	++++	4.10537e-21			1
cg01905210	3	138154620	ESYT3	Island	----	2.02973e-87	++++	0.000559078			1
cg14472366	13	20875915		Island	----	2.58061e-87	++++	3.50858e-243
cg27018380	14	93389876	CHGA	Island	----	3.70533e-87	++++	1.59362e-107			1
cg27464846	16	88268600		S_Shore	----	4.06602e-87	----	2.1563e-06		1
cg02955804	16	33943412		S_Shore	----	4.09881e-87	++++	2.47765e-10			1
cg24698211	5	170877540	FGF18	N_Shore	----	5.80392e-87	----	2.39076e-09
cg04058752	11	76751369	B3GNT6	Island	----	5.93508e-87	++++	3.14658e-78
cg18232816	12	33591505	SYT10	N_Shore	----	6.65647e-87	++++	3.70861e-05
cg02353258	4	183061850	MGC45800	N_Shore	----	7.41065e-87	++++	1.48836e-55
cg12894984	17	37823631	PNMT	N_Shore	----	8.6239e-87	----	6.6204e-45
cg08149865	8	21914600	EPB49;EPB49;EPB49;EPB49	S_Shore	----	1.1575e-86	----	1.05258e-22		1
cg15442037	11	69286293		Island	----	1.31818e-86	++++	7.59428e-08
cg04485850	20	60372565	CDH4	N_Shore	++++	1.48213e-86	----	2.68653e-21
cg24364827	1	149871658	BOLA1	Island	----	1.81659e-86	++++	8.24353e-10	1		1
cg18212064	8	143255449			++++	1.81659e-86	----	0.00588262		1
cg23065715	2	220299659	SPEG	Island	----	1.94448e-86	++++	2.12515e-34	1
cg10371155	17	37561101	MED1	S_Shelf	++++	2.11171e-86	----	1.34113e-09		1
cg00448707	1	68512928	DIRAS3	Island	----	2.60029e-86	++++	1.86611e-70
cg25103417	3	157812018		N_Shore	----	2.98394e-86	++++	2.35698e-32			1
cg05049335	11	66103889	RIN1;RIN1	S_Shore	----	3.27905e-86	++++	7.90579e-30
cg00823843	1	244094885		Island	----	3.31184e-86	++++	6.94831e-05
cg01111041	6	32121055	PPT2;PRRT1;PPT2	N_Shore	----	3.443e-86	----	9.5322e-50
cg24871743	1	68512650	DIRAS3	Island	----	3.63975e-86	++++	1.49557e-73
cg09810078	6	30860265	DDR1;DDR1;DDR1		----	4.09881e-86	++++	0.000120571		1
cg21511941	15	72489609	GRAMD2	Island	----	4.29556e-86	++++	1.95792e-83
cg14071869	6	41624407		S_Shelf	++++	4.29556e-86	----	4.58083e-11		1
cg07845392	17	79678158	SLC25A10	N_Shore	----	4.45951e-86	++++	4.1939e-33
cg02960125	1	182025752	ZNF648	Island	----	4.45951e-86	++++	0.00328561			1
cg05713794	3	194119861	GP5	S_Shore	++++	5.31206e-86	----	8.4993e-72
cg19515245	2	97151922			----	5.54159e-86	----	0.000250323			1
cg20839206	6	28584121		Island	----	5.73834e-86	++++	2.42387e-49			1
cg13655803	17	48912764	WFIKKN2;WFIKKN2		----	6.09903e-86	----	3.09903e-08
cg11503274	5	149546934	CDX1	Island	----	6.32857e-86	++++	6.98438e-06			1
cg23856413	6	106429659		Island	----	7.37786e-86	++++	2.46585e-93
cg19103219	10	101287059		N_Shore	++++	8.65669e-86	----	1.34572e-29
cg13802736	1	157948536		N_Shore	----	8.91902e-86	----	9.41087e-45
cg13331196	10	88295591		Island	----	1.45262e-85	++++	3.30528e-10
cg12161971	11	77907332	USP35	Island	----	1.5805e-85	++++	4.45951e-92
cg01713950	1	17766995	RCC2	S_Shore	----	1.99038e-85	----	1.41327e-151		1
cg25202302	1	91305655		S_Shelf	----	2.22647e-85	++++	0.000161034			1
cg14382976	7	117067624	ASZ1;ASZ1	Island	----	2.4101e-85	++++	1.17816e-11			1
cg18786782	3	13936527		Island	----	2.67243e-85	++++	1.38573e-15		1	1
cg20295214	1	206226794	AVPR1B	S_Shelf	----	2.6921e-85	----	0.000426604
cg06881093	2	114035983	PAX8;PAX8;PAX8;PAX8;LOC440839;PAX8	Island	----	2.72489e-85	++++	1.18538e-24
cg00073460	6	149806502	ZC3H12D		----	3.0987e-85	----	3.87256e-55
cg03578951	1	44678791	DMAP1;DMAP1;DMAP1	N_Shore	----	3.47579e-85	----	1.9448e-51			1
cg15378486	17	79491582		N_Shelf	----	4.72183e-85	----	2.55733e-31
cg15255946	6	32729563	HLA-DQB2	Island	----	7.90251e-85	++++	1.67756e-10
cg16096531	12	53722216	SP7	S_Shelf	----	1.28867e-84	----	4.29228e-07
cg00962755	1	201439001	PHLDA3	S_Shore	----	1.60673e-84	++++	3.73812e-93
cg20149168	1	68512807	DIRAS3	Island	----	1.9871e-84	++++	5.43339e-81
cg09712464	17	2627328		Island	----	2.04941e-84	++++	5.63341e-54
cg23197460	4	144436129	SMARCA5	S_Shore	++++	2.07564e-84	----	4.21686e-70		1
cg16798348	11	76751596	B3GNT6	Island	----	3.73812e-84	++++	0.00604001
cg05308495	19	54515169	CACNG6;CACNG6;CACNG6	Island	----	4.68904e-84	++++	2.5957e-22			1
cg10599571	21	35445161	MRPS6;SLC5A3	Island	----	6.1974e-84	++++	1.5264e-06	1
cg03294491	18	45458243	SMAD2;SMAD2;SMAD2	S_Shore	----	8.82064e-84	++++	2.47732e-29
cg06374325	4	85414486	NKX6-1	Island	----	9.21413e-84	++++	9.14855e-123			1
cg25923214	17	74864205	MGAT5B	Island	----	1.81397e-83	++++	1.19357e-12
cg04897644	1	155264372	PKLR;PKLR	Island	----	1.92874e-83	++++	0.00110799			1
cg20318166	15	85360664	ALPK3	S_Shore	----	2.07138e-83	++++	3.93486e-157
cg27138204	12	54446100	HOXC4	Island	----	2.10876e-83	++++	1.57066e-11
cg10930901	5	146885434		N_Shelf	++++	2.25599e-83	----	5.01367e-52
cg03460682	2	219646316	CYP27A1	N_Shore	----	2.49601e-83	++++	2.07138e-18
cg16960758	2	169658992	NOSTRIN;NOSTRIN;NOSTRIN;NOSTRIN		++++	2.89638e-83	----	1.23948e-208
cg14094447	9	74383399	TMEM2;TMEM2;TMEM2;TMEM2	Island	----	3.00984e-83	++++	2.36583e-06
cg17736526	7	1329387		Island	----	3.30528e-83	----	3.22462e-06
cg11367973	12	51633848	DAZAP2;DAZAP2;DAZAP2;DAZAP2;DAZAP2;DAZAP2	S_Shore	++++	5.7449e-83	----	5.66948e-41
cg00700412	12	58011837		N_Shore	----	6.12527e-83	++++	1.81036e-16
cg06355129	1	156646293	NES	Island	----	7.33523e-83	++++	3.10198e-11
cg06264984	2	38300885	CYP1B1	N_Shore	----	7.67298e-83	++++	5.59734e-61
cg06631310	12	58013324	SLC26A10	Island	----	1.06044e-82	++++	0.00026357
cg06301726	16	86589283	MTHFSD;MTHFSD;MTHFSD;MTHFSD;MTHFSD;MTHFSD;MTHFSD;FLJ30679	Island	----	1.14275e-82	++++	0.0017556			1
cg21848981	4	190597409			++++	1.16505e-82	++++	0.00107618
cg27565555	20	55839663	BMP7	Island	----	1.23423e-82	++++	4.74151e-13
cg24856658	5	78533917	JMY	S_Shore	++++	1.56476e-82	----	4.22997e-53		1
cg06913600	2	43020682	HAAO	S_Shore	++++	1.6592e-82	----	2.4442e-13
cg14708218	10	124638991	LOC399815;FAM24B	Island	----	1.69822e-82	++++	6.85321e-07			1
cg07218081	3	45066714	CLEC3B		----	2.34944e-82	----	3.79058e-72		1
cg13375538	19	12911875	PRDX2;PRDX2	N_Shore	++++	2.37895e-82	----	2.81605e-30
cg19634157	10	124639157	LOC399815;FAM24B	Island	----	2.70325e-82	++++	9.47318e-16			1
cg26470479	17	40805923		Island	----	2.74063e-82	++++	6.86961e-54
cg05938607	10	60274200	BICC1	S_Shore	++++	3.42333e-82	----	8.30583e-12
cg00664406	3	51740875	GRM2;GRM2	Island	++++	4.48902e-82	++++	2.98066e-257
cg27152890	19	45900241	PPP1R13L;PPP1R13L	Island	----	4.83004e-82	++++	1.46574e-89
cg16704920	1	2169407	SKI		----	4.84316e-82	----	1.0247e-12		1
cg12934382	3	51741135	GRM2;GRM2;GRM2;GRM2	Island	++++	5.20713e-82	++++	1.19357e-268		1
cg04626491	6	28584053		Island	----	6.2761e-82	++++	1.19456e-30			1
cg18414021	14	100069535	CCDC85C	Island	----	6.41382e-82	++++	4.03323e-137
cg26838023	20	30072314	NCRNA00028;REM1	Island	----	6.50236e-82	++++	5.09564e-07			1
cg09037777	1	155265378	PKLR;PKLR	Island	----	7.30244e-82	++++	8.60095e-08			1
cg25526039	6	107813291	SOBP	S_Shore	----	9.45678e-82	++++	1.83299e-12		1	1
cg02913194	6	143928514	PHACTR2;PHACTR2		++++	1.31687e-81	++++	3.07772e-06
cg25925023	2	220299484	SPEG	Island	----	1.47262e-81	++++	8.59111e-18
cg19656950	13	100607772		N_Shore	----	1.90972e-81	++++	4.68248e-15
cg13382100	12	132414849	PUS1;PUS1;PUS1	S_Shore	++++	2.16909e-81	----	3.9906e-16
cg04492927	5	180480817	BTNL9	Island	++++	2.27074e-81	++++	2.8331e-14
cg03661409	2	191812319	GLS		----	2.66193e-81	----	2.89015e-65
cg06239726	7	50517434	FIGNL1;FIGNL1	N_Shore	++++	2.67407e-81	----	1.11488e-130		1
cg00488692	2	174877566		Island	----	3.24757e-81	++++	6.82698e-53		1	1
cg05068202	11	2293074	ASCL2	S_Shore	----	3.69549e-81	++++	0.000823697
cg15242570	9	90341048	CTSL1;CTSL1;CTSL1;CTSL1	Island	----	4.3349e-81	++++	6.03345e-93			1
cg08222399	5	16936466	MYO10	N_Shore	----	5.33174e-81	++++	3.39054e-07
cg02964065	6	32729545	HLA-DQB2	Island	----	6.20724e-81	++++	0.00291344
cg02045971	3	138739874	PRR23B	Island	----	7.36147e-81	++++	3.72172e-09			1
cg03621001	19	16221719	RAB8A	N_Shore	----	9.72238e-81	++++	0.00193267
cg23533513	11	76849324	MYO7A;MYO7A;MYO7A	Island	----	9.94536e-81	++++	2.03465e-24
cg21885995	17	74069256	SRP68	N_Shore	----	1.12537e-80	----	1.88513e-06			1
cg20212624	17	40123227	CNP	S_Shelf	----	1.12734e-80	----	4.45623e-16
cg24114014	6	28584167		Island	----	1.17357e-80	++++	9.78141e-65			1
cg18397357	17	28565258		S_Shelf	----	1.19685e-80	++++	3.81354e-08
cg00523604	6	32223341			----	1.41524e-80	----	1.00011e-53
cg19918208	6	28828364		N_Shelf	++++	1.54279e-80	----	2.66193e-55		1
cg18050844	17	44909987			----	1.5441e-80	----	6.59089e-24
cg22820188	1	156086004	LMNA;LMNA;LMNA	S_Shore	----	1.80118e-80	----	6.72205e-112
cg22222281	12	6308758	CD9	N_Shore	----	2.36813e-80	----	4.48246e-37
cg25317746	6	32192024	NOTCH4		----	2.45863e-80	----	7.309e-06
cg18071162	5	25909453		Island	++++	3.09837e-80	++++	0.000361351
cg01595951	5	54834655		S_Shelf	++++	3.97421e-80	----	9.75517e-10		1
cg11985480	2	74729100	LOC151534;LBX2	N_Shore	----	5.75473e-80	----	2.678e-06			1
cg12103742	11	64739852		S_Shore	----	5.8531e-80	++++	3.54465e-10			1
cg19516105	1	26551710		Island	----	6.72533e-80	++++	8.83048e-43			1
cg17207000	17	72321767	KIF19	N_Shore	----	8.20746e-80	----	1.41327e-05			1
cg05097643	16	3018470	PAQR4	Island	----	8.4206e-80	++++	4.6333e-13			1
cg25707805	1	113285387		N_Shore	----	8.98788e-80	++++	6.87617e-15			1
cg12552293	17	36997731	C17orf98	S_Shore	----	9.92241e-80	++++	4.36769e-12
cg00815325	19	5691899	LONP1	Island	++++	1.17652e-79	----	1.66805e-30		1
cg18026225	17	43198423	PLCD3	Island	----	1.49295e-79	++++	5.12188e-21			1
cg19566586	5	180622643	TRIM7;TRIM7;TRIM7;TRIM7;TRIM7	Island	----	1.55296e-79	++++	1.45721e-23			1
cg04453050	3	51740896	GRM2;GRM2	Island	++++	1.72445e-79	++++	2.70194e-205
cg00045114	1	172674159			++++	1.94382e-79	++++	2.41699e-08
cg16681268	7	117067616	ASZ1;ASZ1	Island	----	2.35829e-79	++++	2.27468e-08			1
cg18370682	5	158239759	EBF1		++++	2.96984e-79	++++	5.88589e-62
cg00242358	3	47619041	CSPG5	N_Shore	----	2.99181e-79	++++	4.45623e-43			1
cg10521153	1	91307077			----	3.26888e-79	++++	1.01978e-91
cg17392573	6	27259010		Island	----	3.36103e-79	++++	1.01323e-83
cg16698038	5	5495215		Island	----	3.68893e-79	++++	8.08942e-33
cg13259925	4	155665832	LRAT	Island	----	3.75123e-79	++++	0.000106143
cg19443920	17	40075879	ACLY;ACLY	S_Shore	----	3.82665e-79	----	5.68915e-11		1	1
cg01077178	10	22608674	COMMD3;BMI1	S_Shelf	++++	3.87256e-79	----	4.98416e-149
cg01120874	9	133811816	FIBCD1;FIBCD1	N_Shore	----	3.90863e-79	----	5.91541e-20
cg22130262	8	57026502	MOS	Island	----	3.98077e-79	++++	7.45656e-25
cg07478918	11	31817824	PAX6;PAX6;PAX6	N_Shelf	----	5.43666e-79	++++	9.08625e-29
cg26600753	5	180622446	TRIM7;TRIM7;TRIM7;TRIM7;TRIM7	Island	----	5.71538e-79	++++	7.21391e-11			1
cg02879453	16	50321818	ADCY7		----	6.26299e-79	++++	8.83376e-30
cg00827893	13	33162946	PDS5B	S_Shore	++++	7.79102e-79	----	0.00869932
cg02783889	11	9113370	SCUBE2;SCUBE2	Island	----	1.1903e-78	++++	8.94197e-24
cg24019851	3	50314291	SEMA3B;SEMA3B	Island	----	1.46147e-78	++++	5.7449e-09		1	1
cg17300723	11	62647277	SLC3A2;SLC3A2;SLC3A2;SLC3A2;SLC3A2;SLC3A2	N_Shore	----	1.53e-78	----	0.00277178
cg04464446	11	68452845	GAL	Island	----	2.15958e-78	++++	1.25883e-11			1
cg26998717	12	81110893	MYF5	Island	----	2.25435e-78	++++	1.9248e-16			1
cg09808235	1	2542588	MMEL1		++++	3.03247e-78	++++	4.99727e-23
cg05639522	1	247681581		Island	----	3.10001e-78	++++	1.60149e-05			1
cg17158913	1	10764886	CASZ1;CASZ1	Island	----	3.18691e-78	++++	0.00979452		1
cg05184311	1	201253537	PKP1;PKP1	Island	----	3.5217e-78	++++	2.23598e-11
cg00080125	17	59490613	C17orf82;C17orf82	S_Shore	----	3.6004e-78	++++	0.000156837			1
cg19159759	13	20989818	CRYL1	Island	----	3.60368e-78	++++	3.54793e-06
cg02247068	15	41793472	ITPKA	N_Shore	----	4.38409e-78	++++	5.15139e-51	1		1
cg16842214	3	42727160	KBTBD5	Island	----	4.58083e-78	++++	0.00118538			1
cg22160121	3	138153168	ESYT3	N_Shore	----	4.58411e-78	++++	3.3807e-08			1
cg19501941	11	93582999	C11orf90	N_Shore	----	7.1844e-78	++++	7.43361e-25
cg10282491	16	3062368	CLDN9	N_Shore	----	7.39754e-78	----	8.15172e-06
cg08071609	6	117086040	FAM162B	Island	----	7.46968e-78	++++	1.36113e-55
cg14004921	9	140023416		N_Shore	++++	8.21074e-78	++++	4.78741e-05		1
cg03199745	12	54454445	FLJ12825	Island	----	8.83048e-78	++++	2.86917e-57
cg06910925	18	30051535	FAM59A	S_Shore	----	1.42508e-77	++++	1.00929e-36
cg05034603	1	43396871	SLC2A1		----	1.48213e-77	----	9.19446e-37	1
cg11376341	10	21796152		N_Shore	++++	1.92382e-77	++++	7.15161e-09
cg08888354	19	37958707	ZNF570;ZNF569	N_Shore	----	1.96645e-77	++++	1.01683e-13			1
cg19725903	12	14721020	PLBD1	Island	----	1.973e-77	++++	2.54421e-38
cg26687579	1	2243111		N_Shelf	----	1.99629e-77	----	1.74413e-38
cg17816357	7	124430776			++++	2.18483e-77	----	1.13783e-46
cg11178337	17	43065745			----	2.54946e-77	++++	1.33359e-06		1
cg15970666	2	162095662		Island	----	2.58684e-77	++++	3.54137e-119
cg15908709	17	46676215	LOC404266;LOC404266;LOC404266;LOC404266;HOXB6;LOC404266	S_Shore	++++	2.63373e-77	----	5.21041e-35
cg10714061	6	33714631	IP6K3;IP6K3;IP6K3;IP6K3		----	3.21904e-77	----	1.812e-15
cg12615761	18	8608907	RAB12	Island	----	3.29217e-77	++++	2.38059e-36
cg12449528	2	24233341	MFSD2B	S_Shore	----	4.21358e-77	++++	0.000147688
cg12621203	1	23750509	TCEA3	Island	----	4.25621e-77	++++	9.77157e-09
cg15903032	10	101297605		Island	++++	4.37097e-77	----	1.10504e-112
cg04662594	8	21917015	EPB49;EPB49;EPB49;EPB49;EPB49;EPB49	S_Shelf	----	5.24976e-77	----	1.15423e-90
cg22622440	17	18088359	ALKBH5	Island	++++	5.3842e-77	----	2.58192e-46
cg07313626	1	247681931		Island	----	5.43011e-77	++++	8.30255e-15
cg08482837	2	86038423		Island	----	5.60062e-77	----	2.79572e-12
cg03499943	10	126211704	LHPP;LHPP		----	6.40398e-77	----	9.73878e-06		1
cg12706938	19	1566839	MEX3D	Island	----	6.93191e-77	++++	1.81659e-123
cg09931783	12	123469669	PITPNM2	N_Shore	----	8.44355e-77	----	1.79397e-08
cg25865120	15	48625058	DUT;DUT;DUT	S_Shore	++++	8.93541e-77	----	3.63975e-96
cg20313969	2	112939562	FBLN7;FBLN7	Island	----	1.24637e-76	++++	3.61351e-16
cg01681525	17	79374741	BAHCC1	Island	++++	1.44836e-76	----	4.56772e-30
cg08446111	16	48279428	LONP2	S_Shore	++++	1.48508e-76	----	3.82009e-16
cg13088556	6	117583893		N_Shore	----	1.60542e-76	++++	1.4677e-47			1
cg11589800	10	130832268			++++	1.64871e-76	++++	2.05596e-71
cg18984724	2	220299604	SPEG	Island	----	1.81397e-76	++++	4.61034e-39
cg05473871	19	1513513	ADAMTSL5	Island	++++	1.81594e-76	----	0.000385944
cg07724623	1	115397409	SYCP1	N_Shore	----	2.77703e-76	++++	1.12832e-06			1
cg07969646	1	181057452	IER5	N_Shore	----	3.21773e-76	----	2.72292e-24
cg00220225	3	50194470	SEMA3F	S_Shore	----	3.38726e-76	----	8.80425e-25
cg11964308	12	54535018			----	4.40704e-76	++++	4.65953e-18		1
cg05570258	7	105662884	FLJ23834		++++	4.80053e-76	++++	9.68631e-10
cg04645150	6	28584172		Island	----	4.95464e-76	++++	5.96131e-37			1
cg18026055	6	32729596	HLA-DQB2	Island	----	7.13849e-76	++++	5.3219e-10
cg23921459	1	207224567	YOD1	N_Shore	++++	7.83365e-76	++++	8.18779e-08		1	1
cg20450471	6	28584061		Island	----	9.12232e-76	++++	7.74512e-42			1
cg02049629	6	28662065			----	1.01782e-75	++++	1.02274e-45
cg21721340	20	62682309	SOX18	S_Shore	----	1.09553e-75	----	1.84053e-56
cg08097614	19	46388787	IRF2BP1	Island	++++	1.12307e-75	----	0.000741065
cg24601559	2	43328536		S_Shore	----	1.40212e-75	----	1.24309e-15			1
cg18124782	7	64345550		N_Shelf	----	1.58345e-75	----	1.88611e-24
cg21890667	22	30476089	HORMAD2	Island	----	1.62543e-75	++++	8.87967e-42
cg09477019	16	56681945			----	1.70019e-75	++++	1.01093e-61		1	1
cg10003961	6	168293749	MLLT4;MLLT4;MLLT4		++++	1.89562e-75	----	2.6416e-18		1
cg17720286	19	1513941	ADAMTSL5	Island	++++	2.27992e-75	----	3.72828e-28			1
cg27554551	16	4421486	VASN;CORO7	N_Shore	++++	2.29927e-75	----	0.000205564
cg03270710	2	74729592	LBX2;LOC151534	Island	----	2.51438e-75	++++	3.40037e-47
cg00154846	1	2130580	C1orf86	S_Shelf	----	2.96623e-75	----	8.86983e-75
cg14213394	8	38508585		Island	----	3.27905e-75	++++	7.8107e-28
cg09469667	3	9904687		Island	----	3.3971e-75	----	5.77441e-09
cg23727072	15	75019087	CYP1A1	Island	----	3.73484e-75	++++	3.41677e-23			1
cg00931843	6	155442993	TIAM2		++++	4.59723e-75	++++	3.97421e-19
cg08530838	5	114193858			++++	5.00055e-75	++++	0.000916822			1
cg04793813	16	56659964	MT1E	S_Shore	----	5.11204e-75	++++	0.000101355
cg04053045	2	96810531	DUSP2	Island	++++	5.13499e-75	++++	5.82359e-10
cg13481974	15	42174516	SPTBN5	Island	----	5.37764e-75	++++	8.07302e-33
cg13668490	17	42463640	ITGA2B	S_Shore	----	5.53504e-75	----	6.56138e-14			1
cg21649604	22	39714288	RPL3;RPL3;RNU86	N_Shore	++++	6.24987e-75	----	1.36245e-38		1
cg08886711	12	48399180	COL2A1;COL2A1	Island	----	8.04679e-75	++++	2.36321e-14
cg23570694	10	50976348		Island	----	8.36158e-75	++++	1.75724e-16			1
cg17384889	6	28227068	NKAPL	Island	----	9.38136e-75	++++	1.17029e-07
cg11226183	1	93251218	EVI5	S_Shore	----	1.08373e-74	++++	2.63504e-05		1
cg05673214	16	743476	FBXL16	Island	----	1.21915e-74	++++	1.27752e-17			1
cg25413977	2	66651619		N_Shore	++++	1.46803e-74	----	6.9188e-188
cg13001878	13	113777032	F10		----	1.57198e-74	----	1.58936e-27
cg08355260	2	74729429	LOC151534;LBX2	Island	----	1.62116e-74	++++	3.97093e-29			1
cg14194263	9	136075669		Island	++++	1.63002e-74	++++	2.04252e-22
cg22273555	6	33130034		S_Shore	----	2.11433e-74	----	3.31184e-145
cg00623200	15	65715801	IGDCC4	S_Shore	----	2.30124e-74	++++	3.36103e-09
cg14036143	1	145415441	HFE2;HFE2;HFE2;HFE2	Island	----	2.48322e-74	++++	5.61045e-63
cg22706883	15	67814880	C15orf61	S_Shore	++++	2.73243e-74	----	2.38026e-43
cg13714749	22	40391489	FAM83F	Island	----	2.96229e-74	++++	1.88545e-12		1
cg18119735	1	236850308	ACTN2	Island	----	2.96852e-74	++++	8.69932e-33
cg21726844	13	49794079	MLNR	N_Shore	----	3.18265e-74	++++	4.85299e-84
cg12406703	10	112258680	DUSP5	Island	----	3.44956e-74	----	7.94514e-06
cg19612068	6	33130024		S_Shore	----	3.46268e-74	----	1.10832e-125
cg09863247	20	44539966	PLTP;PLTP	Island	----	3.5053e-74	++++	6.65647e-46			1
cg11245681	5	176166754		N_Shelf	----	3.99716e-74	++++	3.94798e-21		1
cg20469744	13	43949447	ENOX1;ENOX1		++++	4.33163e-74	----	3.25019e-77
cg08886823	16	68270882	ESRP2	Island	----	4.38409e-74	++++	2.27894e-190
cg21183461	15	45427297	DUOX1;DUOX1	Island	----	4.39065e-74	++++	1.04503e-32			1
cg26004771	1	178456093		Island	----	4.4136e-74	++++	2.91835e-17
cg15656686	6	30854551	DDR1;DDR1	S_Shore	----	4.6333e-74	----	2.42191e-06
cg05092353	13	113777013	F10		----	4.91858e-74	----	1.57821e-24
cg21461564	8	63999030	TTPA	S_Shore	----	5.17434e-74	++++	0.000405291
cg01309870	6	28584035		Island	----	7.22375e-74	++++	3.302e-11			1
cg16370398	12	54448913	HOXC4;HOXC4	S_Shore	----	7.52214e-74	++++	0.000232157			1
cg24013620	8	144798688	MAPK15	Island	----	9.86338e-74	++++	3.22527e-60			1
cg09978996	10	70321668	TET1	S_Shore	----	9.8765e-74	++++	6.60401e-07
cg02049180	1	156828202	NTRK1;INSRR	N_Shore	----	1.34703e-73	----	0.000510548			1
cg04636402	5	139284774	NRG2;NRG2;NRG2;NRG2	S_Shore	----	1.35687e-73	++++	1.74216e-13
cg22255095	20	60472331	CDH4	S_Shore	++++	1.43918e-73	----	5.91869e-22
cg16616467	16	89642914	CPNE7;CPNE7	Island	----	1.44442e-73	++++	8.11893e-57
cg09263059	17	43065876			----	1.45491e-73	++++	3.42005e-06		1
cg09656934	1	179561500	TDRD5	Island	----	1.54214e-73	++++	8.42388e-28
cg12582330	1	2473224		S_Shore	----	2.1786e-73	----	3.67254e-106
cg06367459	19	55898325	RPL28;RPL28;RPL28;RPL28;RPL28	S_Shore	++++	2.22844e-73	----	1.23391e-69
cg18588266	14	56229661		N_Shelf	++++	2.37403e-73	----	0.000506285		1
cg06816668	3	74664210		S_Shore	----	2.68357e-73	++++	4.65953e-09		1	1
cg26717009	13	20735967	GJA3	Island	----	2.74358e-73	++++	5.54815e-14
cg20600845	10	64578939	EGR2	S_Shore	----	3.79058e-73	++++	6.84666e-17
cg09234616	11	32452592	WT1;WT1;WT1;WT1	Island	----	3.85288e-73	++++	9.72238e-22
cg07472704	13	113763758	F7;F7	Island	----	3.866e-73	++++	4.28572e-23			1
cg04874795	16	86477638			++++	4.03323e-73	++++	5.80392e-10
cg00603340	5	180622072	TRIM7;TRIM7;TRIM7;TRIM7;TRIM7	N_Shore	----	4.17423e-73	++++	1.21358e-12			1
cg16429505	7	100488398	UFSP1;ACHE;ACHE	N_Shore	----	4.39065e-73	++++	0.00285113
cg06595162	21	40141040	NCRNA00114;NCRNA00114		----	5.31862e-73	----	3.49875e-57		1
cg07588439	2	198571554	MARS2	S_Shore	++++	5.54487e-73	----	3.20855e-22
cg12078155	6	27259121		Island	----	5.65964e-73	++++	2.93934e-31
cg19629631	7	2060116	MAD1L1;MAD1L1;MAD1L1	Island	----	6.10887e-73	----	4.31851e-53
cg18162670	14	103686567		Island	----	6.11215e-73	++++	4.62018e-10			1
cg17889586	19	50794207	MYH14;MYH14;MYH14		----	6.44661e-73	++++	7.75823e-34
cg15931839	6	111880530	TRAF3IP2;TRAF3IP2;TRAF3IP2;TRAF3IP2;TRAF3IP2		++++	6.65647e-73	++++	1.96481e-68		1
cg06480265	6	24722060		S_Shore	----	7.57461e-73	++++	2.92786e-30			1
cg17353412	7	27141774	HOXA2	N_Shore	++++	9.30922e-73	++++	2.57504e-24		1
cg23950724	12	33593177	SYT10	S_Shore	----	9.8765e-73	++++	3.09083e-20
cg01189038	3	183994516	ECE2;ECE2;ECE2;ECE2	S_Shore	----	1.14767e-72	++++	0.000786644
cg05987823	12	54428592	HOXC4;HOXC5;HOXC5	Island	----	1.30178e-72	++++	6.27938e-64
cg11405200	6	14212128		S_Shore	----	1.54148e-72	----	2.5934e-20
cg20722590	16	58061473	MMP15	Island	----	1.66313e-72	----	2.0576e-23
cg07223180	13	20989142	CRYL1	Island	----	1.6651e-72	++++	1.8884e-10		1
cg10584024	1	84234998			++++	1.92087e-72	----	1.67264e-43
cg23316648	4	17096664			++++	1.97136e-72	----	7.99432e-33
cg23390118	12	2339513	CACNA1C;CACNA1C;CACNA1C;CACNA1C;CACNA1C;CACNA1C;CACNA1C;CACNA1C;CACNA1C;CACNA1C;CACNA1C;CACNA1C;CACNA1C;CACNA1C;CACNA1C;CACNA1C;CACNA1C;CACNA1C;CACNA1C;CACNA1C;CACNA1C;CACNA1C;CACNA1C	Island	----	2.16483e-72	++++	1.44868e-44
cg22866121	2	237394573	IQCA1		++++	2.17401e-72	----	1.35917e-46
cg13808012	1	244094935		Island	----	2.24287e-72	++++	0.00119292			1
cg00963378	13	20716638	GJA3	Island	----	2.57471e-72	++++	3.302e-11
cg24063856	17	43863303	CRHR1;CRHR1;CRHR1;CRHR1	S_Shore	----	2.61439e-72	++++	0.00317248			1
cg07803236	5	92956884	FAM172A;FAM172A;FAM172A;FAM172A;MIR2277	Island	++++	2.71505e-72	++++	2.2609e-39
cg19340941	4	155702931	RBM46	Island	----	3.35447e-72	++++	0.003302
cg03509094	19	7928546	EVI5L;EVI5L	Island	----	3.38726e-72	++++	1.50738e-39
cg17463277	3	179791243			++++	4.24309e-72	----	0.00402012
cg01926813	3	138725204	PRR23A	Island	----	4.5546e-72	++++	1.94612e-14			1
cg17921412	5	5495287		Island	----	4.96776e-72	++++	5.96131e-76
cg10350492	5	33937673	RXFP3	Island	----	5.00711e-72	++++	1.31523e-08
cg08513253	6	107955362	SOBP	Island	----	6.0892e-72	++++	6.67942e-70			1
cg08424749	6	32117292	PRRT1	N_Shore	----	6.25971e-72	++++	2.08712e-65
cg04503319	16	89368367	ANKRD11	N_Shelf	----	7.94186e-72	----	1.30834e-151
cg17166338	5	1295969	TERT;TERT	Island	----	7.99432e-72	++++	0.000987322
cg27322846	2	162284638		Island	----	9.63713e-72	++++	1.15816e-53			1
cg10148764	2	101618394	RPL31;RPL31;RPL31	Island	----	9.89945e-72	++++	3.02001e-137
cg14071650	9	129379319	LMX1B	S_Shore	----	1.36277e-71	----	8.20418e-05		1
cg06864083	17	40832319	CCR10	Island	----	1.40212e-71	++++	0.000266521
cg21772773	1	6880294	CAMTA1		----	1.49394e-71	----	9.72566e-17		1
cg03314840	1	155264662	PKLR;PKLR	Island	----	1.52968e-71	++++	1.55722e-10			1
cg26984928	2	26726190	OTOF	Island	----	1.57853e-71	++++	0.0018261
cg09118625	1	68512971	DIRAS3	Island	----	1.69822e-71	++++	1.75232e-61
cg13896204	6	32729442	HLA-DQB2	Island	----	1.72511e-71	++++	5.84983e-07
cg06672737	4	778827	CPLX1	Island	----	1.83528e-71	++++	2.5593e-19			1
cg07797660	1	3239139	PRDM16;PRDM16	N_Shore	----	1.88152e-71	----	7.31228e-41
cg01101873	1	3269478	PRDM16;PRDM16		----	2.06547e-71	----	7.42705e-81
cg01713272	18	12911711		Island	----	2.72751e-71	++++	1.4559e-111
cg20608895	13	109896380			----	3.07444e-71	----	1.72445e-28
cg00292001	3	46853850		Island	----	3.36103e-71	++++	3.27905e-88			1
cg25334934	2	121269348			----	3.47907e-71	++++	4.81365e-07
cg19284039	11	2292895	ASCL2	Island	----	3.97093e-71	++++	2.39731e-20
cg22753548	19	55668066	TNNI3	Island	++++	4.8366e-71	++++	6.09247e-12
cg25311470	7	107950866	NRCAM;NRCAM		++++	4.88251e-71	----	1.34113e-99
cg22243000	17	37813369	STARD3;STARD3;STARD3		----	5.84327e-71	----	5.8695e-113
cg00076325	2	172974630		S_Shore	----	6.51875e-71	++++	4.57755e-22	1
cg26697583	15	89992598			++++	6.65647e-71	++++	0.000555799			1
cg07091481	10	82169149	C10orf58	S_Shore	++++	7.13521e-71	----	5.11532e-106
cg22958090	12	52627438	KRT7	Island	----	8.23369e-71	++++	1.67789e-67
cg06729532	19	14376770		Island	----	8.296e-71	----	2.89212e-15
cg05594525	8	53476865	FAM150A	N_Shore	----	8.95181e-71	++++	5.22025e-09		1
cg20660989	6	35150136		Island	----	9.30594e-71	++++	7.12538e-49
cg19100996	12	133138586	FBRSL1	N_Shore	++++	9.66664e-71	----	1.90906e-67
cg15244786	12	54446279	HOXC4;HOXC4	N_Shore	----	9.92241e-71	++++	0.000312264			1
cg03991721	3	75704951		Island	----	1.16931e-70	++++	3.56105e-16
cg02595575	19	19221316	SLC25A42	Island	----	1.46311e-70	++++	6.69254e-58
cg00054210	8	65711644	CYP7B1	Island	----	1.96251e-70	++++	0.000423981
cg27292818	19	56151972	ZNF580;ZNF580;ZNF580	Island	++++	1.9694e-70	++++	2.59242e-09
cg19691659	11	64482332	NRXN2;NRXN2	S_Shore	----	2.08252e-70	----	5.21369e-41
cg14519664	9	20356459	MLLT3		++++	2.17303e-70	----	5.76129e-23
cg19664013	6	28757366		S_Shelf	++++	2.49109e-70	++++	3.59384e-08
cg08876130	12	49937852	KCNH3		----	2.5593e-70	++++	1.64805e-09
cg22903908	10	64578919	EGR2;EGR2	S_Shore	----	2.88622e-70	++++	4.11193e-11			1
cg27079726	22	46659317	PKDREJ	Island	----	3.39054e-70	++++	0.000116505
cg20141652	19	19221574	SLC25A42	Island	----	4.54148e-70	++++	1.32441e-43			1
cg11644479	11	2292914	ASCL2	Island	----	4.80709e-70	++++	4.34802e-17			1
cg12358432	6	29796593	HLA-G	Island	----	4.85955e-70	++++	1.63395e-09
cg08545129	7	117854304		Island	----	5.3055e-70	++++	0.00644333
cg19364777	19	40722503	TTC9B	N_Shore	++++	5.95475e-70	++++	0.0018543			1
cg16677448	19	36004699	DMKN;DMKN;DMKN;DMKN		----	6.10559e-70	----	2.75112e-05		1	1
cg21408915	11	69286231		Island	----	1.01651e-69	++++	8.98788e-10
cg08307469	5	37835889	GDNF;GDNF;GDNF	N_Shore	----	1.03257e-69	++++	1.40507e-12
cg26523565	5	179779237	GFPT2	Island	----	1.09619e-69	++++	4.32507e-28			1
cg23983173	15	42564634	TMEM87A;TMEM87A	N_Shore	++++	1.12701e-69	----	5.80392e-56
cg22151644	12	54444047	HOXC4	N_Shore	----	1.23128e-69	++++	4.77758e-09			1
cg14590011	6	34113887		Island	----	1.47754e-69	++++	2.0658e-26
cg23115387	1	47882936	FOXE3	Island	----	1.52509e-69	++++	6.9188e-125
cg13500819	5	138725400	MGC29506	N_Shelf	++++	1.9894e-69	++++	7.36803e-25
cg10695105	12	49943166	KCNH3	Island	----	2.51077e-69	++++	8.37469e-74
cg09586459	15	52404463	BCL2L10	Island	----	2.89934e-69	++++	1.08143e-14
cg25361106	2	74740746	TLX2	Island	----	3.21281e-69	++++	1.29326e-48
cg25723149	7	24797680	DFNA5;DFNA5;DFNA5	S_Shore	----	3.53154e-69	++++	2.12089e-49		1	1
cg22017733	5	162936453	MAT2B;MAT2B	S_Shelf	++++	4.61034e-69	----	1.18538e-61
cg08774009	8	49309094		Island	----	5.07597e-69	++++	5.2432e-28			1
cg06928703	22	41417317		N_Shore	----	5.18746e-69	++++	1.19423e-05			1
cg17282395	2	172974014		S_Shore	----	5.55799e-69	++++	4.37097e-07
cg18123677	3	167454339	SERPINI1;SERPINI1	S_Shore	++++	5.63669e-69	----	1.7097e-13
cg03126058	1	3282757	PRDM16;PRDM16		----	5.70883e-69	----	3.93486e-126		1
cg08900043	12	54378896	HOXC10	Island	++++	5.92524e-69	++++	2.10646e-77			1
cg09462806	7	150084		S_Shore	----	6.13182e-69	++++	2.45043e-10
cg13730618	21	36089405	CLIC6		++++	7.49591e-69	----	1.92775e-31		1
cg14701491	3	127634449		Island	----	7.72544e-69	++++	4.37097e-64
cg23254497	19	2495334		S_Shore	++++	7.96153e-69	----	9.28299e-36		1
cg00290758	10	121171859	GRK5		----	8.03039e-69	----	1.10799e-45
cg19749916	6	106441456		N_Shore	----	8.18123e-69	++++	2.63931e-14
cg18257541	3	23244062	UBE2E2	Island	----	9.29283e-69	++++	1.31785e-18
cg21286782	1	113265602	FAM19A3;FAM19A3	Island	----	1.00864e-68	++++	8.65341e-59
cg06699564	8	95651099		N_Shore	----	1.01388e-68	++++	2.45043e-23
cg12727529	3	42307761	CCK	S_Shore	----	1.01618e-68	++++	0.000363647		1
cg14573817	12	107348689	C12orf23	N_Shore	----	1.07881e-68	++++	0.00981748
cg06000330	7	19183231		N_Shore	----	1.1198e-68	++++	6.4171e-09	1	1
cg22566355	12	49943340	KCNH3	Island	----	1.16505e-68	++++	5.14155e-19
cg02623028	1	23003569		Island	----	1.20931e-68	++++	0.000165986		1
cg17871610	19	50936070	MYBPC2	S_Shore	----	1.72675e-68	++++	1.59788e-17
cg14513071	1	47905517	FOXD2;FOXD2	Island	----	1.82151e-68	++++	4.06602e-90
cg02330106	10	131264840	MGMT	N_Shore	----	2.15335e-68	----	1.27653e-18
cg08775137	4	41880319		Island	----	2.25697e-68	++++	3.6627e-10
cg19034028	16	68677364	CDH3	N_Shore	----	2.49667e-68	++++	1.94284e-06			1
cg20174066	15	26108263	ATP10A;ATP10A	Island	----	2.62357e-68	++++	6.30889e-10
cg13982688	9	97401505	FBP1;FBP1	Island	----	2.62849e-68	++++	5.48913e-11
cg23615741	10	101297642		Island	++++	3.18986e-68	----	3.56761e-79
cg22698744	21	36263808	RUNX1	S_Shore	++++	3.44628e-68	----	1.50344e-08
cg04631458	7	1329462		Island	----	3.44628e-68	----	1.25817e-05		1
cg01875596	18	22933696	ZNF521	S_Shelf	++++	3.48891e-68	----	4.41688e-61
cg02007567	16	10912696	FAM18A	Island	----	4.03979e-68	----	3.02755e-06
cg20543544	10	81003657	ZMIZ1	Island	++++	4.33163e-68	++++	7.51886e-05		1
cg04850999	10	77872084	C10orf11	Island	----	4.92841e-68	----	1.0188e-09	1
cg06871560	15	52944233	KIAA1370		++++	4.93169e-68	++++	8.24681e-17
cg18388559	15	41186038	VPS18	N_Shore	----	4.9776e-68	----	5.21369e-34
cg13917662	13	100548513	CLYBL	Island	----	5.11204e-68	++++	1.08209e-138
cg12499235	11	2293173	ASCL2	S_Shore	----	6.00722e-68	++++	3.24331e-06
cg20091689	2	97524862	ANKRD39	S_Shore	----	6.69582e-68	----	2.49405e-22
cg17113856	6	32120895	PPT2;PRRT1;PPT2	N_Shore	----	7.56805e-68	----	3.55121e-07		1
cg27187555	1	3269252	PRDM16;PRDM16		----	8.85999e-68	----	4.571e-29		1
cg07421287	1	111218287	KCNA3	S_Shore	----	9.09281e-68	----	5.89245e-13		1
cg01029669	19	46999840	PNMAL2	S_Shore	++++	9.39448e-68	----	7.85332e-15		1
cg06236559	18	45458303	SMAD2;SMAD2;SMAD2	S_Shore	----	1.0247e-67	++++	6.56466e-52
cg05574272	5	33938213	RXFP3	Island	----	1.25456e-67	++++	1.30801e-08
cg09322513	16	65555681	LOC283867		++++	1.30605e-67	----	3.725e-19
cg00982136	2	201726139	CLK1;CLK1;CLK1;CLK1	N_Shelf	++++	1.35589e-67	----	2.34026e-65
cg22121557	6	28584138		Island	----	1.38999e-67	++++	2.68161e-69			1
cg01446515	13	20805443	GJB6;GJB6;GJB6;GJB6	N_Shore	----	1.40638e-67	++++	2.2373e-14
cg03792162	4	572484		S_Shore	----	1.51164e-67	++++	6.60073e-17
cg06947430	19	51228937	CLEC11A	S_Shore	++++	1.5264e-67	++++	1.43491e-08		1
cg21134096	7	151217883	RHEB	Island	----	1.70576e-67	++++	1.59821e-21
cg09973514	11	58830424		Island	----	1.8202e-67	++++	0.000159263
cg13762320	11	2292905	ASCL2	Island	----	2.01432e-67	++++	5.33501e-68
cg26357744	3	50374304	RASSF1;RASSF1;RASSF1;RASSF1	Island	++++	2.40125e-67	----	5.53176e-22
cg26801014	11	88241769	GRM5;GRM5	Island	----	3.10756e-67	++++	4.68904e-91
cg07309340	5	37833969	GDNF;GDNF;GDNF	N_Shore	----	3.39054e-67	----	2.07105e-22
cg09391066	6	3163814		S_Shore	----	4.31195e-67	----	1.03257e-19
cg18107425	15	90319432	MESP2	N_Shore	----	4.46607e-67	++++	3.46923e-07			1
cg03584056	19	4910798	UHRF1;UHRF1;UHRF1	S_Shore	++++	4.59723e-67	----	1.27194e-14
cg10986043	17	37820495	TCAP	N_Shelf	----	4.61034e-67	----	3.20035e-128
cg23913963	1	17766917	RCC2	S_Shore	----	4.66281e-67	----	3.10854e-112		1
cg09932758	12	58022542	B4GALNT1	S_Shore	----	4.73823e-67	++++	6.71877e-38
cg03014634	16	85205030		Island	----	5.07925e-67	----	5.95148e-29
cg10605681	6	30228153	HLA-L	Island	----	5.31534e-67	++++	0.0014113
cg27272363	8	125951852			++++	6.41382e-67	----	2.83146e-18
cg01103827	21	40554221	PSMG1;PSMG1	N_Shore	++++	6.79747e-67	----	5.37436e-81
cg07380026	5	1296007	TERT;TERT	S_Shore	----	7.00405e-67	++++	7.46312e-05
cg01229998	11	60049447	MS4A4A;MS4A4A		----	8.22386e-67	----	1.41196e-29
cg03164928	16	89005932	CBFA2T3;CBFA2T3	N_Shore	++++	9.47973e-67	----	1.41163e-06
cg00688311	12	133100714	FBRSL1	N_Shore	++++	1.04011e-66	----	8.9059e-15
cg17580614	17	15849512	ADORA2B	Island	----	1.06208e-66	----	2.47175e-23
cg27267310	11	16946393	PLEKHA7	Island	----	1.08077e-66	++++	3.19839e-14
cg13104274	1	169078316	ATP1B1;ATP1B1	S_Shore	----	1.10865e-66	----	3.96437e-24		1
cg20889395	17	48912556	WFIKKN2		----	1.14767e-66	----	1.30211e-14
cg11950360	18	34834690	BRUNOL4;BRUNOL4;BRUNOL4;BRUNOL4	S_Shore	----	1.15291e-66	++++	2.3455e-17			1
cg06996423	10	105236233	CALHM3	S_Shelf	----	1.31621e-66	----	2.7908e-21
cg03306615	11	2292890	ASCL2	Island	----	1.5182e-66	++++	3.20691e-26
cg10593400	1	86044176	DDAH1	S_Shore	----	1.82151e-66	----	0.000240879
cg06522456	19	45311781	BCAM;BCAM	N_Shore	----	1.95694e-66	----	5.19729e-11		1
cg02929431	12	51713220	BIN2		----	1.96612e-66	----	7.05652e-08
cg24134897	11	859670	TSPAN4;TSPAN4;TSPAN4;TSPAN4;TSPAN4;TSPAN4;TSPAN4	S_Shore	++++	2.53635e-66	----	2.14286e-48
cg14260073	6	137244681	SLC35D3	Island	----	2.94688e-66	++++	0.00305542			1
cg03127244	6	33245638	B3GALT4	S_Shore	----	2.99836e-66	----	9.31578e-22
cg24477309	12	109730121	FOXN4	S_Shore	----	3.26397e-66	----	1.12799e-58
cg20893180	8	36957379			----	3.27774e-66	++++	6.69582e-05
cg09715059	6	32223336			----	3.32496e-66	----	1.8143e-67
cg11207515	7	146904205	CNTNAP2		++++	3.51514e-66	----	9.6109e-09
cg12419863	6	144263450	PLAGL1;PLAGL1;PLAGL1;PLAGL1;PLAGL1;PLAGL1;PLAGL1;PLAGL1		----	3.92174e-66	----	6.98438e-101
cg08550421	5	140305947	PCDHA7;PCDHAC1;PCDHA12;PCDHA6;PCDHA10;PCDHA4;PCDHA11;PCDHAC1;PCDHA8;PCDHA6;PCDHA1;PCDHA2;PCDHA1;PCDHA9;PCDHA13;PCDHA5;PCDHA3;PCDHA10	Island	++++	4.06274e-66	++++	0
cg14067873	12	81110706	MYF5	N_Shore	----	4.63002e-66	++++	3.3184e-48			1
cg10272954	3	138725425	PRR23A	Island	----	5.38748e-66	++++	0.00118013			1
cg19719475	3	23849114	UBE2E1;UBE2E1	S_Shore	++++	6.03673e-66	----	1.26702e-51
cg19928597	7	73157383		S_Shelf	----	6.36136e-66	++++	0.00788284			1
cg23574802	14	89017726	PTPN21	Island	----	8.04351e-66	++++	3.65942e-30
cg11927233	5	170816542	NPM1;NPM1;NPM1	S_Shore	++++	8.14516e-66	----	3.62007e-61
cg01711322	1	200842126	GPR25	N_Shore	----	8.24681e-66	++++	6.22692e-09			1
cg04516022	7	155283233		N_Shore	----	9.17478e-66	++++	0.00418407
cg18424208	5	149546337	CDX1	Island	----	9.19446e-66	++++	1.32539e-05			1
cg06756211	1	223936799	CAPN2;CAPN2	Island	----	9.68959e-66	++++	4.91857e-108
cg06648759	13	40892751			----	1.09979e-65	++++	8.03367e-122
cg03390245	1	156819061	NTRK1;INSRR	Island	----	1.1434e-65	++++	5.47273e-07
cg20440891	7	28448103	CREB5	N_Shore	----	1.16341e-65	++++	5.17106e-09
cg18108844	1	2716235		N_Shore	++++	1.39688e-65	----	6.87945e-09
cg20341758	10	90966221	CH25H;CH25H	N_Shore	----	1.61624e-65	++++	2.16221e-06			1
cg09498440	5	72415429	TMEM171;TMEM171	N_Shore	----	1.65723e-65	++++	3.41349e-05			1
cg12114735	19	55668232	TNNI3	Island	++++	1.69855e-65	++++	5.42027e-05
cg11052143	2	202484020	ALS2CR11;ALS2CR11;ALS2CR11;ALS2CR11	S_Shore	----	2.11138e-65	++++	1.42016e-17
cg10020890	16	75025753			----	2.43896e-65	----	1.99629e-06		1
cg26051413	11	2292902	ASCL2	Island	----	2.55864e-65	++++	3.17281e-36
cg17714703	19	4912221	UHRF1;UHRF1	S_Shore	++++	2.61898e-65	----	4.88906e-11		1
cg09161043	1	53068834	GPX7	S_Shore	++++	2.64324e-65	----	7.76479e-46
cg05237436	5	138533428	SIL1;SIL1	N_Shore	++++	2.71964e-65	----	9.80436e-132
cg20262330	14	70826997	COX16	S_Shore	----	2.71997e-65	++++	2.61078e-06			1
cg03682719	6	28584103		Island	----	2.8131e-65	++++	6.12854e-23			1
cg04917197	10	112290331		S_Shore	----	3.22855e-65	++++	4.74806e-06
cg07850592	1	231299396	TRIM67	Island	----	3.33479e-65	++++	5.85638e-42			1
cg06351981	2	220350567	SPEG	S_Shore	----	3.53809e-65	----	4.24965e-11
cg01077274	1	225865487		S_Shore	----	3.85944e-65	++++	2.09826e-14		1
cg03063309	4	24796919	SOD3		----	4.63658e-65	----	2.60914e-05
cg23230486	1	27718269	GPR3	N_Shore	----	5.57111e-65	----	0.000288688			1
cg15502465	1	45250440	BEST4	N_Shore	----	5.6662e-65	----	0.0099388			1
cg13810727	7	155438591	RBM33	S_Shore	++++	8.84688e-65	----	5.42027e-40
cg00348467	17	43222121		Island	----	9.68631e-65	----	6.20724e-20			1
cg04037228	3	45636386	LIMD1	S_Shore	++++	1.01355e-64	----	5.6039e-51
cg16619991	5	52096811	ITGA1;PELO	S_Shore	++++	1.24079e-64	----	8.45667e-21		1
cg02714303	13	76334728	LMO7;LMO7		++++	1.26211e-64	----	1.57132e-30
cg18569661	12	678853	NINJ2	N_Shore	----	1.26375e-64	----	6.78763e-76
cg10505785	20	23028890	THBD	Island	----	1.30605e-64	++++	4.55132e-07
cg19438750	15	91768905	SV2B;SV2B		++++	1.33982e-64	----	1.95923e-19
cg01883408	5	132083691	CCNI2	Island	----	1.53132e-64	++++	4.23653e-68			1
cg00581154	1	3123695	PRDM16;PRDM16		----	1.56017e-64	----	5.89573e-17		1
cg21917728	6	41471064		N_Shore	----	1.76347e-64	++++	3.65286e-11
cg19712189	19	33210851	TDRD12;TDRD12	Island	++++	1.87135e-64	++++	0.00623347			1
cg02909793	20	56324509		S_Shore	++++	1.89726e-64	++++	2.57143e-57
cg25915982	7	50849415	GRB10	N_Shore	++++	1.93333e-64	----	3.28889e-27
cg18305433	6	28972963	ZNF311;ZNF311		----	1.96022e-64	++++	2.67407e-26		1	1
cg23450038	19	2462961		S_Shore	----	2.04318e-64	++++	2.23861e-24
cg10059484	4	183839326	DCTD;DCTD	S_Shore	----	2.08974e-64	----	1.12144e-88
cg03913456	2	97000924	NCAPH	N_Shore	----	2.09105e-64	----	1.64018e-05			1
cg06433694	19	44905788	ZNF285A		----	2.14975e-64	++++	1.20767e-29
cg01035815	6	33600828	ITPR3	N_Shore	----	2.22811e-64	++++	1.168e-09
cg14244402	9	130681102		S_Shore	----	2.23238e-64	----	3.69549e-14
cg05107535	16	3242850		Island	++++	2.38485e-64	++++	1.8625e-26
cg23741520	15	83954231	BNC1	S_Shore	----	2.82425e-64	++++	9.49285e-43
cg16907566	8	121136534	COL14A1	N_Shore	----	3.00492e-64	++++	0.00554159
cg22202121	6	87866253	ZNF292	S_Shore	++++	3.20888e-64	----	1.13357e-54
cg12037450	1	85513124	MCOLN3	N_Shore	----	4.35458e-64	++++	4.03323e-100
cg15125338	17	44899394		S_Shelf	----	4.40376e-64	++++	2.46552e-15			1
cg00642460	5	176827697	PFN3	Island	----	4.72183e-64	++++	6.62368e-12
cg00154986	15	90320609	MESP2	S_Shore	----	4.80381e-64	++++	6.66303e-07		1
cg25985734	19	58908421		Island	----	6.26299e-64	++++	1.44114e-19
cg25309343	19	51226207	CLEC11A	N_Shore	----	6.51219e-64	----	1.72216e-29
cg03714773	7	91764589	CYP51A1;CYP51A1	S_Shore	----	7.05652e-64	++++	0.000104831
cg18788741	8	53476943	FAM150A	N_Shore	----	9.13215e-64	++++	1.24833e-06
cg20729813	4	7502429	SORCS2		----	9.8601e-64	----	1.49426e-07
cg23950233	6	33245739	B3GALT4	S_Shore	----	1.22932e-63	----	7.71233e-35
cg15707833	8	131455276		Island	++++	1.27883e-63	++++	3.83649e-114
cg24312719	1	93251184	EVI5	S_Shore	----	1.36048e-63	++++	4.53165e-11
cg25349939	2	144855085	GTDC1;GTDC1;GTDC1		++++	1.67461e-63	----	2.6239e-21
cg07444414	6	32117377	PRRT1	N_Shore	----	2.13466e-63	++++	1.27588e-08			1
cg24724587	1	86044103	DDAH1	S_Shore	----	2.72587e-63	----	0.000156903
cg21674704	8	131455249		Island	++++	2.75703e-63	++++	1.80676e-92
cg21899500	3	51740850	GRM2;GRM2	Island	++++	3.02886e-63	++++	4.16439e-146		1
cg16686158	22	30476098	HORMAD2	Island	----	3.46596e-63	++++	2.8108e-60
cg23737263	2	43328424		S_Shore	----	3.61023e-63	----	1.7556e-34
cg09421307	8	17270452	MTMR7	N_Shore	----	4.23325e-63	++++	0.00499071
cg19922871	1	46913532		N_Shore	----	4.3513e-63	++++	1.32572e-16
cg00567703	12	54413101	HOXC4;HOXC5;HOXC6	Island	----	4.43328e-63	++++	3.26823e-42			1
cg19235307	3	129160154	IFT122;IFT122;MBD4;IFT122;IFT122	S_Shore	++++	4.89234e-63	----	4.42672e-143		1
cg15967709	6	28584081		Island	----	5.6662e-63	++++	1.1798e-33			1
cg09248660	6	24969848			----	6.06296e-63	----	6.42366e-11		1
cg18836847	9	140136534	TUBB2C	Island	++++	6.75156e-63	----	1.87988e-16
cg01727145	2	220313422	SPEG	Island	----	7.65658e-63	++++	5.24976e-37
cg02635932	10	18549778	CACNB2;CACNB2;CACNB2;CACNB2;CACNB2;CACNB2;CACNB2;CACNB2		----	9.04034e-63	++++	1.99924e-23		1
cg16351246	13	20751345		Island	----	9.56171e-63	++++	2.07793e-08
cg09796146	16	33937240		N_Shore	----	1.05126e-62	++++	9.37808e-38
cg09126090	1	1534514		Island	----	1.06077e-62	++++	9.40104e-07			1
cg02834765	1	155214859	GBA;GBA;GBA;GBA		----	1.10242e-62	----	6.06296e-07
cg01443426	22	38201594	H1F0	Island	----	1.19226e-62	++++	9.7191e-12
cg24592500	1	2863801			----	1.22046e-62	----	1.21587e-08
cg10077239	14	30397686	PRKD1	S_Shore	----	1.27293e-62	++++	3.93158e-72
cg22524514	11	65779676	CST6	Island	----	1.39327e-62	++++	1.20833e-32
cg14575854	17	37896175	GRB7;GRB7		----	1.47885e-62	----	1.79856e-07			1
cg06426416	4	5710403	EVC2;EVC2	Island	----	1.58411e-62	++++	1.6251e-76
cg07758738	18	12911528		Island	----	1.61264e-62	++++	5.57438e-239
cg00768409	15	83954392	BNC1	S_Shore	----	1.72478e-62	++++	0.00186184
cg14608275	3	172429421	NCEH1;NCEH1;NCEH1;NCEH1	S_Shore	----	1.78348e-62	----	2.93901e-39
cg06710259	5	55775841		N_Shore	----	2.07203e-62	----	4.52837e-10
cg03068497	7	30635838	GARS	S_Shore	++++	2.10581e-62	----	6.97454e-23
cg12103569	12	132258560	SFRS8		++++	2.28747e-62	++++	1.76675e-76		1
cg25946389	10	131265073	MGMT	Island	----	2.40289e-62	++++	3.81354e-08
cg27464065	12	12940610	APOLD1;APOLD1	S_Shore	----	2.49077e-62	----	5.44322e-30
cg24309739	4	164088478	NAF1;NAF1	S_Shore	----	2.55995e-62	++++	2.95246e-29			1
cg11419186	16	81477373	CMIP	N_Shore	----	2.71768e-62	----	2.65275e-135
cg14422240	6	37425031	FTSJD2		++++	3.00197e-62	++++	1.05979e-07
cg06897661	16	50322074	ADCY7;ADCY7		----	3.07772e-62	++++	1.42901e-35		1
cg09190051	15	57026056	ZNF280D;ZNF280D;ZNF280D	Island	----	3.10723e-62	++++	5.03662e-23
cg26278103	7	124404244	GPR37	Island	----	3.21412e-62	++++	1.68412e-43			1
cg24897141	5	139283199	NRG2;NRG2;NRG2;NRG2	N_Shore	----	4.30867e-62	++++	1.29391e-24
cg22967717	5	92695561			++++	4.56772e-62	----	3.27348e-45
cg01419914	17	79374691	BAHCC1	Island	++++	4.58083e-62	----	9.69287e-19
cg23823908	1	71512485	PTGER3;PTGER3;PTGER3;PTGER3;PTGER3;PTGER3;PTGER3;PTGER3;PTGER3;PTGER3	Island	----	4.80053e-62	++++	0.000362335			1
cg01689657	7	91764605	CYP51A1;CYP51A1	S_Shore	----	4.98416e-62	++++	4.69888e-06		1
cg01373189	13	33002820	N4BP2L1;N4BP2L1	S_Shore	----	5.33501e-62	----	2.15663e-32
cg07363543	1	224691275			++++	5.39076e-62	++++	3.06099e-26
cg00327072	5	172110477	NEURL1B	Island	----	5.44322e-62	++++	2.75768e-176		1
cg18498241	11	69286352		Island	----	5.64652e-62	++++	0.00020153
cg09667394	1	78011748	AK5;AK5		++++	5.81376e-62	++++	3.95126e-65
cg00793186	5	139283100	NRG2;NRG2;NRG2;NRG2	N_Shore	----	5.88917e-62	++++	4.16439e-98
cg15246619	8	21905462	FGF17	Island	----	7.41393e-62	++++	9.77157e-99
cg23097139	15	75918757	SNUPN;SNUPN;SNUPN	S_Shore	----	7.55165e-62	----	3.76107e-55
cg09618778	11	66838934	RHOD	Island	----	1.0106e-61	++++	7.73528e-17
cg04601137	19	1512314	ADAMTSL5	N_Shore	++++	1.1116e-61	----	9.59122e-26
cg05384271	19	6464029	CRB3;CRB3	Island	----	1.18046e-61	++++	4.67593e-07
cg01341123	10	131265071	MGMT	Island	----	1.4923e-61	++++	0.000909608
cg24518098	1	2146288		S_Shore	----	1.53394e-61	----	3.39054e-57
cg14652056	6	29760688	HCG4	Island	----	1.55329e-61	++++	6.75156e-22
cg16683508	8	57233314	SDR16C5	S_Shore	++++	1.56607e-61	----	7.33523e-19
cg00930606	22	31740944	PATZ1;PATZ1;PATZ1;PATZ1	N_Shore	++++	1.58706e-61	----	4.71527e-16
cg11683482	1	44678623	DMAP1;DMAP1;DMAP1	N_Shore	----	1.85955e-61	----	5.45306e-33
cg25311764	15	59907427	GCNT3		++++	1.88611e-61	----	2.23795e-41
cg09690072	17	37324234		S_Shelf	++++	2.01006e-61	----	4.52837e-07
cg20308817	19	51225848	CLEC11A	N_Shore	----	2.0294e-61	----	0.00256028
cg08569850	2	118618054		Island	----	2.14515e-61	++++	9.96831e-12
cg05037389	1	150230233	CA14;CA14		----	2.24877e-61	++++	3.40693e-29
cg10424681	6	4079350	C6orf201;C6orf146;C6orf146	Island	----	2.30255e-61	++++	3.86272e-43			1
cg05081614	14	31494237	STRN3;STRN3;AP4S1;AP4S1	N_Shore	++++	2.32944e-61	----	2.70981e-76
cg26644674	10	3138505	PFKP		----	2.3901e-61	----	1.49033e-12
cg21716282	3	127634587		Island	----	2.48421e-61	++++	7.39426e-11
cg22608655	1	154933512	PYGO2	N_Shore	++++	3.02427e-61	----	2.18286e-32		1
cg00025211	1	145588627	NUDT17	N_Shore	----	3.03476e-61	----	9.59778e-06
cg10277175	2	97525009	ANKRD39	S_Shore	----	3.29872e-61	----	4.52509e-34
cg18018313	2	227657192	IRS1	S_Shore	++++	3.38398e-61	----	2.92819e-92
cg11851910	21	34482086			----	4.35786e-61	++++	1.79233e-11			1
cg25414605	11	67182672	ATPGD1;ATPGD1	N_Shore	----	4.72839e-61	----	3.59712e-31
cg23196549	4	110480700	CCDC109B	N_Shore	++++	4.74151e-61	----	1.65002e-12		1
cg25360180	12	101110281		Island	----	4.8989e-61	++++	4.30211e-12			1
cg21429551	7	30635762	GARS	S_Shore	++++	4.96448e-61	----	2.23664e-26			1
cg24057514	11	2293181	ASCL2	S_Shore	----	5.06613e-61	++++	0.0015605			1
cg18543610	13	100627929		N_Shelf	----	5.28255e-61	++++	1.59001e-18
cg22061523	17	76183551	AFMID;TK1;AFMID;AFMID	S_Shore	++++	5.56455e-61	----	2.27402e-10			1
cg00493304	2	48844908	GTF2A1L;STON1-GTF2A1L;GTF2A1L	Island	----	8.32879e-61	++++	0.000197989			1
cg25129541	12	53273196		N_Shore	----	9.0469e-61	----	8.43044e-59
cg22669060	21	34774882	IFNGR2	N_Shore	----	9.42727e-61	++++	0.000107225
cg19694241	10	104211488	C10orf95	S_Shore	++++	9.49613e-61	----	3.09575e-44
cg25417405	15	50474129	SLC27A2;SLC27A2	N_Shore	----	1.06766e-60	----	0.000139753
cg23580000	16	50322156	ADCY7		----	1.16997e-60	++++	1.43163e-30		1
cg06134567	22	46658398	PKDREJ	Island	----	1.22866e-60	++++	1.18472e-12
cg05531482	7	124430753			++++	1.43229e-60	----	5.24648e-43
cg13697378	1	68512845	DIRAS3	Island	----	1.48902e-60	++++	1.61592e-81			1
cg16382322	5	141061902	ARAP3		----	1.55525e-60	++++	1.29555e-48
cg01324550	17	46676099	LOC404266;LOC404266;LOC404266;LOC404266;HOXB6;LOC404266	S_Shore	++++	1.84217e-60	----	4.7579e-54		1
cg21402071	15	78933902	CHRNB4	S_Shore	----	1.86316e-60	++++	5.92524e-71
cg27332337	1	115397616	SYCP1;SYCP1	Island	----	1.913e-60	++++	1.15357e-08			1
cg16202734	17	37321890	ARL5C	Island	----	1.9694e-60	++++	3.63975e-43
cg20758219	3	138738597	PRR23B;PRR23B	N_Shore	----	1.98317e-60	++++	0.00631545			1
cg18877271	11	1952638	TNNT3;TNNT3;TNNT3;TNNT3	S_Shore	----	1.99137e-60	----	5.66948e-21		1
cg23656083	6	88757371	SPACA1	Island	----	2.31796e-60	++++	0.00402667
cg25324047	10	22765840		Island	----	2.68653e-60	++++	9.57811e-69
cg24779941	14	103524901	CDC42BPB	S_Shore	----	2.74194e-60	++++	7.29917e-14
cg04199609	12	6310100	CD9	Island	----	2.75604e-60	----	2.14647e-12
cg09814029	1	39212920			----	3.10264e-60	++++	4.54804e-13
cg06829788	1	228581405	TRIM11	N_Shore	++++	3.28561e-60	----	9.11576e-98
cg22176709	3	193859889		S_Shore	----	3.5053e-60	++++	5.77113e-05
cg04976697	22	30938784		S_Shore	----	3.79058e-60	----	3.13805e-115
cg27175287	1	47883234	FOXE3;FOXE3	S_Shore	----	3.87256e-60	++++	3.95453e-17		1
cg27661846	12	120832521		N_Shelf	----	3.9283e-60	++++	1.34343e-29
cg08814800	4	174421377		Island	----	4.4136e-60	++++	1.16144e-24
cg06563089	12	75601157	KCNC2;KCNC2;KCNC2	Island	----	4.85955e-60	++++	6.0105e-77
cg17128799	1	2458466	PANK4	S_Shore	++++	4.89234e-60	----	2.80162e-28		1
cg06154313	10	95360494	RBP4	Island	----	4.98088e-60	++++	3.47251e-74
cg11028075	10	97200911	SORBS1;SORBS1;SORBS1;SORBS1;SORBS1;SORBS1;SORBS1;SORBS1;SORBS1;SORBS1;SORBS1;SORBS1		++++	5.22681e-60	----	4.46279e-07
cg23044186	5	141228416		N_Shore	----	5.23992e-60	----	4.6169e-67
cg14950829	13	53419617	PCDH8;PCDH8	N_Shore	----	5.45306e-60	++++	2.275e-15			1
cg20699586	1	227748719		Island	----	5.74162e-60	++++	1.40737e-74			1
cg06540458	1	226951747			++++	7.24014e-60	++++	8.25665e-09
cg23266594	5	149546691	CDX1	Island	----	7.63363e-60	++++	9.55187e-15			1
cg05721773	1	207083336	FAIM3;FAIM3;FAIM3	S_Shore	----	8.05335e-60	----	3.41021e-196
cg17567838	6	33167488	SLC39A7;RXRB;SLC39A7	N_Shore	++++	8.49274e-60	----	1.67428e-79
cg00907204	7	92461971	CDK6;CDK6	N_Shore	++++	9.44694e-60	----	6.31545e-21
cg06382930	11	65102417	DPF2	S_Shore	++++	9.90929e-60	----	3.84633e-08		1
cg11084718	12	93834066	UBE2N	N_Shore	++++	9.96175e-60	----	3.65286e-54		1
cg26422151	10	88136949		Island	----	1.15226e-59	++++	5.22025e-50
cg24170248	19	56015067	SSC5D	Island	++++	1.3549e-59	++++	7.168e-08			1
cg25694915	2	169658981	NOSTRIN;NOSTRIN;NOSTRIN;NOSTRIN		++++	1.59296e-59	----	1.68543e-177
cg12208770	1	1361666	TMEM88B	Island	----	1.89726e-59	----	4.67593e-11
cg10187674	17	67323922	ABCA5	S_Shore	----	1.98842e-59	++++	5.87934e-14
cg14362178	2	79007750			++++	2.13105e-59	----	8.89934e-07
cg20066001	1	2406733	PLCH2	N_Shelf	++++	2.14843e-59	----	2.28943e-15
cg08187246	1	160054219	KCNJ9	Island	----	2.25467e-59	++++	3.32496e-43			1
cg01963297	1	154841980	KCNN3		++++	2.32353e-59	----	1.7274e-16			1
cg00052932	2	190539778	ANKAR	S_Shore	----	2.68062e-59	----	2.00088e-32
cg10059056	11	46355283	DGKZ	S_Shore	----	3.57089e-59	----	8.53537e-08
cg23092538	2	60778973	BCL11A;BCL11A;BCL11A	Island	----	3.76435e-59	++++	3.98077e-10			1
cg04181327	2	91776322		N_Shore	++++	4.30211e-59	++++	0.000982075			1
cg21009965	1	75593596	LHX8	N_Shelf	----	4.78085e-59	++++	2.45207e-74
cg13756273	20	57594513	TUBB1;TUBB1		----	4.83004e-59	----	1.40671e-80
cg06362543	20	42135794		Island	----	5.18418e-59	++++	5.46946e-27
cg14527456	14	74100987		Island	----	7.06307e-59	++++	9.73878e-157
cg17200690	6	33245619	B3GALT4	S_Shore	----	7.08275e-59	----	1.38278e-13
cg18611245	20	62338235	ZGPAT;ZGPAT;ZGPAT;ARFRP1;ARFRP1	N_Shore	++++	7.10242e-59	----	6.89584e-06
cg15580684	1	4770711	AJAP1;AJAP1	N_Shore	----	7.35163e-59	++++	0.000115226
cg23351289	19	34849945		N_Shore	----	7.35819e-59	----	0.00253241
cg08757448	10	104613767	C10orf32;C10orf32	N_Shore	----	7.71888e-59	++++	0.000370205			1
cg04672837	16	48644449	N4BP1	S_Shore	----	7.7943e-59	----	0.00263439
cg07917609	5	33938225	RXFP3	Island	----	7.84021e-59	++++	2.74129e-08
cg21944224	3	184301211		Island	----	1.0352e-58	++++	1.80643e-13			1
cg25318976	1	5727352			----	1.14767e-58	----	8.42716e-07
cg16776065	11	6340486	PRKCDBP	Island	----	1.35162e-58	++++	1.57722e-107
cg03579624	3	75717248		N_Shore	----	1.38933e-58	++++	1.63985e-63
cg24630057	7	1369318		N_Shore	----	1.88086e-58	----	2.43371e-14
cg12323274	18	34834605	BRUNOL4;BRUNOL4;BRUNOL4;BRUNOL4	Island	----	1.89136e-58	++++	4.94809e-07			1
cg04764624	17	29718129	RAB11FIP4	N_Shore	----	1.94808e-58	++++	1.6369e-42
cg14095048	22	25342876			++++	2.11958e-58	----	1.30506e-135
cg03287519	8	107231654		S_Shelf	++++	2.13269e-58	----	1.92808e-16
cg17866373	1	228651353		N_Shore	++++	2.17729e-58	----	3.98077e-05
cg02336827	3	45636190	LIMD1	S_Shore	++++	2.17991e-58	----	1.11816e-137
cg12054341	19	19007074	LASS1;GDF1;LASS1	Island	----	2.58389e-58	++++	0.00528911			1
cg10061384	1	2466275		N_Shore	++++	2.60193e-58	----	0.0026416		1	1
cg26035489	22	30164162	ZMAT5;UCRC;UCRC;ZMAT5	S_Shore	++++	2.70554e-58	----	3.46596e-10
cg06322988	3	138725189	PRR23A	Island	----	3.59384e-58	++++	8.44683e-14			1
cg05339588	3	134125870		Island	----	4.4923e-58	++++	4.17751e-13
cg15870818	3	180319597	TTC14;TTC14	N_Shore	----	4.53493e-58	++++	4.02667e-30			1
cg03616221	10	91295855	SLC16A12	Island	----	4.76774e-58	++++	6.89584e-49
cg21579239	15	43211292	TTBK2	N_Shore	++++	4.83988e-58	----	5.08581e-12
cg27248887	2	207025417	EEF1B2;EEF1B2;SNORD51;NDUFS1;EEF1B2	S_Shore	++++	4.86283e-58	----	1.48836e-59
cg10940462	11	64479015	NRXN2;NRXN2	Island	----	4.88251e-58	++++	1.12275e-25
cg24381155	10	103289745	BTRC;BTRC		++++	4.92841e-58	----	6.42366e-66
cg08572336	19	51165404	SHANK1	Island	----	5.39732e-58	++++	0.00118505			1
cg16901519	22	18560646	PEX26;PEX26	Island	----	5.54159e-58	++++	0.00102011
cg07322064	6	166720433	PRR18;PRR18	Island	----	5.74817e-58	++++	1.00601e-37			1
cg18408273	4	115484805			++++	6.6827e-58	----	9.06329e-21
cg00428457	2	119887680			----	6.84338e-58	++++	1.60608e-05
cg19598416	1	223936812	CAPN2;CAPN2	Island	----	7.07619e-58	++++	4.03323e-163
cg21577036	15	90844799			----	7.19424e-58	----	2.07039e-34
cg02930239	3	138763670	PRR23C;PRR23C	Island	----	7.96809e-58	++++	5.3678e-11
cg19307528	8	74004928	C8orf84	N_Shore	----	8.7813e-58	++++	2.49175e-12
cg11002686	7	55412682		Island	----	9.78796e-58	++++	4.43e-15
cg16015295	17	78793479	RPTOR;RPTOR	N_Shelf	++++	1.04241e-57	++++	0.00481037
cg09704401	2	64996998		S_Shore	----	1.08963e-57	----	1.09553e-47
cg06271237	6	144263369	PLAGL1;PLAGL1;PLAGL1;PLAGL1;PLAGL1;PLAGL1;PLAGL1;PLAGL1		----	1.15029e-57	----	5.58422e-18
cg09350536	14	23236725	OXA1L	S_Shore	++++	1.15324e-57	----	4.26276e-44
cg14800351	11	31817881	PAX6;PAX6;PAX6	N_Shelf	----	1.44704e-57	++++	2.36223e-48
cg12608507	2	207025477	EEF1B2;EEF1B2;SNORD51;NDUFS1;SNORA41;EEF1B2	S_Shore	++++	1.45229e-57	----	8.11565e-27
cg26458452	7	140341135		Island	----	1.5346e-57	++++	9.32234e-07
cg14950751	17	6947464	SLC16A11	Island	----	1.59886e-57	++++	4.60051e-40
cg09143801	1	151105049	SEMA6C	Island	----	1.79626e-57	++++	1.03585e-09			1
cg09251959	1	32170507	COL16A1	S_Shore	----	1.90546e-57	----	1.14931e-09
cg09349343	6	33245717	B3GALT4	S_Shore	----	2.21467e-57	----	4.54476e-25
cg26857521	1	2350123		S_Shelf	++++	2.67013e-57	----	7.1844e-06		1
cg22434763	1	53098630	FAM159A	Island	----	2.80752e-57	++++	1.27457e-23
cg21486470	14	103011554		Island	----	2.84753e-57	++++	0.000178184
cg05368740	19	36246882	HSPB6	Island	----	3.09575e-57	++++	3.73812e-120
cg15398400	10	118429481	C10orf82	Island	----	3.12789e-57	++++	3.79386e-11			1
cg04078896	20	62338273	ZGPAT;ZGPAT;ZGPAT;ARFRP1;ARFRP1	N_Shore	++++	3.2761e-57	----	5.97115e-07
cg04297507	4	108749432	SGMS2	S_Shelf	++++	3.31184e-57	----	7.14177e-06
cg10632094	3	23244068	UBE2E2	Island	----	3.584e-57	++++	1.25293e-13
cg09642020	9	139379173	C9orf163	Island	----	3.8037e-57	----	5.31206e-143
cg26331343	3	156807520		S_Shore	----	4.01356e-57	----	1.34867e-50
cg07945733	10	118429485	C10orf82	Island	----	4.17423e-57	++++	3.8824e-10			1
cg06861037	16	50278918		N_Shore	----	4.36114e-57	----	5.07925e-25
cg13515842	9	127215440	GPR144	Island	----	4.43655e-57	++++	5.35141e-22			1
cg05364567	17	5019761	ZNF232	Island	----	5.3219e-57	++++	2.6498e-09			1
cg13951074	9	1045628		Island	----	5.63669e-57	++++	2.31239e-20
cg23793397	17	36829758	C17orf96	Island	----	5.64652e-57	++++	1.47197e-56
cg17300353	2	137522211		N_Shore	----	6.20724e-57	++++	1.40507e-35
cg00340855	6	30458586	HLA-E	S_Shore	++++	6.75156e-57	----	7.82053e-80
cg00137234	4	155703138	RBM46	Island	----	7.22375e-57	++++	0.00436769
cg13010299	20	34129465	ERGIC3;ERGIC3	N_Shore	----	7.49263e-57	----	1.93956e-31			1
cg18303477	10	94180046		N_Shore	----	7.70249e-57	++++	1.1962e-08
cg17103217	6	33245721	B3GALT4	S_Shore	----	8.08286e-57	----	1.58837e-20
cg21251203	9	14238640	NFIB		++++	1.11193e-56	----	1.71462e-16
cg14265704	2	71131201	VAX2	Island	----	1.35687e-56	++++	1.79233e-20
cg05001715	5	92956474	FAM172A;FAM172A;FAM172A;FAM172A;MIR2277	Island	++++	1.43819e-56	++++	5.23008e-22		1
cg00821310	1	6420733	ACOT7;ACOT7;ACOT7;ACOT7		----	1.45e-56	----	4.18079e-54		1
cg03466562	1	2220317	SKI	N_Shore	----	1.4618e-56	----	8.42388e-17
cg25228625	17	8127373	C17orf44	S_Shore	----	1.50672e-56	----	1.1057e-07
cg10418289	14	23308294	MMP14	S_Shore	++++	1.53886e-56	----	8.39437e-96
cg26883837	21	46798244		N_Shore	----	1.54345e-56	++++	0.00033184			1
cg21475150	2	101618248	RPL31;RPL31;RPL31	Island	----	1.58411e-56	++++	5.98099e-77			1
cg07856667	10	94455710		Island	++++	1.67691e-56	----	4.05291e-21		1
cg16028555	11	75922172		Island	----	1.74839e-56	++++	1.63952e-23
cg18947553	1	227747468		Island	----	2.1304e-56	++++	0.000409225			1
cg27460040	8	38648995	TACC1;TACC1;TACC1	S_Shelf	----	2.14778e-56	----	0.00323085
cg27629992	5	77255129		S_Shore	----	2.25992e-56	++++	6.6368e-32			1
cg23973393	19	50708921	MYH14;MYH14;MYH14	S_Shore	----	2.47208e-56	++++	1.32867e-15
cg01811796	1	26233565	STMN1;STMN1;STMN1;STMN1	Island	----	2.63931e-56	++++	0.000204547
cg21282539	7	129464704		N_Shore	----	2.87015e-56	++++	1.18079e-74
cg00965168	1	227974541		Island	++++	3.27675e-56	++++	6.50891e-05
cg17641649	11	62693039		N_Shore	----	3.82665e-56	++++	6.13838e-83
cg25926515	10	70321889	TET1	S_Shore	----	3.83321e-56	++++	0.00952236
cg09726279	17	4457835	MYBBP1A;MYBBP1A	N_Shore	++++	3.94798e-56	----	2.06515e-51		1
cg00934355	9	1049244	DMRT2;DMRT2;DMRT2	N_Shore	----	4.18407e-56	++++	3.86928e-16
cg13635007	8	29210154		N_Shore	----	4.24309e-56	++++	1.56411e-160
cg05911990	7	112063449	IFRD1;IFRD1		----	4.53493e-56	----	0.00796153
cg03308494	12	58013267	SLC26A10	Island	----	4.6792e-56	++++	9.71255e-40
cg02022136	10	131265059	MGMT	Island	----	4.87923e-56	++++	0.00517106
cg01620611	17	71306145	CDC42EP4	N_Shore	----	5.09564e-56	----	3.53809e-13
cg05668996	5	122431419	PRDM6	Island	----	5.78752e-56	++++	1.41294e-08
cg26884773	1	235256863			----	6.09247e-56	----	4.37425e-14
cg25085245	7	100032816		N_Shore	++++	6.24987e-56	----	5.27927e-78
cg03025830	8	21905599	FGF17	Island	----	7.2631e-56	++++	9.88306e-71
cg04510282	5	77253378		N_Shore	----	7.64019e-56	++++	1.45754e-38		1
cg18902090	5	140306249	PCDHA7;PCDHA12;PCDHA6;PCDHAC1;PCDHA10;PCDHA4;PCDHA11;PCDHA8;PCDHA6;PCDHA1;PCDHA2;PCDHA1;PCDHA9;PCDHA13;PCDHA5;PCDHA3;PCDHAC1;PCDHA10	Island	++++	7.78446e-56	++++	0
cg03646329	13	48987165	LPAR6;LPAR6;LPAR6;RB1;LPAR6		++++	9.31578e-56	++++	0.000125424
cg21235823	14	93260203	GOLGA5	N_Shore	----	1.16603e-55	++++	2.8977e-13
cg05883874	11	7041196	ZNF214;NLRP14	Island	----	1.33326e-55	++++	6.9188e-14
cg11542394	15	101419011	ALDH1A3	N_Shore	----	1.36704e-55	++++	0.00325642
cg00900933	17	37322028	ARL5C;ARL5C	Island	----	1.37687e-55	++++	9.39776e-05
cg16567172	7	75931606	HSPB1	N_Shore	----	1.51558e-55	----	2.53962e-23
cg17041511	17	61509620		N_Shelf	----	1.58772e-55	----	5.77441e-14
cg02113429	20	18036013	OVOL2	N_Shore	----	1.65067e-55	++++	2.42256e-13
cg20912272	3	128765374		Island	----	1.87824e-55	++++	6.4958e-27
cg03129884	2	95692727	MAL;MAL;MAL;MAL	S_Shore	----	2.02711e-55	++++	1.05815e-11
cg16451872	15	25684818	UBE3A	S_Shore	----	2.11302e-55	++++	0.000432507
cg00747152	19	39339713	HNRNPL;HNRNPL	N_Shore	++++	2.14811e-55	----	8.14188e-28		1
cg13552742	14	77229061	VASH1;VASH1	S_Shore	----	2.23959e-55	++++	3.88895e-10			1
cg03650189	19	10405083	ICAM5	Island	----	2.28156e-55	++++	9.60106e-49			1
cg12810800	2	159788345			++++	2.28681e-55	----	3.69221e-24
cg17372101	7	147500722	CNTNAP2		++++	2.34518e-55	----	5.41043e-220
cg02902477	6	26197071	HIST1H3D	Island	++++	2.60291e-55	----	5.1186e-10		1
cg19497517	8	145028257	PLEC1;PLEC1;PLEC1	Island	----	2.68489e-55	----	1.08405e-63
cg01978236	6	32191479	NOTCH4		----	2.69702e-55	----	8.19763e-35
cg13708016	3	126007563		S_Shore	----	2.74653e-55	++++	0.000610231		1
cg00679731	2	176979345		N_Shore	++++	2.8731e-55	++++	2.79473e-08
cg16604658	12	64847188	TBK1	S_Shore	++++	2.92393e-55	----	8.6239e-235
cg19164987	12	54413000	HOXC4;HOXC5;HOXC6	Island	----	3.01246e-55	++++	1.56804e-37			1
cg11967480	10	112290198		Island	----	3.26692e-55	++++	1.63723e-64
cg10635895	12	2339439	CACNA1C;CACNA1C;CACNA1C;CACNA1C;CACNA1C;CACNA1C;CACNA1C;CACNA1C;CACNA1C;CACNA1C;CACNA1C;CACNA1C;CACNA1C;CACNA1C;CACNA1C;CACNA1C;CACNA1C;CACNA1C;CACNA1C;CACNA1C;CACNA1C;CACNA1C;CACNA1C	Island	----	3.93814e-55	++++	2.46716e-27
cg19234983	1	211688020		N_Shore	----	4.28244e-55	----	3.73812e-65		1
cg11136751	3	46608069	LRRC2;LRRC2	S_Shore	----	4.43328e-55	----	3.9447e-13			1
cg08832695	17	46676375	LOC404266;LOC404266;LOC404266;LOC404266;HOXB6;LOC404266	S_Shore	++++	4.75134e-55	----	2.25107e-36
cg05330056	5	37834102	GDNF;GDNF;GDNF	N_Shore	----	4.94809e-55	----	2.95901e-22
cg06005318	6	30690213	TUBB	S_Shore	++++	5.68915e-55	----	6.34168e-14
cg05867134	16	31009035	STX1B	Island	----	5.93836e-55	++++	1.59427e-30
cg03854238	6	22071933	FLJ22536		++++	6.21708e-55	----	3.78402e-10
cg00463502	17	48912548	WFIKKN2		----	6.32857e-55	----	3.82009e-10			1
cg00830285	7	149119905		Island	----	6.79747e-55	++++	8.25993e-13
cg05142520	12	49364426	WNT10B	Island	----	6.87945e-55	++++	2.61373e-79
cg07485775	5	172110569	NEURL1B	Island	----	7.24014e-55	++++	2.01334e-145
cg07610777	13	20805380	GJB6;GJB6;GJB6;GJB6	N_Shore	----	8.53865e-55	++++	4.51525e-12		1
cg03110795	7	1329410		Island	----	1.00864e-54	----	5.15795e-19			1
cg22878489	6	33245701	B3GALT4	S_Shore	----	1.03421e-54	----	8.46323e-48
cg26730619	19	57743416	AURKC;AURKC;AURKC	S_Shore	++++	1.21817e-54	++++	0.000163428
cg01290904	4	5708474	EVC2;EVC2	N_Shore	----	1.23489e-54	----	8.39109e-30
cg07197092	2	79008089			++++	1.29424e-54	----	3.45284e-22
cg09576209	12	2339614	CACNA1C;CACNA1C;CACNA1C;CACNA1C;CACNA1C;CACNA1C;CACNA1C;CACNA1C;CACNA1C;CACNA1C;CACNA1C;CACNA1C;CACNA1C;CACNA1C;CACNA1C;CACNA1C;CACNA1C;CACNA1C;CACNA1C;CACNA1C;CACNA1C;CACNA1C;CACNA1C	Island	----	1.39786e-54	++++	3.63647e-10
cg23409374	19	49934742	SLC17A7	Island	----	1.45065e-54	++++	1.92218e-07			1
cg00362569	4	5724005	EVC		++++	1.58378e-54	----	0.00178807
cg18195080	10	124639012	LOC399815;FAM24B;FAM24B	Island	----	1.62969e-54	++++	6.35808e-07			1
cg17662369	5	179333958	TBC1D9B;TBC1D9B	N_Shore	++++	1.64936e-54	----	3.54793e-49
cg15650298	8	144896694	SCRIB;SCRIB;MIR937	N_Shore	++++	1.752e-54	----	4.74151e-54
cg01297756	13	100548415	CLYBL	Island	----	1.75528e-54	++++	8.9846e-189
cg03343013	1	43473097		Island	----	2.05039e-54	++++	5.87278e-27
cg22557725	10	60368369	BICC1		++++	2.11007e-54	----	4.98744e-29
cg09244707	7	2756996		N_Shore	----	2.51602e-54	----	5.34813e-05
cg13722700	10	46993502	GPRIN2	S_Shore	----	2.80359e-54	++++	1.66051e-06
cg11386011	6	32121156	PPT2;PPT2;PRRT1	N_Shore	----	2.9459e-54	----	1.16537e-09
cg13917964	7	30635712	GARS	S_Shore	++++	3.06886e-54	----	0.00363319			1
cg03117005	20	60642115	TAF4	S_Shore	----	3.3807e-54	++++	7.1221e-53
cg14870223	3	39093076	WDR48	N_Shore	----	4.01684e-54	----	0.0011375	1	1	1
cg06074123	4	56660460		S_Shore	----	4.21686e-54	++++	2.47437e-07		1
cg04636834	16	685580	C16orf13;C16orf13;C16orf13;C16orf13;C16orf13	Island	++++	4.29228e-54	----	1.89037e-27
cg25432232	19	57742423	AURKC;AURKC;AURKC;AURKC;AURKC	Island	----	4.37753e-54	++++	0.000841732
cg16519487	13	20876063		Island	----	4.56772e-54	++++	6.85321e-169
cg14489570	8	144099280	LY6E;LY6E;LOC100133669	N_Shore	----	5.07925e-54	----	1.38737e-19
cg17890983	13	37394336	RFXAP	S_Shore	++++	5.17106e-54	----	3.23806e-22		1
cg23954968	11	22454517		Island	----	5.29567e-54	++++	2.27205e-25
cg12913879	2	85362480	TCF7L1	Island	----	5.4629e-54	++++	2.54651e-67
cg14811319	6	88757392	SPACA1	Island	----	5.65308e-54	++++	4.25293e-15
cg13067553	1	147782452		Island	----	6.27282e-54	++++	1.74872e-19
cg10853566	14	23288993	SLC7A7;SLC7A7	N_Shelf	++++	6.29906e-54	++++	5.8695e-19
cg11111740	6	28584288		Island	----	6.32201e-54	++++	1.57362e-11			1
cg11594821	6	30458601	HLA-E	S_Shore	++++	6.41382e-54	----	2.15204e-59		1
cg17141599	2	71123688		N_Shelf	----	6.5581e-54	++++	4.148e-27
cg20011248	1	227747268		Island	----	7.15161e-54	++++	1.14406e-08			1
cg01614478	9	86571814	C9orf64	Island	----	7.81398e-54	++++	5.03006e-29
cg00594854	17	48052682		S_Shelf	----	8.12876e-54	----	7.00733e-29
cg12104698	7	139529130	TBXAS1;TBXAS1;TBXAS1;TBXAS1;TBXAS1;TBXAS1;TBXAS1;TBXAS1;TBXAS1		++++	8.27304e-54	++++	4.54804e-09
cg18303397	3	129160135	IFT122;IFT122;MBD4;IFT122;IFT122	S_Shore	++++	9.25676e-54	----	2.96754e-86
cg14947900	17	5370938	DHX33	N_Shore	++++	9.44038e-54	----	4.86283e-16
cg20518446	11	62315034	AHNAK;AHNAK	Island	----	9.95192e-54	----	1.21128e-41		1
cg05488160	6	27259162		Island	----	1.02339e-53	++++	1.95431e-93
cg03155200	11	2833259	KCNQ1;KCNQ1		----	1.03749e-53	----	6.9811e-31
cg18587465	2	152784175	CACNB4;CACNB4;CACNB4;CACNB4		++++	1.03979e-53	----	7.86644e-14
cg21075829	3	138153170	ESYT3	N_Shore	----	1.21358e-53	++++	6.80075e-22			1
cg00233307	19	39109076	MAP4K1;EIF3K;MAP4K1	N_Shore	----	1.23259e-53	----	1.00765e-38
cg17324149	3	127725522			----	1.26145e-53	++++	0.00332496		1	1
cg11902458	1	154842746	KCNN3;KCNN3		++++	1.59788e-53	++++	9.62729e-39
cg25309888	2	27988724			----	1.77856e-53	++++	3.05607e-15			1
cg13474639	9	104160145	MRPL50;ZNF189;ZNF189	N_Shore	++++	1.9248e-53	----	7.21719e-46
cg27169020	15	83954229	BNC1	S_Shore	----	2.28517e-53	++++	7.39426e-65
cg11834473	6	29591753	GABBR1;GABBR1;GABBR1	N_Shelf	++++	2.33567e-53	----	2.68259e-30
cg00378510	19	2291020	LINGO3	Island	++++	2.37108e-53	++++	5.43994e-42
cg21131022	19	19371974	HAPLN4	Island	----	2.42092e-53	++++	3.95126e-25
cg14837598	8	21916635	EPB49;EPB49;EPB49;EPB49;EPB49;EPB49	S_Shelf	----	2.58815e-53	----	2.03957e-151
cg17459387	17	79134666	AATK	S_Shore	----	2.6075e-53	----	1.27129e-60
cg26152923	19	18284120	IFI30	N_Shore	----	2.68226e-53	----	7.98121e-09
cg05557932	16	3929351	CREBBP;CREBBP	N_Shore	++++	2.96229e-53	----	4.09881e-111
cg03945800	16	4165515	ADCY9	Island	----	3.13018e-53	++++	2.77211e-38
cg13895343	17	26708773	SARM1	Island	----	3.15445e-53	++++	1.64313e-82
cg11795276	12	54454252	FLJ12825	Island	----	3.63975e-53	++++	1.17456e-11			1
cg17641252	14	67878535	PLEK2	Island	----	3.64958e-53	++++	6.0105e-34
cg06126421	6	30720080			----	3.74795e-53	----	9.90929e-59
cg04839131	7	150644715	KCNH2;KCNH2	Island	----	3.91519e-53	++++	1.46311e-42
cg12166476	13	76334866	LMO7;LMO7;LMO7		++++	4.04963e-53	----	1.23587e-55
cg06933824	5	172110579	NEURL1B	Island	----	4.53821e-53	++++	3.50858e-180
cg21582325	12	121498343			----	4.60379e-53	----	1.02372e-39
cg06559274	6	108487903	NR2E1;NR2E1	Island	----	5.81376e-53	++++	1.67953e-17
cg13951491	1	45793032	HPDL	Island	++++	5.83671e-53	++++	7.04996e-09
cg14643892	12	64784070	C12orf56;C12orf56	Island	----	7.35163e-53	++++	2.7085e-92			1
cg19389372	19	36485356	SDHAF1	Island	----	7.40082e-53	++++	1.21259e-05
cg03483626	1	111218276	KCNA3	S_Shore	----	7.96481e-53	----	2.10122e-05		1
cg07080050	12	54413345	HOXC4;HOXC5;HOXC6	Island	----	8.17139e-53	++++	4.22014e-32			1
cg18608017	10	73158072	CDH23;CDH23	S_Shore	----	8.70916e-53	----	4.97432e-19
cg09479389	19	14016729	C19orf57;CC2D1A	Island	----	8.84032e-53	++++	7.97793e-13			1
cg00306311	4	17783936	FAM184B	S_Shore	----	8.93541e-53	++++	4.38737e-05
cg17518215	2	172973241		Island	----	9.5158e-53	++++	7.24342e-05
cg15373239	10	119303225	EMX2OS;EMX2;EMX2	Island	----	9.75517e-53	++++	2.0035e-107			1
cg07388493	1	39491459	NDUFS5		----	9.75845e-53	----	2.73801e-160
cg03858673	6	28584155		Island	----	9.94536e-53	++++	2.32091e-48
cg26290219	6	33128906		N_Shore	----	1.07946e-52	----	1.79036e-108
cg10775231	10	81967666		S_Shore	----	1.1293e-52	----	3.05116e-15
cg03325667	10	43447292			----	1.16177e-52	++++	0.000379714
cg08876103	1	39572323	MACF1	S_Shore	++++	1.24899e-52	----	4.98416e-88
cg21853707	1	164676874	PBX1		----	1.26801e-52	----	0.000920101		1
cg19676181	4	56660398		S_Shore	----	1.28145e-52	++++	2.89311e-27
cg25693132	3	51740741	GRM2;GRM2	Island	++++	1.31851e-52	++++	9.77157e-113		1
cg00966763	20	60472065	CDH4	S_Shore	++++	1.3208e-52	----	1.70019e-16		1
cg18220961	11	69785905			----	1.33097e-52	++++	0.000104503
cg13215995	17	43222258		Island	----	1.35917e-52	----	3.46596e-32
cg17835016	13	113784082	F10	Island	----	1.42835e-52	++++	7.48279e-06
cg00496272	16	67877232	CENPT;THAP11	S_Shore	++++	1.55296e-52	----	0.000146803
cg26646411	22	19841374	GNB1L;C22orf29	N_Shore	++++	1.6428e-52	----	9.11904e-26
cg01497154	20	3661910	ADAM33;ADAM33	N_Shore	----	1.65035e-52	----	4.06274e-06
cg01971407	11	313624	IFITM1	N_Shelf	++++	1.66182e-52	----	5.13171e-24
cg17123690	19	55951801	SHISA7	Island	++++	1.77561e-52	++++	4.38081e-44
cg13594903	9	35102784	STOML2	Island	++++	1.98743e-52	----	7.01389e-10
cg07571951	7	75931608	HSPB1	N_Shore	----	2.05334e-52	----	1.25686e-21
cg00340102	20	34129456	ERGIC3;ERGIC3	N_Shore	----	2.23271e-52	----	2.0294e-19
cg07971863	15	69755671			----	2.27828e-52	----	1.63657e-28
cg00007076	8	67342600	RRS1;RRS1	N_Shore	++++	2.90557e-52	----	1.39556e-48
cg18310639	1	223904225	CAPN2;CAPN2	S_Shelf	++++	2.97967e-52	----	3.37742e-175
cg23350904	17	4648580	ZMYND15;ZMYND15		----	3.08067e-52	++++	2.05695e-70		1
cg23680067	7	38977976			++++	3.1151e-52	----	2.04678e-05
cg06566034	18	47825363		S_Shore	----	3.23052e-52	++++	3.22724e-14			1
cg12140144	1	2984275	FLJ42875;PRDM16;FLJ42875;PRDM16	Island	----	3.31512e-52	++++	0.000604985		1
cg03102841	11	85646010		Island	----	3.3971e-52	++++	6.72205e-09			1
cg04606861	12	132905735	GALNT9	Island	++++	3.42333e-52	++++	9.64041e-231
cg01969701	11	69286145		Island	----	3.66598e-52	++++	6.65319e-08
cg21628200	11	61355200		Island	----	3.95126e-52	++++	2.22647e-30
cg02278683	2	118770542	CCDC93	N_Shore	++++	4.23325e-52	----	8.35502e-61
cg02246609	6	28584003		Island	----	4.65625e-52	++++	4.31851e-43			1
cg11770664	10	45470023	RASSF4	Island	----	5.0399e-52	----	5.37764e-125
cg05185040	8	41425077		Island	----	5.47601e-52	++++	1.07356e-22
cg15108727	5	3104873			----	5.49241e-52	++++	8.36814e-10
cg11785154	1	202679993	SYT2	S_Shore	----	5.57111e-52	++++	7.49919e-07
cg23372544	19	23387068		Island	----	5.61373e-52	++++	7.42705e-35
cg24497732	7	42278077	GLI3	S_Shore	----	5.81376e-52	++++	4.16439e-209
cg12754260	8	24769018		N_Shore	----	5.83999e-52	++++	4.66937e-28			1
cg07886712	22	29665413	EWSR1;EWSR1;EWSR1;EWSR1;RHBDD3;EWSR1	S_Shore	++++	6.27938e-52	----	2.51962e-13
cg12315353	6	29573089	GABBR1;GABBR1;GABBR1		++++	6.38103e-52	----	2.43994e-75		1
cg20167679	7	1392573			----	6.80403e-52	----	0.00506285
cg07255664	20	23028977	THBD	Island	----	7.39426e-52	++++	2.28287e-37
cg14475875	3	193856076	HES1	S_Shore	++++	8.16811e-52	++++	8.37141e-23
cg15027262	5	122180440	SNX24	N_Shore	----	8.46323e-52	++++	0.00291835
cg10361095	3	42727425	KBTBD5	Island	----	8.76162e-52	++++	2.95574e-11
cg21340170	6	5084517	PPP1R3G	Island	----	8.97476e-52	++++	4.94809e-16
cg02732252	16	3068014	CLDN6	Island	----	9.01411e-52	++++	3.29872e-80
cg26326633	8	41655078	ANK1;ANK1;ANK1;ANK1;ANK1;ANK1;ANK1;ANK1;ANK1	Island	----	9.38792e-52	++++	5.9318e-12
cg05542681	16	744328	FBXL16	Island	----	9.6568e-52	++++	4.1316e-93
cg08791234	6	33267781	TAPBP;TAPBP;RGL2;RGL2	S_Shore	----	1.20702e-51	++++	3.76435e-10
cg00138126	20	56286697	PMEPA1;PMEPA1;PMEPA1	S_Shore	----	1.22177e-51	----	2.88819e-16
cg19243826	19	14584926	PTGER1	Island	----	1.25817e-51	++++	2.38321e-46
cg25150721	1	100826388	CDC14A;CDC14A;CDC14A		----	1.38278e-51	----	2.84982e-50		1
cg23268208	22	30476345	HORMAD2	Island	----	1.45557e-51	++++	2.34616e-64
cg26316599	5	172456055	ATP6V0E1		----	1.45983e-51	----	3.37742e-129		1
cg01381109	2	96054917		Island	----	1.66412e-51	----	8.44683e-34
cg11561301	4	5526510	C4orf6		++++	1.76774e-51	----	1.34835e-10
cg19741660	14	100631897			----	1.76806e-51	----	1.5828e-08
cg25594486	19	51165441	SHANK1	Island	----	1.80774e-51	++++	3.70533e-07		1	1
cg06244497	19	39466575	FBXO17	S_Shore	----	2.15401e-51	++++	2.33698e-24
cg10978034	6	33129988		S_Shore	----	2.27828e-51	----	8.23042e-98
cg16547529	11	75140681	KLHL35	N_Shore	----	2.46945e-51	++++	4.17095e-59
cg00509772	20	32273129	E2F1	N_Shore	++++	2.61373e-51	----	6.01378e-43
cg14204433	1	7844775	PER3;PER3	Island	----	2.85441e-51	++++	1.21751e-44
cg22935653	5	74532268	ANKRD31	N_Shore	----	2.85868e-51	----	2.8413e-38
cg20701556	1	95698924	RWDD3;RWDD3	N_Shore	----	3.04984e-51	----	7.98121e-08
cg10665321	19	19221392	SLC25A42	Island	----	3.13608e-51	++++	5.27927e-114
cg25895948	15	85360655	ALPK3	S_Shore	----	3.34463e-51	++++	4.1316e-155
cg13886554	2	112895695	FBLN7;FBLN7	N_Shore	----	3.35119e-51	++++	1.47787e-09
cg26283879	8	142255356			----	3.3971e-51	----	6.54498e-31
cg11196437	1	75593865	LHX8	N_Shore	----	3.50203e-51	++++	6.17773e-27
cg10271192	2	63279645	OTX1	N_Shore	----	3.51514e-51	++++	5.5252e-77
cg06866232	11	5020582	OR51L1		++++	3.51514e-51	----	2.45502e-09		1
cg06975048	17	7826155	KCNAB3	Island	----	3.68893e-51	++++	6.32529e-82
cg17478749	6	31589365	SNORA38;BAT2	S_Shore	++++	3.69221e-51	----	0.000132933		1
cg04834502	16	48644360	N4BP1	S_Shore	----	4.44311e-51	----	1.591e-79
cg20102280	13	47470793	HTR2A;HTR2A		++++	4.47918e-51	----	2.77408e-207
cg01020987	1	3816166	C1orf174;LOC100133612	N_Shore	----	4.77758e-51	----	1.76052e-34
cg19399220	19	10527588		Island	++++	5.19402e-51	++++	6.24331e-39			1
cg02854229	14	101962994			----	5.35797e-51	++++	2.76162e-07
cg23713520	16	57318087	PLLP	Island	----	5.42683e-51	++++	1.52312e-24
cg15794873	10	127059374			----	5.54815e-51	++++	7.60412e-54
cg16419629	3	173115536	NLGN1	Island	----	5.8531e-51	++++	2.89868e-69			1
cg11410682	19	46999224	PNMAL2	Island	----	6.20068e-51	++++	1.31228e-32
cg17593342	6	14037614			++++	6.886e-51	----	1.20013e-174
cg22682172	1	2365064			++++	7.57133e-51	----	1.76774e-28
cg26207503	12	81110749	MYF5;MYF5	Island	----	8.0763e-51	++++	6.78763e-33			1
cg17326451	7	86975534	CROT;TP53TG1;CROT;CROT	S_Shore	++++	8.4206e-51	----	5.57438e-112		1
cg18515624	18	30049316	FAM59A	N_Shore	----	9.42399e-51	----	2.51274e-55
cg09328024	1	206808174	DYRK3;DYRK3	N_Shore	----	9.91913e-51	++++	3.68565e-31
cg07920525	2	27988858			----	1.02405e-50	++++	9.30922e-34
cg03146625	12	54448729	HOXC4;HOXC4	S_Shore	----	1.17062e-50	++++	0.00116439			1
cg16141056	7	129143037		Island	----	1.23063e-50	++++	0.00139425
cg06858186	12	54144921		Island	----	1.25817e-50	++++	1.74118e-99
cg26077811	11	119232263	USP2;USP2	N_Shelf	++++	1.29063e-50	----	3.0364e-28
cg03914284	17	4686232	TM4SF5	Island	----	1.51099e-50	++++	0.00656138
cg10440578	1	115397857	SYCP1	Island	----	1.52509e-50	++++	5.23336e-16			1
cg18002116	13	53419596	PCDH8;PCDH8	N_Shore	----	1.53427e-50	++++	1.30637e-14
cg13550419	17	44898510		S_Shore	----	1.66477e-50	----	6.6204e-15
cg24579589	1	235256910			----	1.66609e-50	----	7.93202e-07
cg24808901	1	95698954	RWDD3;RWDD3	N_Shore	----	1.69265e-50	----	5.57439e-05
cg09169617	15	89921672	LOC254559	Island	----	1.72445e-50	++++	6.75484e-99
cg21593015	4	184893118	STOX2		++++	1.7379e-50	----	1.0952e-88
cg09368716	1	1361655	TMEM88B	Island	----	1.83135e-50	----	0.000193103
cg01296199	3	123752573		Island	----	1.90021e-50	++++	0.000300394
cg10419511	20	31170984		Island	----	1.91005e-50	++++	4.09225e-05
cg06247837	17	37820135	TCAP;STARD3;STARD3;STARD3	N_Shelf	----	1.91497e-50	----	1.06897e-209
cg19492423	19	18700933	C19orf60;C19orf60	S_Shore	++++	2.07728e-50	++++	7.62051e-05
cg14640670	5	139494937	PURA;PURA	S_Shore	++++	2.31337e-50	----	2.40813e-41
cg11744524	6	4078970	C6orf146;C6orf201	N_Shore	----	2.56258e-50	++++	2.50355e-18		1	1
cg16091995	2	202484320	ALS2CR11;ALS2CR11;ALS2CR11;ALS2CR11	S_Shore	----	2.63341e-50	----	0.00036463
cg10806820	3	48699090	CELSR3	Island	++++	2.77604e-50	++++	1.32146e-284
cg00424451	17	76338660		S_Shore	----	2.90885e-50	----	6.31545e-05
cg22901840	1	68512777	DIRAS3	Island	----	3.00656e-50	++++	7.2467e-86
cg05595301	8	145028230	PLEC1;PLEC1;PLEC1	Island	----	3.05739e-50	----	2.30845e-88
cg08957484	5	132083532	CCNI2	Island	----	3.14166e-50	++++	3.06591e-173
cg13428561	17	42734659	C17orf104	S_Shore	----	3.44628e-50	++++	2.89147e-16			1
cg09523691	5	115178810	ATG12;AP3S1	S_Shore	++++	3.67254e-50	----	3.91846e-36
cg20386580	10	105344807	NEURL	Island	----	3.69549e-50	++++	4.03323e-98
cg05720226	7	116786597	ST7;ST7;ST7OT2		----	3.76435e-50	----	1.75396e-14
cg24438909	1	156828693	NTRK1;INSRR	N_Shore	----	3.96437e-50	----	1.87758e-34
cg03173367	2	97524995	ANKRD39	S_Shore	----	4.16111e-50	----	5.9318e-22
cg10300255	14	73706367	PAPLN	Island	----	4.43328e-50	++++	6.87945e-21
cg10556064	16	68481489	SMPD3	Island	++++	4.52837e-50	++++	3.90535e-27
cg13030331	2	241497599	ANKMY1;ANKMY1	Island	++++	4.68248e-50	++++	1.81233e-60
cg06856687	20	44934509		N_Shore	----	4.89562e-50	----	6.99749e-11		1
cg02809409	10	72218642		S_Shore	----	5.47601e-50	++++	2.92426e-13
cg00014104	22	22220367	MAPK1;MAPK1	N_Shore	++++	5.95148e-50	----	8.80425e-20		1
cg17450733	12	45443875	DBX2	N_Shore	----	6.05313e-50	++++	8.2796e-15
cg09608765	3	45636137	LIMD1	S_Shore	++++	6.07936e-50	----	5.24648e-105
cg09323835	13	24041251		S_Shore	----	6.20396e-50	----	5.40387e-74
cg16682903	2	158694670	ACVR1;ACVR1		++++	6.37775e-50	----	9.21413e-162
cg06246094	15	42174085	SPTBN5	Island	----	6.44005e-50	++++	2.58947e-11
cg10616300	11	66138557	SLC29A2	N_Shore	++++	6.9188e-50	++++	6.21052e-18
cg27086690	15	57026064	ZNF280D;ZNF280D;ZNF280D	Island	----	6.95159e-50	++++	3.39054e-13			1
cg07634645	12	14720938	PLBD1	Island	----	7.21719e-50	++++	4.31195e-05
cg03771939	10	96161916	TBC1D12	N_Shore	----	8.30911e-50	++++	1.92677e-14			1
cg12490835	10	22623821		Island	----	8.99443e-50	++++	3.21806e-55
cg12582654	7	128550812	KCP;KCP	Island	----	9.63385e-50	++++	0.000262226
cg23650244	1	5812892			++++	1.09487e-49	----	2.54487e-35
cg03688058	7	89840708	STEAP2;STEAP2	N_Shore	----	1.16669e-49	++++	1.76446e-07		1
cg13335886	1	3808127	C1orf174	N_Shore	----	1.29686e-49	----	5.5252e-32
cg15988232	3	47621127	CSPG5	Island	----	1.41065e-49	++++	2.94295e-41
cg20429833	17	6358427	PITPNM3;PITPNM3	Island	----	1.52837e-49	++++	4.47918e-18
cg24718465	19	46999118	PNMAL2;PNMAL2	Island	----	1.53e-49	++++	1.20964e-46
cg19618897	17	65242892		S_Shore	----	1.56345e-49	----	2.98361e-22
cg08352439	7	55637123	VOPP1	N_Shelf	----	1.57657e-49	----	1.60444e-62
cg15299997	2	234620463	UGT1A5;UGT1A6;UGT1A10;UGT1A9;UGT1A6;UGT1A7;UGT1A8		++++	1.57952e-49	----	1.44475e-68
cg04142864	11	118480576	PHLDB1;PHLDB1;PHLDB1	Island	----	1.62215e-49	++++	5.38092e-11
cg15408080	12	90057674			++++	1.80971e-49	----	8.17139e-11
cg09265392	16	49910216		Island	----	2.02776e-49	++++	3.33479e-08
cg06832677	2	119976764			++++	2.12614e-49	----	9.76501e-29
cg09374353	11	64620859	EHD1	N_Shore	++++	2.13269e-49	++++	2.85966e-17
cg23998749	1	154968781		N_Shelf	----	2.34485e-49	----	2.97246e-11
cg18219562	17	41773643			----	2.82425e-49	----	1.49295e-10
cg20222519	3	23245916	UBE2E2	S_Shore	++++	2.87901e-49	++++	3.0141e-06
cg15998609	1	216774956	ESRRG;ESRRG;ESRRG;ESRRG;ESRRG	S_Shore	++++	3.10821e-49	----	2.90786e-18
cg03239970	16	75088935	ZNRF1		----	3.25479e-49	----	9.41087e-05
cg07173688	2	119564329			----	3.31184e-49	++++	3.19019e-22
cg04460372	9	130661175	ST6GALNAC6	Island	----	3.584e-49	----	3.38398e-17
cg15982419	18	9474707	RALBP1	N_Shore	----	3.62991e-49	++++	1.9212e-48	1
cg12432980	20	5987794	CRLS1;CRLS1	S_Shore	++++	4.36114e-49	----	2.17663e-44
cg05333146	16	67183725	B3GNT9	Island	----	5.13499e-49	++++	3.04558e-28
cg10791696	10	43818911		S_Shore	----	5.24976e-49	++++	0.00465297		1	1
cg18222590	1	204290972	PLEKHA6		----	5.3055e-49	----	5.21041e-40
cg08111158	1	227746191		Island	----	5.45634e-49	++++	7.72872e-13			1
cg16535018	17	36829606	C17orf96;C17orf96	N_Shore	----	5.88262e-49	++++	5.7285e-18
cg20010135	16	30996822	HSD3B7;HSD3B7;HSD3B7		++++	5.88589e-49	----	2.50847e-120
cg18501647	6	32117379	PRRT1	N_Shore	----	6.65647e-49	++++	7.57461e-169
cg20912205	3	50337305	NAT6;HYAL3	S_Shore	----	7.07947e-49	----	1.26866e-63
cg23383189	5	176560116	NSD1;NSD1;NSD1	Island	----	7.24014e-49	++++	9.06657e-52
cg03850451	4	183728026		Island	----	7.2467e-49	++++	1.18144e-08
cg21186955	7	100729412	TRIM56	N_Shelf	++++	8.55832e-49	----	1.28867e-228
cg00995520	1	111218282	KCNA3	S_Shore	----	9.08297e-49	----	2.91835e-21		1	1
cg12464638	11	844400	TSPAN4;TSPAN4;TSPAN4;TSPAN4;TSPAN4;TSPAN4;TSPAN4	S_Shore	----	9.16167e-49	----	7.45656e-10		1
cg08304608	20	57594200	TUBB1		----	9.22069e-49	----	3.85944e-12
cg16045390	17	37896620	GRB7;GRB7		----	9.29283e-49	----	0.00148246		1
cg02852238	15	42174934	SPTBN5	S_Shore	----	9.81748e-49	----	5.16122e-37		1
cg24733126	11	9112214	SCUBE2;SCUBE2	N_Shore	----	9.84371e-49	++++	2.054e-05		1
cg22299097	3	97690590	MINA;MINA;MINA	N_Shore	++++	9.94536e-49	----	4.55788e-101
cg06617961	16	33965255	MIR1826	Island	----	1.21522e-48	++++	1.88808e-25
cg19327213	19	47988783	KPTN	S_Shore	++++	1.23751e-48	++++	2.96229e-30		1
cg02735762	9	135280262	TTF1	N_Shore	++++	1.2926e-48	++++	3.70205e-10
cg10837625	15	45428812	DUOX1;DUOX1	S_Shore	----	1.3408e-48	++++	3.73812e-30
cg10151367	11	2847642	KCNQ1;KCNQ1		++++	1.37687e-48	++++	6.06624e-258
cg21715189	2	38304802	CYP1B1	S_Shore	----	1.3995e-48	++++	7.67298e-44			1
cg03655395	1	56943111		N_Shore	----	1.40606e-48	----	1.47164e-30
cg22328256	6	28757381		S_Shelf	++++	1.41261e-48	++++	1.18898e-19
cg09269945	20	55837692	BMP7	N_Shore	----	1.46508e-48	++++	0.00634168			1
cg13431800	12	42519303	GXYLT1;GXYLT1		++++	1.59723e-48	++++	1.71724e-20
cg15175581	15	33360262	FMN1		++++	1.79266e-48	----	2.75866e-19
cg09284026	14	70040899		N_Shore	----	1.92939e-48	++++	1.51689e-08
cg20714328	5	79331850	THBS4	S_Shore	----	1.97825e-48	++++	5.3842e-05			1
cg06847624	5	176827671	PFN3	Island	----	1.9976e-48	++++	2.54749e-08
cg05747695	11	3156892	OSBPL5;OSBPL5;OSBPL5		++++	2.34813e-48	++++	2.31304e-13
cg05306472	16	73517129			----	2.38518e-48	++++	1.03093e-08			1
cg01075005	6	42879409		Island	----	2.46617e-48	++++	3.65614e-11
cg00384701	3	13974800		Island	----	2.51602e-48	++++	2.75145e-11	1		1
cg22647546	2	26394518	FAM59B	N_Shore	----	3.08198e-48	++++	7.20407e-28
cg00456672	15	62358751	C2CD4A	N_Shore	----	3.20363e-48	----	2.16483e-37			1
cg25880537	1	2365337			++++	3.49219e-48	----	6.38103e-23		1	1
cg14579118	7	43797547	BLVRA	N_Shore	----	3.50858e-48	----	3.2597e-35
cg05923226	19	15121516	CCDC105	N_Shore	----	3.8496e-48	++++	4.52509e-245
cg16419441	8	105478683	DPYS	Island	----	3.89551e-48	++++	3.43317e-35
cg05413199	16	67430454	ZDHHC1	S_Shore	----	4.03651e-48	----	0.00152279
cg12121318	4	2964239	GRK4;GRK4;GRK4;NOP14	N_Shore	++++	4.09225e-48	----	2.94787e-10		1
cg02404974	6	41376295		N_Shore	----	4.29883e-48	----	1.14963e-09		1
cg13266435	18	14748220	ANKRD30B	Island	----	4.45623e-48	++++	3.91519e-08
cg22281380	7	50861467	GRB10	Island	----	4.52181e-48	++++	1.85889e-82
cg07763376	5	178016195	COL23A1	N_Shore	----	4.56772e-48	++++	5.55143e-10
cg04380653	11	2293164	ASCL2	S_Shore	----	4.88251e-48	++++	7.46968e-08
cg11700584	14	50088544	RPL36AL;MGAT2	S_Shore	++++	4.94481e-48	----	1.27981e-10		1
cg14789818	1	227748712		Island	----	5.33501e-48	++++	6.886e-86
cg01589998	12	109729478	FOXN4	N_Shore	----	5.54159e-48	++++	0.00141393		1	1
cg14750066	12	41582063	PDZRN4	N_Shore	----	5.59406e-48	++++	2.55963e-47
cg18709349	19	46999274	PNMAL2	Island	----	6.07608e-48	++++	1.66149e-32
cg12664649	6	53882326	C6orf142		++++	6.1515e-48	----	9.1092e-12
cg24489344	22	46457998		Island	----	6.27938e-48	----	3.13182e-27		1	1
cg00316875	18	12912338		Island	----	6.31873e-48	++++	3.56761e-15
cg25835226	10	88149632		Island	----	6.88601e-48	++++	5.81703e-75
cg15477144	22	45705034	FAM118A;FAM118A	N_Shore	----	6.89256e-48	++++	3.91519e-10
cg22698904	3	35680387		N_Shore	----	7.31556e-48	++++	5.7908e-05
cg22533683	17	29887049	MIR193A	Island	----	7.67298e-48	++++	5.51208e-11
cg08512167	19	45901567	PPP1R13L;PPP1R13L	Island	----	7.78446e-48	++++	2.33796e-100
cg14292572	12	67665055	CAND1	S_Shore	++++	8.15828e-48	----	5.29239e-17
cg06036471	10	93861385	CPEB3		++++	8.97148e-48	++++	3.56105e-06		1
cg02691035	16	89163800	ACSF3;ACSF3;ACSF3	N_Shelf	++++	9.14855e-48	++++	1.03848e-30		1
cg01154966	20	33680989	TRPC4AP;TRPC4AP	Island	----	9.36169e-48	----	3.26528e-18
cg19761273	17	80232096	CSNK1D;CSNK1D	S_Shore	----	1.0952e-47	----	1.79036e-239
cg16359799	3	138739900	PRR23B	Island	----	1.20276e-47	++++	1.12242e-13
cg08057338	18	24128862	KCTD1;KCTD1;KCTD1;KCTD1	Island	----	1.23883e-47	++++	2.58553e-11
cg07437373	3	134125814		Island	----	1.28736e-47	++++	1.15095e-105
cg05245650	2	37900205	CDC42EP3	S_Shore	----	1.3231e-47	----	1.34671e-50
cg21488876	19	5250376	PTPRS;PTPRS;PTPRS;PTPRS	N_Shore	----	1.40311e-47	----	6.02034e-06
cg02871313	6	88757302	SPACA1	Island	----	1.49295e-47	++++	0.00393814
cg05143633	12	132905611	GALNT9	Island	++++	1.51328e-47	++++	1.22669e-21			1
cg23824183	8	124285055	ZHX1;ZHX1	N_Shore	++++	1.55493e-47	----	4.86939e-15
cg03954393	1	204679626			----	1.72183e-47	----	8.30583e-10
cg08928145	19	19625364	TSSK6;TSSK6	Island	----	1.78282e-47	++++	2.89868e-114
cg07282816	17	26711393	SARM1	Island	----	1.85693e-47	++++	9.64041e-11
cg05446860	20	25129126	LOC284798;LOC284798;LOC284798	Island	----	2.07269e-47	++++	0.0004289
cg20319926	16	685686	C16orf13;C16orf13;C16orf13;C16orf13;C16orf13	Island	++++	2.21828e-47	----	7.03028e-23
cg20770435	18	35105154	BRUNOL4;BRUNOL4;BRUNOL4;BRUNOL4	S_Shore	----	2.23795e-47	++++	4.94809e-06
cg19302996	17	73780495	UNK	N_Shore	----	2.27271e-47	----	4.40704e-68
cg14398661	9	129433779	LMX1B	Island	----	2.31435e-47	++++	0.0014559			1
cg15007228	1	2210335	SKI	N_Shore	----	2.63341e-47	----	1.01978e-93
cg18121862	14	101195312	DLK1	S_Shore	----	2.78129e-47	----	1.03388e-08
cg13825574	9	140117257	RNF208	Island	----	3.01968e-47	++++	1.37261e-77
cg13911707	1	247496404	ZNF496	S_Shore	++++	3.13346e-47	----	3.99716e-27
cg07972954	6	30690392	TUBB	S_Shore	++++	3.24757e-47	----	5.0399e-19
cg25614726	1	10490058	APITD1;APITD1;APITD1	N_Shore	----	3.41349e-47	----	4.21358e-29
cg19864758	20	17206720	PCSK2	Island	----	3.48563e-47	++++	5.24648e-160			1
cg02375503	15	69591110	PAQR5	N_Shore	----	3.59384e-47	----	8.57799e-07
cg02744588	19	48823880	CCDC114	N_Shore	----	3.61351e-47	----	3.161e-45
cg19642433	12	64783703	C12orf56;C12orf56	N_Shore	----	3.66598e-47	++++	2.47535e-08
cg03193328	7	65746852	TPST1		++++	4.11193e-47	----	8.67965e-26
cg24750752	19	35819889	CD22		++++	4.19718e-47	++++	9.89617e-74
cg15011409	19	10405226	ICAM5	Island	----	4.94481e-47	++++	6.9647e-49			1
cg09721427	10	94448702	HHEX	Island	++++	5.01039e-47	++++	7.63691e-11
cg11709544	1	26233404	STMN1;STMN1;STMN1;STMN1	Island	----	5.13171e-47	++++	0.000667942
cg04322572	10	43447618			----	5.31206e-47	----	1.88185e-05			1
cg08783616	17	16389293	C17orf76;C17orf76		++++	5.56783e-47	----	5.28255e-51		1
cg16519668	16	75279566	BCAR1;BCAR1;BCAR1;BCAR1;BCAR1;BCAR1;BCAR1;BCAR1		----	5.58422e-47	----	0.00275637		1
cg00554413	1	59042113	TACSTD2	Island	----	5.70883e-47	++++	1.7215e-181
cg27211408	7	2060130	MAD1L1;MAD1L1;MAD1L1	Island	----	6.01378e-47	----	7.34179e-40
cg18935108	11	113660932		Island	----	6.15806e-47	++++	3.46268e-11
cg10394788	9	124360547	DAB2IP	Island	----	6.33185e-47	++++	2.46814e-46
cg18611122	1	150947896	LASS2;LASS2	Island	----	6.45317e-47	----	3.41677e-09
cg04240553	16	67188614	TRADD	Island	----	6.54826e-47	++++	8.81409e-06
cg02121547	11	113649020	CLDN25		++++	6.97454e-47	----	1.28703e-15
cg16415457	3	23713441			----	7.29589e-47	++++	5.96787e-09
cg17342973	3	184301239		Island	----	7.3877e-47	++++	4.12177e-41
cg18345924	21	22372231	NCAM2	S_Shore	++++	7.72216e-47	----	3.90207e-95
cg25120326	3	13591084	FBLN2;FBLN2	S_Shore	----	7.96481e-47	++++	6.10887e-32
cg11434671	17	74524611	CYGB		----	8.63702e-47	----	0.0012103
cg11203616	7	47576580	TNS3	Island	++++	8.82392e-47	++++	2.79736e-32
cg23956260	10	23632740	C10orf67		----	9.25348e-47	++++	1.92513e-68
cg07170045	8	21905960	FGF17	S_Shore	----	1.02044e-46	++++	1.75167e-35
cg10639933	3	39426101	SLC25A38	S_Shore	++++	1.08635e-46	----	2.39699e-13		1
cg21313071	20	49640589	KCNG1	S_Shore	----	1.12504e-46	++++	7.0434e-05
cg24020215	14	79748641	NRXN3;NRXN3;NRXN3	S_Shelf	++++	1.16242e-46	++++	5.94492e-61
cg19624849	1	145415412	HFE2;HFE2;HFE2;HFE2	Island	----	1.17259e-46	++++	8.21402e-26
cg03253268	21	44592883	CRYAA	Island	----	1.18079e-46	++++	4.44639e-08
cg00238353	10	129785537	PTPRE		----	1.20571e-46	----	1.86447e-09
cg15659713	8	38586183	TACC1;TACC1		----	1.21358e-46	++++	2.01268e-31
cg09347959	15	33360271	FMN1		++++	1.31785e-46	----	1.11422e-10
cg05533340	11	20496110	PRMT3;PRMT3;PRMT3		----	1.43032e-46	----	4.11193e-11
cg11139090	5	176294068	UNC5A	N_Shelf	----	1.44672e-46	++++	1.16701e-20
cg05432213	15	35086985	ACTC1		----	1.48967e-46	++++	1.60805e-15		1	1
cg08160085	12	2045730			----	1.50836e-46	----	2.50847e-30
cg06391982	3	13936753		Island	----	1.60346e-46	++++	3.21347e-97
cg14222245	19	58861502	A1BG	Island	----	1.73298e-46	++++	9.48629e-08			1
cg13350768	19	41074427	SPTBN4	S_Shore	----	1.99694e-46	++++	4.04635e-20
cg05998426	11	66103925	RIN1;RIN1	S_Shore	----	2.01399e-46	++++	4.99727e-16
cg08881175	10	130832393			++++	2.34321e-46	++++	2.25304e-44
cg03497652	16	4751569	ANKS3		++++	2.43863e-46	++++	0.00300459
cg03562770	12	39538604		Island	----	2.50028e-46	++++	9.60434e-15			1
cg13040392	9	136075393		Island	++++	2.66488e-46	++++	5.98427e-06			1
cg27492942	17	36885965	CISD3;MLLT6	N_Shore	----	2.69144e-46	----	9.80436e-102
cg03043157	6	97010903	FHL5;FHL5		++++	2.75866e-46	----	7.83693e-133
cg22809047	2	101618261	RPL31;RPL31;RPL31	Island	----	2.85704e-46	++++	3.10854e-192
cg17241776	13	51417469	DLEU7	Island	----	2.9154e-46	++++	6.6991e-74
cg25079544	17	71308681	CDC42EP4	Island	----	3.03214e-46	++++	5.2596e-43
cg00891541	16	68481487	SMPD3	Island	++++	3.12821e-46	++++	2.76424e-44
cg27307298	1	6266753	RNF207	Island	----	3.13313e-46	++++	1.42999e-46
cg24353535	11	2293048	ASCL2	S_Shore	----	3.18789e-46	++++	7.53854e-19
cg18747408	10	130841097			++++	3.20068e-46	++++	8.88623e-128
cg14183865	4	781229	CPLX1	S_Shore	----	3.27708e-46	----	4.74806e-48			1
cg09224821	17	80329944		Island	++++	3.29872e-46	++++	4.35458e-06
cg05756489	10	92616870	HTR7;HTR7;HTR7	Island	----	3.37086e-46	++++	1.69101e-54
cg06108383	6	32120899	PPT2;PRRT1;PPT2	N_Shore	----	3.47251e-46	----	2.12974e-24
cg23476877	5	176543964		Island	----	3.74795e-46	++++	5.47601e-118
cg07592361	2	241496830	ANKMY1;ANKMY1	Island	++++	3.76107e-46	++++	1.43819e-16
cg02807859	13	28350407			----	3.79714e-46	++++	3.04427e-42
cg14371731	10	81003175	ZMIZ1	Island	++++	3.90535e-46	++++	2.91671e-36
cg22897615	6	32117079	PRRT1	Island	----	4.02339e-46	++++	5.11532e-130
cg15890469	14	75408846	PGF		----	4.10537e-46	----	1.3208e-11
cg15254238	10	70321874	TET1	S_Shore	----	4.11193e-46	++++	2.94295e-40
cg02110858	8	145028222	PLEC1;PLEC1;PLEC1	Island	----	4.20374e-46	----	1.28539e-140
cg03112665	16	89268953		S_Shore	++++	4.24309e-46	++++	3.66598e-15
cg25821245	3	46608056	LRRC2;LRRC2	S_Shore	----	4.53821e-46	----	9.36169e-36			1
cg26458072	10	102279694	SEC31B	Island	++++	4.54148e-46	++++	1.76151e-56
cg00813720	5	153989231		N_Shore	----	4.57427e-46	----	3.98405e-13		1
cg01195803	6	31777609	HSPA1L	S_Shelf	++++	4.62346e-46	----	1.67625e-21
cg06837765	11	66326652	ACTN3	Island	----	4.75462e-46	++++	7.13521e-15
cg26837192	2	48813184	STON1;STON1-GTF2A1L		++++	5.35141e-46	----	5.99738e-34
cg19254163	11	60623782	GPR44	S_Shelf	----	5.50225e-46	----	6.18429e-72	1
cg27454064	12	64215611		Island	----	5.53504e-46	++++	2.57668e-07
cg01150799	4	108955838	HADH		++++	5.59078e-46	++++	1.40704e-23		1
cg18184218	10	24755438	KIAA1217;KIAA1217;KIAA1217		++++	5.88589e-46	----	0.000132047		1
cg25764534	8	22485721	BIN3		++++	6.14822e-46	----	4.23325e-08		1
cg22928082	20	3218522	SLC4A11	N_Shore	----	6.68926e-46	++++	4.78413e-20
cg24132694	19	7984945	SNAPC2;SNAPC2	N_Shore	----	6.84994e-46	++++	2.26287e-06
cg13228642	1	181057360	IER5	N_Shore	----	7.97465e-46	++++	1.45557e-58
cg18559348	19	50936054	MYBPC2	S_Shore	----	8.75834e-46	++++	1.31293e-28		1
cg16145216	1	42385662	HIVEP3;HIVEP3	S_Shore	++++	9.07313e-46	++++	1.50672e-13
cg13035268	7	103085736	SLC26A5;SLC26A5;SLC26A5;SLC26A5;SLC26A5	Island	----	9.45678e-46	++++	1.56903e-43
cg16254374	15	83954150	BNC1	S_Shore	----	9.46662e-46	++++	3.98732e-35
cg09262197	1	3807312	C1orf174	N_Shore	----	9.50269e-46	----	7.84021e-40
cg02458483	1	33206805	KIAA1522	N_Shore	----	9.64041e-46	----	6.91224e-16
cg09832244	12	6729600	LPAR5;LPAR5	Island	----	9.76501e-46	++++	2.83048e-47
cg03883502	6	5086610	PPP1R3G	Island	----	1.05684e-45	++++	2.83638e-127
cg12811284	1	158688804	OR6K3		++++	1.09356e-45	----	5.89245e-10
cg19695041	8	38615330	TACC1	S_Shore	----	1.18439e-45	----	1.0916e-36
cg01364769	10	22607608	COMMD3	S_Shore	++++	1.18669e-45	----	6.65319e-50
cg23372684	5	178004685	COL23A1	S_Shore	----	1.27588e-45	++++	3.74795e-11
cg17465304	9	116861442	KIF12	Island	----	1.30309e-45	++++	2.6557e-09
cg01520571	17	35296481	LHX1	Island	++++	1.36769e-45	++++	7.97793e-41		1
cg13520520	19	11616957	ECSIT;ECSIT;ECSIT;ECSIT;ZNF653	S_Shore	----	1.42311e-45	++++	0.0036463
cg23973524	19	18873222	CRTC1;CRTC1	Island	++++	1.49787e-45	----	1.24932e-25
cg12303084	20	45985741	ZMYND8;ZMYND8;ZMYND8		++++	1.49787e-45	----	2.74653e-15
cg24627299	7	116311496	MET;MET	N_Shore	++++	1.51459e-45	----	1.48213e-134
cg04337007	17	72931842	OTOP3	Island	----	1.54673e-45	++++	0.00958794
cg27262717	20	44452633	TNNC2	Island	----	1.61559e-45	++++	5.01695e-96
cg03194226	3	45066832	CLEC3B		----	1.68543e-45	----	5.83671e-141
cg20804756	6	31507857	BAT1;BAT1	N_Shore	++++	2.06482e-45	----	5.91541e-12		1
cg21120249	9	139921971	C9orf139;C9orf139;ABCA2;ABCA2	N_Shore	++++	2.28714e-45	----	2.23303e-163
cg04755857	4	5748162	EVC		++++	2.32616e-45	----	2.41732e-14		1
cg16639915	15	64960011	ZNF609		----	2.33239e-45	----	8.50586e-16		1
cg14854355	17	26708366	SARM1	Island	----	2.36616e-45	++++	1.6428e-111
cg05318142	2	85999498	ATOH8		----	2.42814e-45	----	1.74872e-18			1
cg21542793	2	96781891	ADRA2B	Island	----	2.42912e-45	++++	2.0799e-16
cg19510626	1	113934971	MAGI3;MAGI3	S_Shore	++++	2.51208e-45	----	2.14778e-205
cg26173906	19	14376389		N_Shore	----	2.55274e-45	----	7.34507e-09
cg00730561	10	102279703	SEC31B	Island	++++	2.8131e-45	++++	5.22025e-44
cg14377594	9	1051505	DMRT2;DMRT2;DMRT2	N_Shore	----	2.88655e-45	++++	6.85649e-69
cg07676709	17	46673442	LOC404266;LOC404266;LOC404266;LOC404266;HOXB6;LOC404266	N_Shore	++++	3.27905e-45	----	5.63341e-18		1
cg09255514	16	16181832	ABCC1;ABCC1;ABCC1;ABCC1;ABCC1		----	3.33807e-45	++++	5.84655e-07		1
cg10678266	7	24614348	MPP6		++++	3.60695e-45	----	2.66259e-81
cg04309234	6	106441468		N_Shore	----	3.63647e-45	++++	5.75145e-10
cg24263062	20	2730191	EBF4	Island	----	3.64958e-45	++++	5.69243e-27
cg22012583	1	150947949	LASS2;LASS2	Island	----	3.76763e-45	----	1.95497e-05
cg14324502	9	88898587	ISCA1	S_Shore	----	3.80042e-45	----	8.48946e-18
cg19653594	19	40972323	SPTBN4;BLVRB	Island	++++	4.10209e-45	----	4.99727e-32
cg21994045	19	10403936	ICAM5	Island	----	4.50869e-45	++++	3.34791e-26
cg14545963	8	21868607		S_Shore	----	4.64641e-45	++++	0.00589573
cg00169725	5	176543901		Island	----	4.76774e-45	++++	1.68543e-94
cg01593834	5	145718401	POU4F3	Island	----	4.93497e-45	++++	1.05192e-29
cg25769450	22	23864945		S_Shore	----	5.07597e-45	++++	4.00044e-11
cg25402480	12	53719777		Island	----	5.1809e-45	++++	1.22276e-20
cg00286125	19	36246906	HSPB6	Island	----	5.39076e-45	++++	6.85321e-146
cg18468844	1	28503720	PTAFR;PTAFR;PTAFR;PTAFR		----	5.48913e-45	----	3.35119e-55
cg21758773	6	30458730	HLA-E	S_Shore	++++	5.50552e-45	----	1.27555e-96		1
cg01670306	8	38508658		Island	----	6.07608e-45	++++	2.85474e-27			1
cg06679087	10	99473206	MARVELD1;MARVELD1	Island	----	6.24331e-45	++++	7.04996e-41
cg02082887	17	37820361	TCAP;STARD3;STARD3;STARD3	N_Shelf	----	6.73517e-45	----	1.25424e-74
cg27117749	4	17782643	FAM184B	Island	----	7.168e-45	++++	7.99432e-05
cg07955064	16	17606673			++++	7.4664e-45	----	1.55132e-69
cg02042310	1	46940420		Island	----	7.50575e-45	++++	3.83649e-89
cg23756768	7	1450736		N_Shore	----	7.68281e-45	----	5.31862e-12
cg24709531	1	38258709	MANEAL;MANEAL	N_Shore	----	7.76151e-45	++++	3.83321e-07
cg00740914	2	66652111		N_Shore	++++	9.05346e-45	----	4.19718e-211
cg14398464	22	38082108	NOL12	N_Shore	----	9.22069e-45	----	7.80414e-123
cg19653417	12	132654924		S_Shore	----	9.27643e-45	----	1.26866e-15
cg19849544	8	38508335		Island	----	9.90601e-45	++++	0.000124407
cg02722214	10	121578137	INPP5F;INPP5F	Island	----	1.02175e-44	++++	8.92885e-57
cg07565551	2	179062870	OSBPL6	S_Shelf	++++	1.02634e-44	----	2.9436e-71
cg23661466	10	63657173			----	1.06995e-44	++++	0.00446607
cg14484649	11	82444456	FAM181B	Island	----	1.07061e-44	++++	5.08253e-102
cg12262698	22	45704988	FAM118A;FAM118A	N_Shore	----	1.21292e-44	++++	2.94787e-16
cg05858126	10	104196213	MIR146B	S_Shelf	++++	1.24735e-44	----	5.08581e-56
cg26110130	1	42128455	HIVEP3;HIVEP3	Island	++++	1.2985e-44	++++	2.07367e-17		1
cg16330755	10	104613787	C10orf32;C10orf32	N_Shore	----	1.34671e-44	++++	9.6732e-54			1
cg21187770	2	26205876	KIF3C	S_Shore	----	1.4054e-44	----	0.00151984
cg25083618	10	94820988	CYP26C1	Island	----	1.40934e-44	++++	6.11215e-14
cg15553912	1	145415659	HFE2;HFE2;HFE2;HFE2	Island	----	1.66707e-44	++++	2.5675e-06
cg00075507	17	26708226	SARM1	Island	----	1.76905e-44	++++	1.54771e-56
cg05973792	5	150138866	DCTN4;DCTN4;DCTN4	S_Shore	----	1.81299e-44	++++	2.02678e-09
cg11642412	11	63768412	MACROD1	Island	----	1.88316e-44	++++	7.40409e-35
cg21104412	3	42978026		Island	----	1.99071e-44	++++	0.000622692
cg07870074	10	706006	DIP2C;C10orf108		++++	2.01662e-44	----	2.78949e-13
cg03622371	11	73000436	P2RY6;P2RY6;P2RY6;P2RY6		----	2.07531e-44	----	6.28266e-19
cg21737698	7	150644554	KCNH2;KCNH2	Island	----	2.09925e-44	++++	5.1186e-56
cg19699090	6	36808894		S_Shore	----	2.13827e-44	----	3.81026e-74
cg16968985	17	27313254	SEZ6;SEZ6	Island	----	2.19762e-44	++++	1.11881e-40
cg25171348	7	28448200	CREB5	N_Shore	----	2.34846e-44	++++	1.50312e-09
cg05329352	10	112838983	ADRA2A	Island	----	2.40486e-44	++++	4.39721e-62
cg17782713	10	22613360	BMI1	N_Shore	++++	2.6898e-44	----	1.90185e-88
cg01645998	16	82045222	SDR42E1	Island	----	2.80392e-44	++++	7.90251e-22
cg06623151	11	2293201	ASCL2	S_Shore	----	2.94328e-44	++++	5.43994e-07			1
cg13675837	17	54910204	DGKE	N_Shore	++++	3.22593e-44	----	4.68904e-135
cg02611085	7	128550410	KCP;KCP	Island	----	3.51842e-44	++++	3.89551e-50
cg25879142	7	4671391			----	3.57416e-44	----	3.65942e-08
cg27140633	11	63685905		Island	----	3.79714e-44	----	1.00273e-10
cg03102494	1	147801721			----	3.82009e-44	++++	0.00491857
cg10872209	10	104475308	SFXN2;ARL3	S_Shore	++++	3.91191e-44	----	3.71516e-54
cg07991586	16	50279175		N_Shore	----	3.94142e-44	----	7.96809e-40
cg10804656	10	22623460		Island	----	3.9447e-44	++++	0
cg08548500	13	113777160	F10;F10		----	4.09225e-44	----	5.00055e-38
cg27614751	12	95840596			----	4.10209e-44	++++	2.88688e-16
cg11125758	14	83591622			----	4.148e-44	----	0.00107356
cg26133266	17	37380827	STAC2	N_Shore	----	4.40049e-44	++++	4.00044e-05
cg12600197	15	75639339	NEIL1;NEIL1	N_Shore	----	4.51853e-44	++++	1.1821e-09
cg03877332	4	6247830		Island	----	4.74151e-44	++++	1.7802e-37
cg07763649	19	51380877	KLK2;KLK2		----	4.76774e-44	++++	2.9882e-20
cg19645639	1	113500384	SLC16A1	S_Shore	++++	5.1645e-44	----	9.31906e-45		1
cg25842356	5	126367370		S_Shore	----	5.30878e-44	++++	8.93869e-20			1
cg20599086	4	5574315	EVC2;EVC2	S_Shelf	++++	5.35797e-44	----	1.31654e-14
cg24893551	2	158453759	ACVR1C;ACVR1C;ACVR1C;ACVR1C	N_Shore	----	5.40715e-44	++++	0.00302591
cg05057976	11	65779667	CST6	Island	----	5.65964e-44	++++	2.17106e-13
cg15952487	1	158300733	CD1B		++++	5.89901e-44	----	1.08602e-05
cg06440946	1	95699313	RWDD3;RWDD3	N_Shore	----	6.23347e-44	----	1.37425e-09		1
cg15099418	3	117593637			++++	6.73845e-44	----	0.00105323
cg24414344	17	39019556	KRT12	Island	----	6.97126e-44	++++	7.52542e-15
cg18427091	17	30115417			++++	7.19424e-44	----	6.98438e-13
cg06821199	4	779230	CPLX1	Island	----	7.45656e-44	++++	2.8695e-44
cg13882377	10	126211811	LHPP;LHPP		----	7.72216e-44	----	8.46651e-09		1
cg22242842	2	85167149			----	8.01728e-44	----	1.27096e-72
cg13905081	9	140199209		S_Shore	----	8.04351e-44	----	1.68674e-35
[truncated: 14,527 more rows]

## Sheet: ssDMPs
CpG probe	CHR	MAPINFO	UCSC_REFGENE_NAME	RELATION_TO_UCSC_CPG_ISLAND	Direction sex	Bonferroni corrected p-value sex	Direction age	Bonferroni corrected p-value age	sDMP in Inoshita et al., 2015	sDMP in Singmann et al., 2015	sDMP in Yousefi et al., 2015	age-by-sex interaction in McCartnery et al., 2020 (Table S4)	Significant sex-age interaction (Supplementary File 3)
cg15772157	10	22766320		Island	----	0	-+++	5.83343e-67	0	0	1
cg18121224	5	176559563	NSD1;NSD1	Island	----	0	-+++	7.08603e-15	1	1	1
cg17493885	5	176559558	NSD1;NSD1	Island	----	0	-+++	1.50574e-11	1	0	1
cg12067522	15	52405000	BCL2L10	S_Shore	----	0	-+++	0.000585638	1	1	0
cg06962442	16	68271698		Island	++++	0	+---	0.00250552	1	0	1
cg19311244	4	77341912		N_Shore	----	0	++++	0.0322396	1	0	1
cg08063724	1	40367097	MYCL1;MYCL1;MYCL1	Island	---?	0	--++	0.0855832	0	0	0
cg17561788	22	20114683	RANBP1	N_Shelf	++++	0	+---	0.226845	0	0	1
cg20425293	12	93861147	MRPL42;MRPL42;MRPL42	N_Shore	----	0	-+++	0.97978	0	1	1
cg01065780	22	36019471	MB		----	0	+++-	1	1	0	1
cg01225095	12	32909323	YARS2	S_Shore	----	0	+---	1	1	1	1
cg01276128	19	39138334	ACTN4;ACTN4	Island	----	0	+++-	1	1	0	1
cg01413005	1	171561022	BAT2L2		++++	0	-+++	1	0	0	0
cg01882150	11	63933998	MACROD1	Island	----	0	-++-	1	1	0	1
cg01906879	3	81811016	GBE1	S_Shore	---?	0	+++-	1	1	1	1
cg02908189	8	146176269	ZNF16;ZNF16;ZNF16;ZNF16	Island	----	0	++--	1	1	0	1
cg03151810	8	144371745		Island	++++	0	-+++	1	1	0	1
cg03687700	2	24271844	FKBP1B;FKBP1B	N_Shore	----	0	++++	1	1	0	1
cg03894796	8	144361315		Island	++++	0	-+++	1	0	0	1
cg04637454	6	41651066		Island	----	0	+--+	1	1	0	1
cg04946709	16	59789030	LOC644649	Island	++??	0	+-+-	1	1	0	1
cg06225979	18	32957337	ZNF396	Island	----	0	+++-	1	1	1	1
cg07004386	14	70040391		N_Shore	----	0	-+++	1	1	0	1
cg07170752	1	225427173	DNAH14		+++?	0	+---	1	0	0	0
cg07586008	19	49636535	PPFIA3	Island	----	0	-+++	1	1	0	1
cg07628841	2	27851430	GPN1;CCDC121;GPN1;GPN1;CCDC121;CCDC121;GPN1;GPN1		---?	0	+++-	1	1	0	1
cg07816873	12	1100472	ERC1;ERC1;ERC1;ERC1;ERC1;ERC1;ERC1	Island	---?	0	+++-	1	1	0	1
cg08034535	4	140375469	RAB33B	Island	---?	0	+---	1	1	0	1
cg08037478	12	38545085			--??	0	+---	1	0	0	0
cg08615596	12	68758840			---?	0	-++-	1	1	0	1
cg09404617	7	134232463			----	0	---+	1	0	0	0
cg09725915	2	70369583		Island	---?	0	+++-	1	1	0	1
cg09850442	2	25896287	DTNB;DTNB;DTNB;DTNB;DTNB;DTNB;DTNB;DTNB;DTNB;DTNB	Island	----	0	+-+-	1	1	0	1
cg09971754	16	89557657	ANKRD11	Island	++++	0	+++-	1	1	0	1
cg10047026	17	4613992	ARRB2;ARRB2;ARRB2;ARRB2	Island	----	0	+++-	1	1	0	1
cg10546176	5	34929404	DNAJC21;DNAJC21	Island	----	0	+++-	1	1	0	1
cg10749792	7	56119218	PSPH;PSPH;CCT6A;CCT6A	Island	----	0	++--	1	0	0	1
cg11065518	2	207630263	MDH1B;FASTKD2;FASTKD2;FASTKD2;FASTKD2;FASTKD2;FASTKD2	S_Shore	----	0	----	1	1	0	1
cg11331556	5	32312356	MTMR12	Island	----	0	+++-	1	0	0	1
cg11388673	8	144371779		Island	++++	0	-+++	1	0	0	1
cg11841231	2	205543309	PARD3B;PARD3B;PARD3B		++++	0	-+++	1	1	0	1
cg12006399	15	84954185			----	0	++--	1	1	0	0
cg12052203	11	66115045	B3GNT1;B3GNT1	Island	+++?	0	++++	1	1	0	1
cg12204423	4	129732568	PHF17;PHF17	Island	++++	0	-++-	1	1	0	1
cg12451679	19	47617189	ZC3H4	S_Shore	++++	0	++++	1	1	0	1
cg12611527	2	157257110		Island	----	0	-+++	1	1	0	1
cg12611723	9	139940867	NPDC1	Island	----	0	-+++	1	1	1	1
cg12736438	13	111214457	RAB20	Island	----	0	++--	1	0	1	1
cg12900929	12	108154862	PRDM4;PRDM4	Island	---?	0	+++-	1	1	1	1
cg13346869	8	37605517	LOC728024;ERLIN2		----	0	-+++	1	1	0	1
cg13546935	2	29033780	SPDYA;SPDYA;SPDYA;SPDYA	Island	----	0	+++-	1	0	0	1
cg14030268	10	119135296	PDZD8	Island	----	0	+++-	1	0	0	1
cg14373579	9	133455264	LOC100272217;FUBP3	Island	----	0	+++-	1	1	0	1
cg16318112	1	969254	AGRN	Island	----	0	+++-	1	1	0	1
cg16383222	8	145688536	CYHR1	Island	----	0	-++-	1	1	1	1
cg16810031	17	38024146	ZPBP2;ZPBP2	Island	----	0	++++	1	0	0	0
cg17561891	7	86849173	C7orf23	Island	----	0	++--	1	1	0	1
cg17860381	5	142783569	NR3C1;NR3C1;NR3C1;NR3C1;NR3C1;NR3C1;NR3C1	Island	----	0	+++-	1	0	1	0
cg19590578	5	77266117		N_Shelf	----	0	-+-+	1	0	0	1
cg19731612	5	176559334	NSD1;NSD1	Island	----	0	-++-	1	1	0	1
cg20742366	22	29468997	KREMEN1;KREMEN1	Island	----	0	+++-	1	0	0	1
cg21120539	20	57582241	CTSZ;CTSZ	Island	----	0	+++-	1	1	0	1
cg22735601	4	13334645	HSP90AB2P		++++	0	---+	1	1	0	1
cg22999268	13	20532672	ZMYM2;ZMYM2	Island	----	0	+-+-	1	1	0	1
cg23001456	17	2615074	KIAA0664	Island	---?	0	+-+-	1	1	0	1
cg23758485	16	68482202	SMPD3	Island	----	0	++++	1	1	1	1
cg23778841	13	114239697	TFDP1;TFDP1		---?	0	+++-	1	0	0	0
cg23890282	6	33756082	LEMD2;LEMD2	Island	----	0	+--+	1	1	0	1
cg24158363	17	73401717	GRB2;GRB2;GRB2;GRB2	Island	----	0	+++-	1	1	0	1
cg25294185	11	65487814	RNASEH2C	Island	+++?	0	+---	1	1	0	1
cg25438440	3	98241168	CLDND1;CLDND1;CLDND1;CLDND1;CLDND1;CLDND1	N_Shore	----	0	--++	1	1	0	1
cg25697152	12	3067777	TEAD4;TEAD4;TEAD4	N_Shore	----	0	+-+-	1	1	0	1
cg25726513	4	1340596	KIAA1530	Island	----	0	+++-	1	0	1	1
cg26213873	1	112939056	CTTNBP2NL	Island	----	0	+++-	1	1	0	1
cg26328002	18	10455463	APCDD1	S_Shore	----	0	++--	1	1	0	1
cg27544294	22	25082493		S_Shore	+++?	0	++-+	1	0	0	0
cg27645294	17	21795257			----	0	++-+	1	1	0	1
cg22656420	2	74740238	TLX2	N_Shore	----	3.41021e-299	++++	0.410537	0	0	0
cg12767281	10	7452950	SFMBT2	Island	----	4.39393e-296	+++-	0.175232	0	1	1
cg15089217	3	123632556	CCDC14		++++	5.31206e-295	--+-	1	0	1	1
cg22744079	4	155410860	DCHS2;DCHS2	Island	----	1.08864e-287	-+++	1	1	0	0
cg24010336	19	39467258	FBXO17	S_Shore	----	8.91902e-287	--+-	1	1	1	1
cg25294504	20	9491559		N_Shelf	----	4.65625e-283	++-+	1	0	0	1
cg03332597	1	185125704	C1orf25;C1orf26;C1orf26	N_Shore	----	2.97082e-279	+++-	1	0	0	1
cg07462804	4	81105375	PRDM8	Island	----	3.73812e-275	+++-	1	0	0	1
cg25198113	1	5743886			----	5.27927e-275	++++	1	1	1	0
cg03316881	10	49515028		Island	----	2.24615e-272	+++-	1	1	1	0
cg07953307	16	29000920	LAT;LAT;LAT;LAT		++++	3.67254e-272	-+++	1	0	0	1
cg12900170	5	85913627	COX7C		----	6.62368e-268	----	1	0	0	1
cg02724127	3	129325706	PLXND1	S_Shore	----	8.72227e-265	+++-	1	0	0	1
cg11240062	8	144361073		Island	++++	1.56739e-264	-+++	1	1	0	1
cg26056348	7	75932317	HSPB1	Island	----	2.02645e-264	+++-	1	0	0	0
cg22549041	15	75019251	CYP1A1	Island	----	2.16417e-263	++--	1	0	0	1
cg13207534	6	5087447	PPP1R3G;PPP1R3G	S_Shore	----	6.16461e-263	+--+	1	0	0	0
cg18393722	15	85113863	UBE2QP1	Island	++++	8.59111e-263	--++	1	0	0	0
cg11924019	15	75019283	CYP1A1	Island	----	8.91902e-261	-+++	1	0	0	1
cg07731146	10	124768267	IKZF5;IKZF5;ACADSB	Island	----	4.72183e-260	+++-	1	1	0	0
cg18092474	15	75019302	CYP1A1	Island	----	9.14855e-260	-+-+	1	0	0	1
cg01185530	13	96329433	DNAJC3;DNAJC3	Island	----	1.06241e-255	+++-	1	1	0	1
cg16021159	1	57142074	PRKAA2		++++	1.51164e-254	-+-+	1	0	0	1
cg02530860	8	144371537		Island	++++	1.48541e-253	-+++	1	0	0	1
cg08319905	19	49636270	PPFIA3	Island	----	2.82982e-253	++++	1	1	0	1
cg22902089	11	46318223	CREB3L1	S_Shore	----	1.34441e-251	+---	1	1	1	1
cg23200371	12	56367680	RAB5B	Island	----	3.24626e-251	+++-	1	1	0	1
cg01293379	18	8610135	RAB12	Island	----	1.8625e-250	--+-	1	1	0	1
cg20000459	6	28744196			++++	2.35436e-249	+-+-	1	0	0	0
cg04202002	2	127643360		N_Shore	----	8.32879e-249	-+++	1	1	0	1
cg14207833	19	18945153	UPF1	S_Shelf	++++	1.8625e-248	----	1	1	1	0
cg07008193	11	46318527	CREB3L1	S_Shore	----	5.80392e-248	----	0.543339	0	1	1
cg24004478	7	855632	UNC84A;UNC84A	Island	++++	2.78063e-247	++++	1	1	1	1
cg22266749	4	110223959	COL25A1;COL25A1	Island	+++?	2.0658e-246	++++	0.0328233	1	0	1
cg18976797	7	56434617		N_Shore	----	1.66248e-245	-+++	1	0	0	0
cg01025774	5	42944457		Island	----	9.34529e-245	-+++	1	0	1	1
cg02611970	6	33313337			----	1.06897e-244	--+-	1	0	0	0
cg26172013	20	32031452	SNTA1;SNTA1	Island	----	8.72227e-242	+++-	0.529239	0	0	1
cg22610676	1	156393461	C1orf61	S_Shore	----	6.72205e-237	++++	1	0	1	1
cg06752594	1	109825964	PSRC1;PSRC1;PSRC1;PSRC1	Island	----	2.66587e-236	+++-	1	1	0	1
cg19929617	6	80656586	ELOVL4	N_Shore	++++	7.86972e-236	---+	1	0	0	1
cg00205605	1	2516401		N_Shore	----	2.15434e-234	----	1	0	0	1
cg20050113	2	103236861	SLC9A2	S_Shore	----	4.32835e-234	++++	1	0	0	1
cg20422417	2	25427108		Island	----	2.53798e-232	-++-	1	0	0	1
cg13570656	15	75019196	CYP1A1	Island	----	2.07236e-231	-++-	1	0	0	1
cg08167066	2	10220455	CYS1;CYS1	Island	----	2.49536e-231	+++-	1	0	0	0
cg14686645	17	42452426	ITGA2B		----	4.4923e-231	++-+	1	1	0	1
cg01225317	1	205473878	CDK18;CDK18;CDK18;CDK18;CDK18;CDK18	Island	----	4.88578e-231	+-+-	1	1	1	1
cg02826525	2	39186885	LOC375196;LOC100271715	Island	----	4.06602e-229	++++	1	0	0	1
cg12101586	15	75019203	CYP1A1	Island	----	3.96765e-228	-+--	1	0	0	1
cg24960291	3	185538892	IGF2BP2;IGF2BP2	N_Shelf	++++	1.35097e-226	---+	1	0	0	0
cg11565911	12	72233249	TBC1D15;TBC1D15;TBC1D15;TBC1D15	N_Shore	----	4.95137e-225	-+-+	1	1	0	1
cg05549655	15	75019143	CYP1A1	Island	----	2.74784e-223	++-+	1	0	0	1
cg03081205	11	32851371	PRRG4	Island	----	1.40999e-222	+++-	1	0	0	1
cg12792250	2	133106819		N_Shelf	----	4.06602e-222	++++	1	0	0	1
cg14392066	9	130497359	TOR2A;TOR2A;TOR2A;TOR2A	Island	----	6.78763e-222	+++-	0.531862	0	0	1
cg24474701	18	55289098	NARS;NARS	Island	----	1.09848e-221	++--	1	0	0	0
cg15817705	1	209406063		S_Shore	++??	8.95181e-221	----	1	1	1	1
cg13607218	2	71118823		S_Shelf	----	1.04274e-219	++++	0.0497104	0	0	1
cg19510698	15	101421249	ALDH1A3	S_Shore	----	7.80414e-219	++++	1	0	1	1
cg22345911	17	80231263	CSNK1D;CSNK1D;CSNK1D;CSNK1D	Island	--??	3.77091e-218	+-+-	1	1	0	1
cg21199072	4	137316362			++++	7.9353e-218	+++-	1	1	0	1
cg11559198	2	232348794		Island	----	3.63975e-217	++++	1	1	0	1
cg08354681	6	4773278	CDYL	N_Shore	++++	6.82042e-217	-+--	1	1	0	1
cg07381872	1	61408076			++??	1.05913e-215	-+-+	0.0224287	0	0	0
cg00153101	1	2431753	PLCH2	N_Shore	----	6.26299e-215	-+-+	1	0	0	1
cg09066361	7	126890254	GRM8	N_Shore	----	4.22997e-214	-+-+	1	1	0	1
cg03199192	15	34491893	C15orf29		----	7.64019e-214	---+	1	1	0	1
cg10638827	16	56665855	MT1M	N_Shore	----	2.61668e-213	-+-+	1	1	0	1
cg00243574	12	54410727	HOXC4;HOXC5;HOXC4;HOXC6;HOXC6	N_Shore	++++	3.443e-213	++--	1	1	0	1
cg10340038	2	204193727	ABI2	Island	----	1.1903e-211	+++-	1	0	0	0
cg07645761	16	2892518	TMPRSS8	N_Shore	++++	2.75112e-211	++++	0.588917	0	0	1
cg26631144	8	30670260	PPP2CB;PPP2CB;PPP2CB;PPP2CB	Island	----	2.9118e-211	+-+-	1	0	0	0
cg10003657	11	65180133	FRMD8		++++	2.87573e-210	--+-	1	0	0	0
cg19941450	3	140950619	ACPL2;ACPL2	Island	----	4.00044e-210	+++-	1	0	1	1
cg03492827	7	72838601		Island	----	1.5346e-209	--++	1	1	0	1
cg23897302	14	103393970	AMN	N_Shore	----	7.11554e-208	----	1	1	0	1
cg04055615	6	31697723	DDAH2	Island	----	1.0493e-207	-+++	1	0	0	1
cg13430552	2	25427652		S_Shore	----	6.59089e-207	--+-	1	1	0	1
cg10574074	10	92922714			----	8.06646e-207	+-+-	1	0	0	1
cg25452172	12	58162751	METTL1;METTL1	N_Shelf	++??	4.42672e-206	+-+-	1	0	0	0
cg15192736	22	49448123		Island	++++	6.45973e-206	+++-	1	0	0	1
cg12000131	17	27941776	ANKRD13B;CORO6	N_Shore	----	1.14111e-205	--+-	1	0	0	1
cg20401945	16	29912460	ASPHD1	N_Shore	----	3.73812e-205	++++	1	1	0	0
cg05132077	22	49448320		S_Shore	++++	6.45973e-205	++++	1	0	0	1
cg21126707	12	81111012	MYF5	Island	----	2.91508e-204	++++	0.110701	0	0	1
cg08270240	19	21933659	LOC641367;ZNF100	Island	++++	1.02962e-203	+-++	1	0	0	0
cg18914514	18	18822123	GREB1L	Island	----	1.98055e-203	+++-	1	0	0	1
cg00245850	8	143925513	GML		++++	2.30517e-203	+---	1	0	0	0
cg16547629	1	44884131	RNF220	Island	----	1.99694e-201	++++	0.0138933	0	0	1
cg15823502	6	41650768		Island	----	3.31184e-200	+---	0.61974	0	0	1
cg05330360	17	38023993	ZPBP2;ZPBP2	N_Shore	----	8.32879e-200	++++	1	1	0	1
cg11620896	11	65627023	MUS81;CFL1	Island	----	1.1903e-199	+++-	1	0	0	1
cg16398944	6	57182319	PRIM2		----	2.31173e-198	+--+	1	0	0	0
cg22970003	7	157406032	PTPRN2;PTPRN2;PTPRN2	Island	++++	4.75462e-197	-++-	1	1	0	1
cg04831505	12	72233240	TBC1D15;TBC1D15;TBC1D15;TBC1D15	N_Shore	----	8.13204e-197	-+--	1	1	0	1
cg05020125	8	37605552	LOC728024;ERLIN2		----	8.39437e-195	++++	1	0	1	0
cg14206172	19	39466757	FBXO17	S_Shore	----	4.29556e-193	+++-	1	0	1	1
cg23299919	7	157406096	PTPRN2;PTPRN2;PTPRN2	Island	++++	5.37764e-193	----	1	0	0	1
cg01884321	4	15683497	LOC285550;LOC285550	Island	----	2.0035e-192	+++-	1	1	0	1
cg15371801	2	232348684		Island	----	7.18112e-192	++++	1	0	0	1
cg05868531	2	232348602		Island	----	8.95181e-192	++++	1	1	0	1
cg24016844	1	111506641	C1orf103;C1orf103	Island	++??	2.4724e-190	++--	1	1	0	1
cg08877188	3	195943579	OSTalpha;OSTalpha		----	5.60718e-190	++++	1	0	0	1
cg04761231	9	127623571	RPL35	Island	++++	4.26276e-189	--++	1	0	0	0
cg00030604	1	2379831			++++	5.73834e-189	----	1	0	0	1
cg19463256	19	46915351	CCDC8	Island	----	6.45973e-189	++++	0.861734	0	1	1
cg01883777	22	38201848	H1F0	N_Shore	----	8.78785e-188	-+--	1	0	0	1
cg05630773	16	3016717	KREMEN2;KREMEN2	Island	----	2.47568e-187	++++	1	0	0	1
cg22863798	9	130889913	LOC389791;PTGES2;PTGES2;PTGES2	Island	++++	2.68226e-187	+++-	1	0	1	1
cg25327233	10	99894913	C10orf28	Island	----	2.80359e-187	+-+-	1	0	0	1
cg16270222	17	41446396		Island	----	3.24298e-187	+++-	1	0	0	1
cg22178392	5	150459690	TNIP1	N_Shore	++++	4.4923e-187	--+-	1.60641e-09	1	0	0
cg05010260	7	100820291	C7orf52	N_Shelf	----	3.443e-186	++++	1	0	0	1
cg15104066	12	90102578	LOC338758	Island	----	9.64041e-186	+-+-	1	0	0	1
cg25274157	19	19626576	NDUFA13;TSSK6	Island	----	1.06897e-185	----	1	0	1	1
cg20047230	16	19535092	CP110	Island	----	8.91902e-185	++++	1	1	0	1
cg15085024	6	43304175	ZNF318		++++	1.51492e-184	+--+	1	0	0	0
cg18795569	19	3480508	C19orf77;C19orf77	N_Shore	++++	1.56739e-184	+++-	1	0	1	1
cg25910261	7	157405965	PTPRN2;PTPRN2;PTPRN2	Island	++++	4.32835e-183	++++	1	1	0	1
cg19884634	7	127992634	PRRT4	S_Shore	----	5.83671e-183	----	1	0	1	1
cg24574963	7	149120622		S_Shore	----	1.79036e-182	-+++	1	0	1	1
cg13655082	9	125109046		Island	----	3.14133e-182	-+++	1	1	0	0
cg26052357	1	91303544		S_Shore	----	1.42967e-181	++++	0.044923	0	0	1
cg19238521	6	28497344	GPX5;GPX5		++++	3.70533e-181	---+	1	0	0	0
cg09795027	17	74006440	EVPL	S_Shore	++++	4.72183e-181	++++	0.442016	0	0	0
cg06596054	12	57998581	DTX3		----	1.71166e-180	+-+-	1	0	0	1
cg02500042	4	77342788		S_Shore	----	4.09881e-180	+---	1	0	0	1
cg06930757	19	51216389	SHANK1	N_Shelf	++++	1.84611e-179	+--+	1	0	0	0
cg19292062	20	524344	CSNK2A1;CSNK2A1;CSNK2A1;CSNK2A1;CSNK2A1;CSNK2A1	Island	----	3.70533e-179	+++-	2.95344e-07	0	0	1
cg03080147	8	17270347	MTMR7	N_Shore	----	4.75462e-179	++-+	1	0	1	1
cg12247968	13	72441711	DACH1;DACH1;DACH1	S_Shore	----	6.95159e-179	+++-	1	0	0	1
cg18067793	3	129346288		Island	----	1.88873e-178	-+++	1.43622e-12	0	0	0
cg06122000	6	83775663	UBE2CBP	Island	----	4.1316e-178	+-+-	1	0	0	1
cg01550017	5	42924215		Island	----	9.27971e-178	-+++	4.51525e-05	0	1	1
cg06281680	2	232347922		N_Shore	----	1.2362e-177	----	1	1	0	1
cg03727500	2	232348334		Island	----	3.13805e-177	++--	1	1	0	1
cg21269758	1	25870003	LDLRAP1	Island	----	3.86928e-177	+++-	1	0	0	1
cg05951817	17	28562142	SLC6A4	N_Shore	----	1.39032e-176	-+++	0.00175593	1	0	0
cg04913934	16	11836713	TXNDC11	Island	----	8.49274e-175	+++-	1	0	0	0
cg15633893	5	25909518		Island	----	3.90207e-173	+++-	1	0	0	0
cg17330048	5	80257322	RASGRF2	S_Shore	----	6.95159e-173	----	1	1	0	1
cg01433297	20	4151816	SMOX;SMOX;SMOX;SMOX	N_Shore	----	1.11816e-172	+--+	1	0	1	0
cg06682875	5	115150172	CDO1	N_Shore	----	1.15423e-172	-+++	1	0	0	1
cg02510471	12	54368639	HOXC11	Island	----	2.01662e-172	+++-	1	1	0	1
cg23457166	6	127797286	C6orf174	Island	----	5.11532e-172	++-+	1	0	0	1
cg26039042	8	144815275	FAM83H	Island	----	8.03367e-172	-++-	1	0	0	1
cg20617917	17	7287100	TNK1	N_Shore	----	9.73878e-172	--+-	1	0	0	1
cg22171758	12	54146133		S_Shore	----	1.51164e-171	----	0.0100962	0	1	1
cg02905198	12	54070610	ATP5G2;ATP5G2	N_Shore	----	1.2526e-170	++-+	1	0	1	1
cg22676763	19	8273917	LASS4	Island	----	7.77135e-170	+++-	1	0	0	1
cg16653408	22	42313569		N_Shore	----	2.1445e-169	----	1	0	0	1
cg10342304	17	730170	NXN		++++	4.36114e-169	----	1	0	0	1
cg09239106	12	49937997	KCNH3		----	1.38704e-168	-+--	1	0	1	0
cg23008871	17	45949743		Island	----	2.71505e-168	++++	1	0	0	1
cg23652484	1	211872653			----	1.21981e-167	----	0.181561	1	1	0
cg03122264	6	127797208	C6orf174	Island	----	1.00667e-166	++-+	1	0	0	1
cg12356266	8	99984350		N_Shore	----	1.5805e-166	---+	1	0	1	1
cg15175162	4	15657657	FBXL5;FBXL5	Island	----	2.92819e-166	-+++	1	1	0	1
cg17743279	7	92463268	CDK6;CDK6	Island	--??	3.8037e-166	+++-	1	1	1	1
cg17789713	2	164571035	FIGN		++++	1.19357e-165	---+	1	0	0	0
cg10432947	4	2062441	NAT8L	Island	----	1.60018e-165	++++	1	0	1	1
cg15496335	1	2377971		S_Shelf	++++	2.31173e-165	++++	1	0	0	0
cg24016624	19	45504513	RELB	N_Shore	++++	2.6134e-165	++++	1	0	0	1
cg05044764	16	51175026	SALL1;SALL1		++++	2.9741e-165	+-+-	1	0	0	0
cg07337544	2	96013196	KCNIP3;KCNIP3	Island	----	1.14111e-164	++-+	1	0	0	0
cg14482569	11	130185651	ZBTB44	S_Shore	----	1.42967e-164	++++	1	0	0	1
cg07434500	21	30671675	BACH1;BACH1	Island	----	2.6298e-164	+++-	1	0	0	1
cg05714155	2	172974735		S_Shore	----	7.50902e-164	++++	1	0	0	0
cg13348458	6	27569671			++++	2.04613e-163	+++-	1	0	1	1
cg18174881	14	45723353	C14orf106	S_Shore	----	2.30845e-163	---+	1	0	0	1
cg05518842	16	1823291	MRPS34;EME2	Island	----	2.72817e-163	+++-	1	0	0	1
cg04187433	2	27037441			----	1.13127e-162	++-+	1	0	0	0
cg27532171	1	46952054		S_Shore	----	5.70555e-162	++++	0.0543666	0	0	1
cg16743289	1	174968144	CACYBP;CACYBP	N_Shore	----	6.72205e-162	++++	1	0	0	0
cg02055264	6	27210913			----	1.27555e-161	++++	0.397093	0	0	1
cg07824824	18	12254976	CIDEA;CIDEA	Island	----	2.05269e-161	++++	0.0146147	0	0	1
cg00293303	12	1553525	ERC1;ERC1;ERC1;ERC1;ERC1		----	2.07236e-161	---+	1	0	0	1
cg00325531	1	75591353		Island	----	2.26254e-161	++++	0.0180053	0	0	1
cg03934782	16	77822989	VAT1L	Island	----	6.06624e-161	+++-	1	0	0	1
cg02050426	18	59221458	CDH20	Island	----	8.88623e-161	++++	0.428572	0	0	1
cg02470045	19	56146928			++++	1.19357e-160	----	0.482676	1	0	0
cg07355745	6	27571093			++++	2.43633e-160	----	1	0	0	1
cg23378165	17	9550256	USP43	S_Shore	----	1.31162e-159	-+++	1	0	1	1
cg07041748	16	30023780	DOC2A	S_Shore	----	6.26299e-159	++-+	0.000902067	0	1	0
cg15148078	19	3480561	C19orf77	N_Shore	++++	1.7838e-158	+++-	1	0	1	1
cg09933329	7	44186183	GCK;GCK;GCK	Island	----	1.05913e-157	-+-+	1	0	0	1
cg22105158	19	3480672	C19orf77	N_Shore	++++	1.06241e-157	-+--	1	0	1	1
cg11704490	2	162284894		S_Shore	----	2.43961e-157	++-+	1	0	0	1
cg11837402	20	17949715	SNX5;C20orf72;SNX5	Island	----	3.60695e-157	++++	1	0	0	1
cg09796583	10	73156647	CDH23;CDH23	Island	----	2.91508e-156	+++-	1	0	0	1
cg06768010	2	74729502	LOC151534;LBX2	Island	----	4.85299e-156	-+++	1	0	0	1
cg01043616	12	50475035	ACCN2;ACCN2	Island	----	5.27927e-156	++++	1	1	0	1
cg18223453	17	59554746	TBX4		----	2.02645e-155	++++	1	0	0	1
cg02026141	10	23492470		S_Shelf	----	3.60696e-155	+++-	1	0	0	1
cg09514174	1	36916681	OSCP1;OSCP1	S_Shore	----	1.98055e-154	-+-+	1	0	0	0
cg16137147	1	221067896		Island	----	1.14767e-153	++++	0.304034	0	0	0
cg22867608	10	64573356	EGR2;EGR2;EGR2;EGR2	Island	----	1.52804e-153	-+++	1	0	0	0
cg01135546	17	45949828		Island	----	1.70839e-153	-++-	1	0	0	1
cg03129014	13	20736156	GJA3	Island	----	6.98438e-153	-+-+	1	0	0	0
cg17188169	6	74104388	DDX43;DDX43	N_Shore	----	1.28867e-152	-+++	1	0	0	0
cg12414681	15	29968195		S_Shore	----	3.86928e-152	++++	0.0466281	0	0	0
cg19766489	1	78511344	GIPC2	N_Shore	----	5.5088e-152	+---	1	0	0	1
cg15283852	17	9550296	USP43	S_Shore	----	8.13204e-152	+++-	1	0	0	1
cg00655923	7	64895418			++++	1.49197e-151	+-+-	1	0	0	1
cg26687119	1	156828442	NTRK1;INSRR;INSRR	N_Shore	----	2.24943e-151	+---	1	0	1	1
cg13230424	17	45930033	SP6	S_Shore	----	3.443e-151	++++	0.0276817	0	0	1
cg09766820	1	75593018	LHX8	S_Shore	----	4.22997e-151	++++	1	0	1	1
cg14554415	15	69222988	MIR548H4;NOX5;NOX5;SPESP1;SPESP1	Island	----	4.72183e-151	++++	1	0	0	1
cg23373640	14	65696480			----	7.08275e-151	++++	1	1	1	1
cg00937681	4	77723304		Island	----	1.09848e-150	++++	1	1	0	1
cg04941728	16	718125	RHOT2	Island	----	1.30178e-150	+++-	1	0	0	0
cg03569507	17	46114237	COPZ2	N_Shore	----	2.46912e-150	----	1	1	0	0
cg09408902	2	121338544		S_Shelf	----	2.81015e-150	-+++	1	0	0	0
cg25454270	11	116661678	APOA5;APOA5	S_Shore	----	1.22964e-149	-+++	1	0	0	1
cg12045875	6	74104594	DDX43;DDX43	Island	----	1.46246e-149	-+++	1	0	0	0
cg20068058	11	46317859	CREB3L1	S_Shore	----	2.61668e-149	++-+	1	0	0	1
cg16604218	1	45452605	EIF2B3;EIF2B3	S_Shore	----	8.23042e-149	++-+	1	0	0	1
cg27532360	17	42452994	ITGA2B		----	2.21336e-148	----	1	1	0	1
cg09826056	1	78511360	GIPC2	N_Shore	----	2.51175e-148	-+++	1	0	0	1
cg14074251	2	220299116	SPEG	N_Shore	----	3.01017e-148	+++-	1	1	0	0
cg05221720	6	70991229	COL9A1;COL9A1	N_Shore	----	3.443e-148	-+++	1	0	0	1
cg11437810	15	69744829	RPLP1;RPLP1	N_Shore	----	3.63975e-148	++++	1	0	0	0
cg04388657	9	127623377	RPL35	N_Shore	++++	2.09859e-147	----	0.351514	0	1	1
cg07219978	12	38548782			----	2.72161e-147	---+	1	0	0	0
cg17885030	19	52836583		N_Shelf	++++	2.73801e-147	+--+	1	0	0	1
cg14295062	9	139949108	ENTPD2;ENTPD2	S_Shore	----	3.06919e-147	----	1	0	0	0
cg23370946	4	183061955	MGC45800	N_Shore	----	1.59034e-146	++++	1	0	0	1
cg14616345	9	133901267	LAMC3	N_Shore	++++	1.74773e-146	+---	0.000282031	0	0	0
cg20031364	17	36731152	SRCIN1	S_Shore	----	2.28878e-146	+++-	1	0	0	1
cg03725447	1	860008	SAMD11	Island	----	4.4923e-146	+++-	0.028531	0	0	0
cg23486179	3	49466665	NICN1	Island	----	4.78741e-146	+-+-	6.3384e-05	0	0	0
cg26218577	15	69744466	RPLP1;RPLP1	N_Shore	----	5.47601e-146	++-+	1	0	0	0
cg14721981	20	21381070		S_Shelf	----	5.70555e-146	++-+	1	1	0	1
cg18923051	1	156053080	MEX3A	S_Shore	----	2.0822e-145	+--+	1	1	0	0
cg07107628	6	27210934			----	2.53143e-145	++++	1	0	0	1
cg13587180	4	42403248	SHISA3	S_Shelf	----	3.02656e-145	-+++	1	0	1	1
cg27329091	2	213698049		Island	----	2.63636e-144	-+-+	1	0	0	1
cg00469015	15	69744684	RPLP1;RPLP1	N_Shore	----	3.10526e-144	++-+	1	0	0	0
cg18932078	1	2524107	MMEL1	N_Shelf	----	3.57416e-144	----	0.0755493	0	0	1
cg18479961	7	150935476	MIR671;CHPF2	S_Shore	++++	8.95181e-144	----	1	0	0	0
cg24790297	19	51226357	CLEC11A	N_Shore	----	1.89529e-143	--+-	1	0	1	0
cg26466145	3	188665930		S_Shore	----	3.67254e-143	-+++	0.000201465	0	0	0
cg19551420	11	33891639	LMO2;LMO2;LMO2	S_Shore	----	5.41043e-143	++++	1	0	0	1
cg04459939	15	90291141		N_Shelf	----	1.12799e-142	-+++	1	0	0	1
cg15254881	7	126890512	GRM8	N_Shore	----	1.29195e-142	-+--	1	0	0	1
cg27462519	16	3242639		Island	++++	1.32474e-142	++++	1	0	0	0
cg05693982	12	12940390	APOLD1;APOLD1	Island	----	2.27894e-142	-+-+	1	0	0	1
cg01937803	14	103605307		Island	----	2.78391e-142	+-+-	1	0	0	1
cg03669949	6	74104426	DDX43;DDX43	Island	----	3.83649e-142	-+++	1	0	0	0
cg12728621	20	34743092	EPB41L1;EPB41L1		----	6.88601e-142	----	1	1	0	1
cg03626579	19	58868858	ZNF497	Island	----	1.12799e-141	++-+	1	0	1	1
cg01076129	6	49681334	CRISP2;CRISP2;CRISP2;CRISP2;CRISP2		----	2.9741e-141	++++	0.27908	0	0	1
cg06666376	19	3480596	C19orf77	N_Shore	++++	2.98394e-141	+++-	1	1	1	1
cg09065876	17	45949756		Island	----	3.02001e-141	++++	0.95322	0	0	1
cg17055821	17	30669476	C17orf75	S_Shore	----	4.1316e-141	-++-	1	0	0	1
cg02991085	20	30073537	NCRNA00028	S_Shore	----	6.72205e-141	++++	1	0	0	1
cg00425710	16	56672671	MT1A	S_Shore	----	7.70577e-141	++-+	1	0	1	1
cg01486818	1	2409335	PLCH2	N_Shore	++++	1.45262e-140	+--+	1	0	0	0
cg27446137	4	77723198		Island	----	1.9871e-140	+--+	1	1	0	1
cg04974775	5	114516854	TRIM36;TRIM36;TRIM36	S_Shore	----	2.54782e-140	---+	1	1	0	1
cg05833851	13	100548910	CLYBL	Island	----	2.95114e-140	++-+	1	0	0	1
cg25144111	6	127796312	C6orf174	Island	----	4.32835e-140	++-+	1	0	0	1
cg02757970	2	25427350		Island	----	6.95159e-140	-+++	1	0	0	1
cg02350740	4	188686726			----	1.24276e-139	--++	1	0	0	0
cg11097968	14	103012188		S_Shore	----	2.45929e-139	--++	1	0	0	0
cg09068286	5	179779115	GFPT2	Island	----	2.66915e-139	++++	1	0	0	0
cg07031872	14	92788417	SLC24A4	N_Shore	----	3.60695e-139	-++-	1	1	1	1
cg26107597	14	31343283	COCH;COCH	N_Shore	----	6.75484e-139	++++	1	0	1	1
cg26715042	6	49681307	CRISP2;CRISP2;CRISP2;CRISP2;CRISP2		----	8.85344e-139	++++	1	0	0	1
cg24755137	2	133062155			----	1.02634e-138	++++	1	0	0	0
cg14300568	18	57567149	PMAIP1	Island	----	1.82971e-138	+++-	1	0	0	0
cg23612557	16	3014320	KREMEN2;KREMEN2;KREMEN2;KREMEN2	Island	----	3.60696e-138	++-+	1	0	0	1
cg23904247	14	102554826	HSP90AA1;HSP90AA1	S_Shore	----	4.09881e-138	++--	1	0	0	1
cg03371609	8	52322171	PXDNL	Island	----	6.32857e-138	++++	0.0466609	0	0	1
cg24014869	19	7928751	EVI5L;EVI5L	Island	----	7.41065e-138	++++	0.218516	0	1	1
cg25974617	8	71520962	TRAM1	S_Shore	----	1.93792e-137	-+++	1	0	0	1
cg23166988	16	2070861		Island	----	2.16745e-137	-+--	1	0	0	0
cg11174255	4	1513259		N_Shore	++++	4.03323e-137	+-++	1	1	0	1
cg10334916	2	241508098	RNPEPL1	N_Shore	++++	1.11488e-136	+++-	1	1	0	1
cg00719651	12	47225449		Island	----	1.87234e-136	+++-	1	0	0	1
cg10525394	6	158097037		S_Shelf	++++	2.93475e-136	-+++	1	0	1	0
cg22497095	6	28601375		N_Shore	----	6.1974e-136	-+++	1	0	0	1
cg08124399	6	74104868	DDX43	Island	----	6.65647e-136	-+++	1	0	0	1
cg20841377	4	151937227	LRBA	Island	----	6.72205e-136	-+--	1	0	1	1
cg25034424	4	1513089		N_Shore	++++	1.40999e-135	++++	1	1	0	1
cg23009419	3	46618597	LRRC2;TDGF1	Island	----	2.31173e-135	-+++	1	0	0	1
cg00871698	14	53417998	FERMT2;FERMT2;FERMT2	Island	----	2.98066e-135	+++-	1	0	0	0
cg16545105	5	76248749	CRHBP;CRHBP	N_Shore	----	3.18724e-135	++-+	0.698766	0	1	0
cg09886641	15	69223018	MIR548H4;NOX5;NOX5;SPESP1	Island	----	3.20363e-135	++++	1	0	0	1
cg13947929	17	43863356	CRHR1;CRHR1;CRHR1;CRHR1	S_Shore	----	9.18134e-135	+++-	1	1	0	0
cg14774755	8	70980603	PRDM14	N_Shore	----	1.21981e-134	+-++	1	0	1	1
cg14466942	6	17282700	RBM24;RBM24;RBM24	S_Shore	----	1.44606e-134	---+	1	0	0	1
cg23019286	1	227728774		N_Shore	++++	1.99694e-134	++-+	1	0	0	1
cg15166296	12	81101022	MYF6	N_Shore	----	3.86928e-134	++-+	1	0	0	1
cg11007120	13	95366456		S_Shore	----	8.42716e-134	-+-+	1	0	0	1
cg20509869	2	220375605		N_Shelf	----	9.6732e-134	++++	1	0	0	1
cg00934883	6	30711966	IER3	Island	----	1.41655e-133	-+--	1	1	1	1
cg19560927	19	46995312	PNMAL2;PNMAL2	N_Shore	----	2.00022e-133	--+-	1	0	1	0
cg06717221	19	1790921	ATP8B3	S_Shore	++++	3.77091e-133	++++	1	0	0	1
cg22697684	17	9550173	USP43	S_Shore	----	3.77091e-133	-+-+	1	0	0	1
cg06616765	19	8570636		Island	----	1.07225e-132	+-+-	1	0	1	1
cg00690609	10	72218900		S_Shore	----	1.11816e-132	-+++	1	0	0	1
cg27535677	6	28601365		N_Shore	----	1.70183e-132	-+++	1	0	0	1
cg09634707	10	72219713		S_Shore	----	2.32813e-132	-++-	1	0	0	1
cg23414861	6	74064064	DPPA5	Island	----	2.58061e-132	-+--	1	0	0	1
cg27080725	7	100075304	TSC22D4	Island	----	2.87901e-132	+-+-	1	0	0	0
cg11719952	11	75140567	KLHL35	N_Shore	----	3.00033e-132	++++	0.10411	0	0	1
cg25390787	6	49681299	CRISP2;CRISP2;CRISP2;CRISP2;CRISP2		----	3.90207e-132	++++	1	0	0	1
cg17205324	14	23835595	EFS;EFS	Island	----	4.85299e-132	-+++	1	0	0	1
cg19123916	4	48484788	SLC10A4	N_Shore	----	7.27949e-132	-+-+	0.00054629	0	0	1
cg26865747	6	28601377		N_Shore	----	8.13204e-132	-+++	1	0	0	1
cg10502244	12	48399295	COL2A1;COL2A1	Island	----	1.41327e-131	+++-	1	0	1	1
cg19280206	3	196694932	PIGZ	N_Shore	----	1.5969e-131	-+++	1	0	0	1
cg07242196	7	112556814	C7orf60		++++	3.12166e-131	--+-	1	0	0	0
cg06686742	19	8273505	LASS4	N_Shore	----	4.72183e-131	--+-	1	0	0	0
cg26706163	19	59073369	MZF1;MZF1;LOC100131691	N_Shore	----	1.36081e-130	++++	0.011316	0	0	1
cg03792788	2	121338607		S_Shelf	----	1.37392e-130	-+++	1	0	0	0
cg16248798	1	247271246		N_Shelf	----	1.82315e-130	++++	1	0	0	0
cg27479634	12	54070545	ATP5G2;ATP5G2	N_Shore	----	2.51503e-130	----	0.860095	0	0	1
cg05159145	2	26205493	KIF3C	Island	----	2.79375e-130	++++	0.995192	0	0	0
cg19488431	6	28601329		N_Shore	----	3.54137e-130	-+++	1	0	0	0
cg06586599	19	7587541	MCOLN1;MCOLN1	Island	----	4.03323e-130	+---	2.41896e-08	0	0	1
cg10742957	19	39466716	FBXO17	S_Shore	----	7.2467e-130	--+-	0.00112767	0	1	1
cg22857963	8	144358043	GLI4	Island	++++	1.00995e-129	-++-	1	0	0	0
cg14636804	2	636937		Island	----	1.01323e-129	++++	0.945022	0	0	0
cg14026788	12	72233266	TBC1D15;TBC1D15;TBC1D15;TBC1D15	N_Shore	----	1.21653e-129	+++-	1	1	0	1
cg15922705	6	70991156	COL9A1;COL9A1	N_Shore	----	1.38704e-129	-+++	1	0	0	1
cg01005506	10	64565768	ADO;ADO	Island	++++	2.1445e-129	-+++	1	0	0	0
cg17394530	6	106434623		S_Shore	----	2.54126e-129	-+-+	1	0	1	0
cg07251887	17	73641809	LOC100130933;RECQL5		----	3.19379e-129	---+	1	0	1	0
cg02758247	18	59222050	CDH20	S_Shore	----	5.01695e-129	++++	1	0	0	1
cg19001789	13	111464554		N_Shore	----	6.00066e-129	+++-	1	0	0	1
cg04502620	16	30020843	DOC2A	N_Shore	----	6.85321e-129	++++	0.904362	0	1	0
cg14916924	9	129433969	LMX1B	Island	----	7.41065e-129	++++	1	0	0	0
cg09786098	16	3016378	KREMEN2;KREMEN2	N_Shore	----	1.25916e-128	++++	0.0177593	0	0	1
cg04595372	6	49681233	CRISP2;CRISP2;CRISP2;CRISP2;CRISP2;CRISP2;CRISP2;CRISP2;CRISP2;CRISP2		----	1.26571e-128	++++	1	0	0	1
cg10716823	15	69744850	RPLP1;RPLP1	N_Shore	----	1.60673e-128	++++	0.893213	0	0	0
cg02359712	5	77280597			----	1.85594e-128	++++	1	0	1	1
cg03613132	8	37888764	EIF4EBP1	Island	----	2.12155e-128	--++	1	0	1	1
cg03923438	16	56672722	MT1A	S_Shore	----	2.60684e-128	-+++	1	0	1	1
cg25663304	5	176172918		S_Shelf	++++	7.96809e-128	+--+	1	0	0	1
cg05347456	16	89690262	DPEP1;DPEP1		----	1.0329e-127	--++	1	0	0	0
cg24195486	14	92788580	SLC24A4	N_Shore	----	1.09848e-127	++++	1	0	1	1
cg01001533	10	44184868		N_Shore	----	1.10176e-127	++++	1	0	1	1
cg03070187	19	6739184	TRIP10	N_Shore	----	1.19357e-127	+-++	1	0	0	0
cg09662920	1	78511433	GIPC2	N_Shore	----	1.28211e-127	+++-	1	0	0	1
cg02472291	8	67783002	C8orf45;C8orf45;C8orf45;C8orf45;C8orf45		----	7.11554e-127	+++-	1	0	0	1
cg20133923	20	3027467	MRPS26	Island	++++	1.1739e-126	---+	1	0	0	0
cg25502144	20	30073546	NCRNA00028	S_Shore	----	1.19357e-126	+++-	1	0	0	1
cg01355392	20	62679255	SOX18	N_Shore	++++	1.29195e-126	-+-+	1	0	1	0
cg03785755	6	26196794		N_Shore	++++	1.37392e-126	----	1	0	1	0
cg00422488	9	100747767	ANP32B	Island	++++	2.71177e-126	----	1	0	0	0
cg11557618	2	172974138		S_Shore	----	2.92163e-126	-+-+	1	1	0	0
cg18694169	6	28227079	NKAPL	Island	----	3.10198e-126	++++	1	0	0	0
cg01763636	12	132568565	EP400NL	N_Shore	----	3.34463e-126	++--	2.98361e-13	0	0	1
cg19708901	1	180882655	KIAA1614	S_Shore	----	4.55788e-126	----	1	0	0	0
cg18192325	2	105854051		S_Shore	----	5.01695e-126	-+++	1	0	0	0
cg14825413	8	144358566	GLI4	Island	++++	8.59111e-126	-++-	1	0	0	0
cg14576824	1	213224402	RPS6KC1;RPS6KC1	N_Shore	----	1.24604e-125	+++-	1	0	1	1
cg05072008	7	50518647	FIGNL1;FIGNL1	Island	----	1.47229e-125	-+-+	1	1	0	1
cg23324888	5	111093475	C5orf13;C5orf13;C5orf13;C5orf13;C5orf13;C5orf13;C5orf13;C5orf13;C5orf13;C5orf13	Island	----	3.86928e-125	+-+-	1	0	0	1
cg06073695	6	89843846			++++	4.68904e-125	-+++	1	0	0	0
cg18059891	19	36499721	C19orf46	N_Shore	----	5.54159e-125	---+	1	0	0	1
cg06868100	7	29606349	PRR15	S_Shore	++++	1.24276e-124	-+++	1	0	1	0
cg22631938	3	71802420	EIF4E3;EIF4E3;GPR27	N_Shore	----	1.62313e-124	---+	1	0	0	1
cg23332732	12	26986274	ITPR2	Island	----	3.04952e-124	+++-	1	0	0	1
cg24418853	10	17659399	PTPLA	Island	----	4.55788e-124	+++-	1	0	0	0
cg22303909	7	50518439	FIGNL1;FIGNL1	Island	----	5.01695e-124	-++-	1	0	0	1
cg18735956	6	34113908		Island	----	5.73834e-124	+++-	0.0218024	0	0	0
cg23973272	8	52322169	PXDNL	Island	----	8.00088e-124	++++	1	0	0	1
cg26078439	8	145721896	PPP1R16A	N_Shelf	++++	1.06897e-123	--++	1	0	0	0
cg25453677	17	1835735		N_Shore	----	1.07881e-123	+++-	1	0	1	1
cg22874695	8	42397328	C8orf40;C8orf40;C8orf40;C8orf40;C8orf40;SLC20A2	S_Shore	++++	1.09848e-123	++--	1	0	0	1
cg02557933	2	220351040	SPEG	S_Shore	----	1.23292e-123	+---	2.79506e-06	0	0	1
cg16894439	1	228634806		S_Shore	----	1.30834e-123	++-+	5.8072e-16	0	0	1
cg11050859	8	60031823	TOX	Island	----	1.90513e-123	++-+	1	0	0	1
cg25653641	6	28601312		N_Shore	----	3.20363e-123	-+++	1	0	0	0
cg07204479	12	89915527	WDR51B;GALNT4;GALNT4	N_Shelf	++++	3.73812e-123	----	0.128736	0	1	0
cg23404877	2	85553759	TGOLN2	N_Shore	++++	4.91857e-123	----	0.583015	0	0	0
cg10601026	10	64579140	EGR2	S_Shore	----	2.00678e-122	++++	0.156247	0	0	1
cg18063486	4	1512966		N_Shore	++++	4.4923e-122	+--+	1	0	0	1
cg22591384	19	58869004	ZNF497	S_Shore	----	6.59089e-122	-+++	1	0	0	1
cg23146346	6	17282859	RBM24;RBM24;RBM24	S_Shore	----	8.88623e-122	---+	1	0	0	0
cg06346081	1	42921584	PPCS;ZMYND12;ZMYND12;PPCS;ZMYND12	N_Shore	----	1.90513e-121	++++	1	0	0	1
cg24858738	6	13711938	RANBP9	Island	----	1.95759e-121	+++-	1	0	0	0
cg15620114	10	91296457	SLC16A12	S_Shore	----	2.02973e-121	++-+	1	0	0	1
cg15078122	19	50969551	MYBPC2		----	2.60684e-121	++++	1	1	1	1
cg10837783	1	32741454	LCK;LCK	Island	----	2.98066e-121	++++	1	0	0	0
cg03731078	7	50518350	FIGNL1;FIGNL1	Island	----	3.37742e-121	+++-	1	1	0	1
cg23050227	8	112241152			++++	3.83649e-121	---+	1	0	0	0
cg06283493	3	181417613	SOX2OT	S_Shelf	----	1.17718e-120	++-+	1	0	0	1
cg19529472	8	143534954		N_Shore	----	2.04941e-120	++++	1	1	0	1
cg15482893	1	32837667	BSDC1;BSDC1;BSDC1;BSDC1		++++	3.34463e-120	----	1	0	0	0
cg02156380	1	180882591	KIAA1614	Island	----	4.68904e-120	-+++	1	0	0	0
cg13876135	1	211872318			----	4.98416e-120	----	0.0618429	0	0	1
cg14563637	9	98931801			----	1.13127e-119	+---	1	0	0	1
cg13349472	2	25427451		Island	----	1.85266e-119	--+-	1	0	0	1
cg23111338	7	50518573	FIGNL1;FIGNL1	Island	----	2.25599e-119	-+++	1	1	0	1
cg00618291	1	2234291	SKI	N_Shore	++++	2.7085e-119	++++	1	0	0	1
cg04774597	15	69744390	RPLP1;RPLP1	N_Shore	----	2.84294e-119	++++	1	0	0	0
cg19367436	6	75953935	COX7A2;COX7A2		----	2.95442e-119	-+++	1	0	0	1
cg20848441	1	2805150			++++	3.0364e-119	+++-	1	0	0	0
cg19817652	17	36997420	C17orf98	N_Shore	----	3.31184e-119	++++	1	0	0	1
cg15414745	6	74064047	DPPA5	Island	----	5.01695e-119	-++-	1	0	0	1
cg06279274	10	124635805	FAM24B	N_Shelf	++++	8.26321e-119	--++	1	0	0	1
cg13159946	20	30073521	NCRNA00028	S_Shore	----	8.95181e-119	++++	0.733196	0	1	1
cg12474798	10	64565772	ADO;ADO	Island	++++	9.24692e-119	----	1	0	0	0
cg04725166	1	7887271	PER3	Island	----	1.27227e-118	++++	1	0	0	1
cg07217350	5	162934022	MAT2B;MAT2B	S_Shore	++++	1.28211e-118	--+-	1	1	0	0
cg02491754	12	53773040	SP1;SP1	N_Shore	----	2.2691e-118	++--	1	0	0	0
cg02400092	11	130185384	ZBTB44	S_Shore	----	3.70533e-118	++--	1	0	0	0
cg04963967	7	139167427	KLRG2	N_Shore	----	4.85299e-118	++++	1	0	1	0
cg14205016	11	8290476		S_Shore	----	5.04974e-118	++++	1	0	1	0
ch.8.76350685F	8	76188130			----	5.63997e-118	+---	1	0	0	1
cg12130768	17	9550545	USP43	S_Shore	----	6.36136e-118	-+-+	1	0	0	1
cg22572476	6	28601324		N_Shore	----	7.04996e-118	-+++	1	0	0	0
cg19247726	1	228565914	OBSCN	N_Shore	----	9.6732e-118	----	1	1	0	0
cg02131230	8	10283275	MSRA;MSRA;MSRA		----	1.35753e-117	----	0.0157362	0	0	0
cg17631390	15	42174823	SPTBN5	Island	----	1.36736e-117	--+-	1	0	0	1
cg24117274	1	21945805	RAP1GAP;RAP1GAP;RAP1GAP	N_Shelf	----	1.5018e-117	-++-	1	0	1	0
cg23771366	11	86510998	PRSS23	N_Shore	----	2.37731e-117	-+++	1	0	0	0
cg26250093	2	24397649	C2orf84	Island	----	3.443e-117	++++	1	1	0	1
cg06070970	8	144359074	GLI4	Island	++++	3.96765e-117	----	1	0	0	0
cg02717339	2	97524767	ANKRD39	S_Shore	----	4.32835e-117	--+-	1	0	1	0
cg15624813	10	23492866			----	4.68904e-117	+++-	1	0	1	1
cg22953865	14	99988654	CCDC85C		----	6.09903e-117	----	1	0	0	0
cg07052513	2	86668451	KDM3A;KDM3A;KDM3A	Island	----	1.08209e-116	+-+-	1	0	0	1
cg03446244	16	86229872			----	1.13783e-116	++++	1	0	1	1
cg16567087	15	85114409	UBE2QP1	S_Shore	++++	1.2985e-116	+--+	1	0	0	1
cg00936626	3	196694856	PIGZ	N_Shore	----	1.47557e-116	-+-+	1	0	0	1
cg23811540	1	11741690	MAD2L2;MAD2L2	Island	----	1.89529e-116	+++-	1	0	0	0
cg13561855	14	52735840	PTGDR	S_Shore	----	2.50847e-116	-+--	1	0	0	1
cg01672129	14	103011800		S_Shore	----	5.41043e-116	++++	0.156542	0	0	1
cg16615454	12	50475167	ACCN2;ACCN2	Island	----	6.45973e-116	-+++	1	0	0	1
cg07858728	10	124319791	DMBT1;DMBT1;DMBT1		++++	7.6074e-116	-+--	1	0	0	0
cg09242610	2	9357556	ASAP2;ASAP2		++++	7.6074e-116	+--+	1	0	0	0
cg20292636	1	204328377	PLEKHA6		----	9.05018e-116	+---	1	1	0	0
cg06168204	6	27570548			++++	1.97399e-115	++++	1	0	0	0
cg20084219	17	36997449	C17orf98	Island	----	2.25271e-115	++++	1	0	0	0
cg23801021	11	72353434	PDE2A;PDE2A;PDE2A;PDE2A;PDE2A	Island	----	2.29861e-115	+++-	1	0	0	0
cg03594515	3	129346178		Island	----	3.50858e-115	-+-+	1	0	0	0
cg03233793	19	19626605	NDUFA13;TSSK6	Island	----	4.32835e-115	++++	1	0	1	1
cg17328665	1	7887199	PER3	Island	----	5.14811e-115	-+-+	1	0	0	1
cg18532215	3	145879568	PLOD2;PLOD2	S_Shore	----	6.75484e-115	----	1	0	0	0
cg16143502	6	74104801	DDX43	Island	----	7.14833e-115	-+++	1	0	0	0
cg23056729	10	7453594	SFMBT2	Island	----	7.31228e-115	+++-	1	0	0	0
cg15373950	12	99039295	APAF1;APAF1;APAF1;APAF1;IKBIP;APAF1;APAF1;IKBIP;APAF1;APAF1;IKBIP;APAF1;APAF1	Island	----	8.91902e-115	+++-	1	0	0	1
cg24790788	3	145879626	PLOD2;PLOD2	S_Shore	----	1.19357e-114	---+	1	1	0	1
cg02845890	8	67783229	C8orf45;C8orf45;C8orf45		----	1.62641e-114	++++	1	0	0	0
cg20684110	10	64565750	ADO;ADO	Island	++++	2.16417e-114	--+-	1	0	0	0
cg21386414	1	26421349			----	2.35436e-114	----	0.0113029	0	0	1
cg18810310	14	103691834			----	2.44289e-114	+-++	1	1	0	1
cg26348487	19	2488560		Island	----	3.41021e-114	++++	0.0685649	0	0	0
cg25943719	15	101421391	ALDH1A3	S_Shore	----	5.41043e-114	-+-+	1	0	1	0
cg06866616	1	2455264	PANK4	N_Shore	----	7.6074e-114	++++	0.0493169	0	0	0
cg18182566	14	105888161	MTA1		++++	8.49274e-114	--+-	1	0	1	0
cg00982521	6	41374806		Island	----	9.24692e-114	----	1	0	1	0
cg19477346	19	48699872		S_Shore	----	1.01651e-113	-+++	1	0	0	0
cg21378403	10	102777924	PDZD7	N_Shore	----	1.01651e-113	---+	1	1	1	1
cg14520511	7	91875046	KRIT1;KRIT1;KRIT1;KRIT1;ANKIB1;KRIT1;KRIT1;KRIT1	Island	----	1.11816e-113	+++-	1	0	1	1
cg01805480	12	133137879	FBRSL1	S_Shore	----	1.2985e-113	++++	1	0	0	1
cg05468028	21	30391383	RWDD2B	Island	----	1.37064e-113	-++-	1	0	0	1
cg01892997	6	146864209	RAB32	N_Shore	++++	1.46574e-113	--+-	1	0	0	1
cg16449012	4	17781880	FAM184B	N_Shore	----	1.99694e-113	+--+	1	0	0	1
cg02802029	3	145879686	PLOD2;PLOD2	S_Shore	----	2.49536e-113	---+	1	1	0	1
cg15141371	3	39195098	CSRNP1;CSRNP1	Island	----	3.67254e-113	+++-	1	0	0	1
cg01996116	3	42846907	HIGD1A;HIGD1A;HIGD1A	S_Shore	----	6.42694e-113	-++-	1	0	1	1
cg04428700	7	27239556	HOXA13	Island	----	6.62368e-113	+++-	1	0	0	0
cg10600889	17	37123767	FBXO47		----	1.34113e-112	-+-+	1	0	1	1
cg07942040	19	19650766	CILP2	Island	----	2.20352e-112	++++	1	0	0	1
cg14510926	2	174877357		N_Shore	----	2.53798e-112	++++	1	0	0	1
cg00099295	3	12597720	MKRN2	N_Shore	----	3.18396e-112	++-+	1	0	0	1
cg14301190	16	31159704	PRSS36	Island	----	3.41021e-112	-+++	0.780414	0	0	1
cg24437523	1	160085568	ATP1A2;ATP1A2		----	3.54137e-112	++++	1	0	0	1
cg10557828	3	145879642	PLOD2;PLOD2	S_Shore	----	6.85321e-112	-+--	1	0	0	1
cg06809298	6	75953853	COX7A2;COX7A2		----	1.02634e-111	---+	1	0	0	1
cg06708213	17	74864041	MGAT5B	N_Shore	----	1.12799e-111	---+	1	1	1	1
cg10668414	20	34895979		S_Shore	----	1.29522e-111	++++	1	0	1	1
cg24717799	15	83680832	C15orf40;C15orf40;C15orf40;C15orf40;C15orf40;C15orf40;C15orf40	S_Shore	----	1.31818e-111	-+++	1	0	0	1
cg08926642	1	7887455	PER3	Island	----	1.82971e-111	-+++	1	0	0	1
cg22622057	1	182053203			----	2.01006e-111	---+	1	0	0	0
cg23694533	17	40806193		S_Shore	----	2.68882e-111	-++-	1	0	0	1
cg19251864	19	36120042	RBM42;RBM42	Island	----	2.74456e-111	+++-	1	0	0	1
cg14596623	2	175351897	GPR155;GPR155	Island	----	3.70533e-111	+++-	1	0	0	1
cg23586959	20	30073209	NCRNA00028	S_Shore	----	4.22997e-111	-+-+	1	0	0	1
cg25985959	6	106430134		S_Shore	----	6.36136e-111	++-+	1	0	1	0
cg25449950	4	24797174	SOD3;SOD3	N_Shelf	----	7.86972e-111	----	1	0	0	0
cg09012594	10	21464258	NEBL	S_Shore	----	8.52553e-111	-+-+	1	0	0	1
cg11707067	19	59073430	MZF1;MZF1;LOC100131691	Island	----	1.35097e-110	++++	1	0	0	1
cg07348481	11	61355119		Island	----	3.90207e-110	++++	0.0227927	0	0	1
cg07457305	2	71118292		S_Shore	----	4.75462e-110	+++-	1	0	0	1
cg19227924	17	28565709		S_Shelf	----	4.75462e-110	-+++	1	0	0	1
cg19318450	21	34852305	TMEM50B	Island	----	5.31206e-110	+++-	1	0	0	0
cg05123976	17	45949677		Island	----	5.34485e-110	-+++	1	1	0	1
cg21419585	1	118166117	FAM46C		----	5.54159e-110	----	1	0	0	0
cg01787285	1	2162682	SKI	S_Shore	----	5.57438e-110	+---	1	0	0	0
cg21667367	2	172974217		S_Shore	----	8.42716e-110	-+++	1	1	0	1
cg26471497	2	172974819		S_Shore	----	9.44366e-110	-++-	1	0	0	0
cg24360241	2	233370823		S_Shelf	----	1.11816e-109	++++	0.595475	0	0	1
cg15069551	20	25128695	LOC284798;LOC284798;LOC284798	N_Shore	----	1.27883e-109	++++	1	1	1	1
cg04920032	12	50262986	FAIM2		----	1.64608e-109	+--+	1	0	0	0
cg00442109	10	23492798			----	2.24615e-109	++++	1	0	0	1
cg09174870	16	56702802	MT1G;MT1H	N_Shore	----	3.24954e-109	-+-+	1	0	1	0
cg01240931	5	112074043	APC;APC;APC		++++	3.34463e-109	++++	0.711882	0	0	0
cg22997177	12	54070527	ATP5G2;ATP5G2	N_Shore	----	4.55788e-109	--+-	1	0	0	0
cg06711380	17	37123949	FBXO47		----	5.41043e-109	-+++	0.0140376	0	1	1
cg03342928	19	56002446	SSC5D	Island	----	5.90229e-109	++--	1	0	0	1
cg03993926	11	105948416	KBTBD3;KBTBD3;AASDHPPT;KBTBD3;KBTBD3;AASDHPPT	Island	----	7.64019e-109	+++-	1	0	0	0
cg04843085	11	128776548	C11orf45;KCNJ5		++++	7.96809e-109	-+-+	1	0	0	0
cg05989533	6	28710579			----	1.20341e-108	++++	1	0	0	1
cg03168896	3	44036098		N_Shore	----	3.22986e-108	+-++	1	0	0	1
cg27164797	6	57038231	BAG2	S_Shore	----	3.24626e-108	-++-	1	0	0	0
cg08951638	5	141706213		S_Shore	----	3.60695e-108	-+-+	1	0	0	1
cg22979368	2	217501581	IGFBP2	S_Shelf	----	3.60695e-108	+--+	1	0	0	0
cg24099023	17	56770189	TEX14;RAD51C;TEX14;RAD51C	Island	----	3.63975e-108	+++-	1	0	0	0
cg25987564	4	6010075		Island	++++	3.70533e-108	++++	1	0	0	1
cg18758664	15	90320475	MESP2	Island	----	4.1316e-108	++++	0.30951	0	0	1
cg25571880	2	233384489		N_Shelf	----	6.29578e-108	+---	0.370533	0	0	0
cg14884160	7	89840396	STEAP2;STEAP2	N_Shore	----	6.29578e-108	++++	1	0	0	0
cg21411366	4	24797176	SOD3;SOD3	N_Shelf	----	6.62368e-108	+---	1	0	0	0
cg14478475	9	37905113	MCART1;MCART1;MCART1	S_Shore	----	6.68926e-108	-+--	1	0	0	1
cg26385222	7	150497077	TMEM176B;TMEM176B;TMEM176A;TMEM176B;TMEM176B;TMEM176B	Island	----	6.82042e-108	++-+	1	0	0	0
cg17590162	11	63827361	MACROD1		----	8.55832e-108	-+++	1.82446e-13	0	0	1
cg11669516	2	217501092	IGFBP2	S_Shelf	----	1.07225e-107	+-++	1	0	0	0
cg25257677	8	22223985	SLC39A14;SLC39A14;SLC39A14;SLC39A14	N_Shore	----	1.12799e-107	+++-	1	0	1	1
cg09556700	1	2230668	SKI	N_Shore	----	1.76085e-107	-+-+	1	0	0	0
cg11174640	6	27259237		S_Shore	----	1.79692e-107	++++	1	0	0	1
cg05852786	13	111466326		S_Shore	----	2.31501e-107	++++	1	0	0	1
cg01825213	9	98979965		N_Shore	----	2.41666e-107	---+	1	0	0	0
cg14374521	10	124638874	FAM24B;LOC399815	Island	----	2.71505e-107	++++	1	0	0	0
cg15645685	19	19730175	PBX4	S_Shore	----	2.82654e-107	++++	1	0	0	0
cg15416643	8	24815840		S_Shore	----	3.08887e-107	-++-	1	0	0	0
cg12080906	1	156646065	NES	N_Shore	----	5.14811e-107	----	1	0	0	0
cg13693646	9	68410538		N_Shore	----	8.95181e-107	+--+	1	0	0	1
cg00760562	3	195942993	OSTalpha		----	9.05018e-107	----	1	0	0	0
cg10219223	1	6420713	ACOT7;ACOT7;ACOT7;ACOT7		----	1.7379e-106	+---	4.37753e-11	0	0	0
cg14129430	1	2387934		Island	++++	3.10198e-106	--+-	1	0	0	0
cg14399930	17	37123669	FBXO47		----	4.36114e-106	++++	0.553504	0	0	1
cg23579062	9	34457500	C9orf25;DNAI1	Island	----	5.21369e-106	--+-	1	0	0	1
cg03792653	20	36661448	RPRD1B;KIAA0406	N_Shore	----	7.86972e-106	---+	1	0	0	1
cg01854076	4	2063036	NAT8L	Island	----	1.1903e-105	+-++	1	0	0	1
cg20385686	1	27024451	ARID1A;ARID1A	S_Shore	----	1.49525e-105	+-+-	1	0	0	0
cg27031448	13	27998168	GTF3A	N_Shore	----	2.01989e-105	+++-	1	0	0	1
cg05358404	20	62288950	RTEL1;RTEL1	Island	----	2.37731e-105	+-++	1	0	0	0
cg21400170	17	78977614		Island	++++	2.84294e-105	--+-	0.382665	0	0	0
cg10972127	6	107967104	SOBP		++++	3.8037e-105	--++	1	0	0	0
cg11216554	10	124638983	LOC399815;FAM24B	Island	----	5.31206e-105	-+++	1	0	0	0
cg24977886	22	42470101	FAM109B	Island	----	5.96787e-105	-+++	1	0	0	0
cg12049992	18	11147785	FAM38B	N_Shore	----	6.06624e-105	-+++	2.18909e-22	0	1	1
cg12273319	19	50861262		Island	++++	6.2302e-105	----	1	0	0	1
cg14125707	9	129436137	LMX1B	S_Shelf	----	8.75506e-105	+---	1	0	0	0
cg09961397	6	70991205	COL9A1;COL9A1	N_Shore	----	1.04602e-104	+---	1	0	0	1
cg03870261	19	2428514	LMNB2;TIMM13	Island	----	1.17718e-104	+-++	1	0	0	1
cg00067824	10	23492914			----	1.68215e-104	+++-	1	0	1	0
cg10424846	17	33894970		Island	----	1.84611e-104	+++-	1	0	0	1
cg06823108	18	59221320	CDH20	N_Shore	----	2.64291e-104	++++	1	0	0	1
cg20020844	17	45929963	SP6	S_Shore	----	2.9577e-104	+++-	1	0	0	1
cg03719070	2	74668976	RTKN;RTKN;RTKN;RTKN	Island	----	2.98394e-104	-+++	1	0	0	1
cg18098722	11	556889	C11orf35	S_Shore	----	3.93486e-104	-++-	1	0	0	1
cg01440864	17	44892087	WNT3	N_Shelf	----	4.16439e-104	----	1	0	0	0
cg21195491	9	135753121	C9orf98;C9orf9	N_Shore	----	4.98416e-104	+---	1	1	0	1
cg01904727	5	145484705	PLAC8L1		----	6.59089e-104	----	1	1	0	1
cg20787146	11	75142449	KLHL35	S_Shore	----	8.72227e-104	-++-	1	0	1	0
cg04328703	14	104603559	KIF26A	Island	----	8.78785e-104	++--	1	0	0	1
cg04487479	6	70993328	COL9A1;COL9A1	S_Shore	----	8.82064e-104	-+++	1	0	0	0
cg20769926	6	166419012		N_Shelf	----	1.16734e-103	++++	0.583343	0	0	1
cg14887613	19	345454	MIER2	Island	----	3.01673e-103	++++	0.270194	0	0	1
cg17178468	17	43049442		S_Shore	----	3.47579e-103	++--	1	0	0	0
cg17127823	8	71520941	TRAM1	S_Shore	----	3.57416e-103	--+-	1	0	0	1
cg00055529	17	37123835	FBXO47		----	7.01717e-103	-+-+	1	0	0	0
cg18043888	11	66839187	RHOD	Island	----	7.73856e-103	-+++	0.0100568	0	0	1
cg00642615	15	69590937	PAQR5	N_Shore	----	1.08864e-102	+-+-	1	0	0	0
cg17397004	22	38863644	KDELR3;KDELR3	N_Shore	----	1.34113e-102	--+-	1	0	1	1
cg14540387	15	52404232	BCL2L10	Island	----	2.59045e-102	++-+	1	0	1	1
cg11218091	10	124638976	LOC399815;FAM24B	Island	----	2.72489e-102	++++	1	0	0	0
cg01487683	6	5031084			----	4.32835e-102	++++	1	0	0	0
cg13713218	9	100000033	KIAA1529	N_Shore	----	4.68904e-102	--+-	1	0	0	0
cg20490126	1	25870007	LDLRAP1	Island	----	5.08253e-102	+++-	1	0	0	1
cg22361859	17	37123638	FBXO47;FBXO47		----	5.24648e-102	++++	0.041939	0	1	1
cg13695585	6	30853014	DDR1;DDR1	S_Shore	----	1.1116e-101	-+--	1	0	0	0
cg20671649	1	3309864	PRDM16;PRDM16	N_Shore	----	1.13783e-101	++++	1	0	0	0
cg05576949	3	185540331	IGF2BP2;IGF2BP2	N_Shore	++++	1.61657e-101	---+	1	0	0	0
cg15799267	17	7942406	ALOX15B;ALOX15B;ALOX15B;ALOX15B;ALOX15B;ALOX15B		----	1.65592e-101	-+--	1	0	0	0
cg15681462	19	55880286	IL11	N_Shore	----	2.43633e-101	++-+	1	0	1	1
cg07167185	1	24120017	LYPLA2	S_Shelf	++++	3.41021e-101	-+++	0.000721719	0	0	0
cg15233611	12	122244660	SETD1B	S_Shore	++++	3.8037e-101	----	1	0	1	0
cg13822256	8	24811266	NEFL	N_Shore	----	8.91902e-101	+++-	1	0	0	1
cg00091064	6	41376604		Island	----	1.0493e-100	+-+-	1	0	1	1
cg08474334	1	156816117	NTRK1;INSRR	S_Shore	----	1.07225e-100	++++	1	0	1	1
cg24566261	6	30854164	DDR1;DDR1	S_Shore	----	1.08864e-100	++++	1	0	1	0
cg08132302	19	55684640	SYT5	N_Shore	----	1.30834e-100	+---	1	0	0	0
cg03759229	6	28601417		N_Shore	----	1.56083e-100	++++	0.014759	0	0	0
cg12440062	6	49681391	CRISP2;CRISP2;CRISP2;CRISP2;CRISP2		----	1.77397e-100	++++	1	0	0	1
cg04362853	19	56151707	ZNF580	Island	++++	2.1445e-100	++++	0.595148	0	0	0
cg14602164	4	175205422	KIAA1712;KIAA1712;FBXO8	S_Shore	----	2.59701e-100	-+++	1	0	0	1
cg03127898	11	62455098	LRRN4CL	Island	----	2.74129e-100	-+++	0.169035	0	0	1
cg16530382	17	37123671	FBXO47		----	3.443e-100	-+++	1	0	1	1
cg08804207	17	20812157		Island	----	3.70533e-100	-+++	1	0	0	0
cg05548469	4	122853464	TRPC3;TRPC3	N_Shore	----	4.32835e-100	++++	1	0	0	0
cg07208667	8	41425365		S_Shore	----	5.47601e-100	++++	1	0	1	0
cg22743002	6	34123215		S_Shore	----	7.34507e-100	++++	0.0204022	0	0	0
cg15078284	19	36004994	DMKN;DMKN;DMKN;DMKN		----	8.88623e-100	----	0.174052	0	0	0
cg16945633	12	133170342		S_Shore	++++	9.73878e-100	-+++	1	0	0	1
cg14103670	16	33939081		Island	----	1.3772e-99	++-+	0.00452837	0	0	0
cg16731266	6	28601269		N_Shore	----	1.5346e-99	-+++	0.108405	0	0	1
cg13250884	3	8543204	LMCD1	Island	----	1.72806e-99	++++	1	0	0	0
cg27131955	14	52736038	PTGDR	S_Shore	----	1.80348e-99	----	1	0	1	1
cg19100596	1	32170361	COL16A1	S_Shore	----	1.92808e-99	---+	1	0	0	0
cg04986555	1	55446708	TMEM61;TMEM61	Island	----	1.99038e-99	++++	0.0367582	0	0	1
cg24307499	19	55494075	NLRP2	Island	----	2.05924e-99	--+-	1	0	0	0
cg05373875	20	18485171		Island	----	2.25271e-99	-+-+	1	0	0	0
cg15620905	1	44024150	PTPRF;PTPRF		----	2.4101e-99	--+-	1	0	0	1
cg14731570	2	231917214		N_Shore	----	2.59045e-99	++-+	1	0	0	1
cg07957491	9	134407190	UCK1;UCK1	S_Shore	----	2.62652e-99	----	1	0	0	0
cg25930673	12	123319894	HIP1R	Island	----	2.74784e-99	+++-	1	0	0	0
cg03021802	8	21923841	EPB49;EPB49;EPB49;EPB49;EPB49;EPB49	Island	----	3.01345e-99	-+-+	1	1	0	1
cg21121843	4	3203982	HTT		----	5.11532e-99	+-+-	1	0	0	0
cg18685071	7	129143261		S_Shore	----	5.47601e-99	----	1	0	1	0
cg01810111	6	27637395			++++	6.29578e-99	++++	1	0	0	1
cg12763978	6	28601519		N_Shore	----	6.42694e-99	++++	1	0	0	1
cg04202338	3	12882335	RPL32;SNORA7A;RPL32;RPL32	N_Shore	++++	8.26321e-99	----	0.103061	0	0	0
cg14920044	10	91296311	SLC16A12	S_Shore	----	8.72227e-99	++-+	1	0	0	1
cg05398095	1	207224740	YOD1	N_Shore	++++	8.95181e-99	++--	1	0	1	1
cg09594291	19	58879022	ZNF837;ZNF837	Island	----	1.0329e-98	-+-+	1	0	0	1
cg01090161	6	34032747	GRM4		----	1.10832e-98	++++	1	0	1	0
cg14904725	13	113777045	F10		----	1.77725e-98	+---	9.02067e-05	0	1	0
cg21749424	6	166418799		N_Shelf	----	1.78708e-98	+++-	1	0	0	1
cg08639948	1	36591237		S_Shore	----	1.88217e-98	-+++	1	0	0	0
cg00177243	10	18434068	CACNB2;CACNB2;CACNB2;CACNB2;CACNB2;CACNB2	S_Shelf	++++	2.10187e-98	-+-+	1	0	0	0
cg16276982	15	29968032		S_Shore	----	2.33796e-98	+++-	1	0	0	0
cg27665769	4	2757761	TNIP2;TNIP2	Island	----	2.51503e-98	+-+-	1	0	0	0
cg22763739	20	34190196	FER1L4	Island	----	2.6921e-98	+---	1	0	0	1
cg18227944	13	20439201	ZMYM5;ZMYM5;ZMYM5	S_Shore	----	3.06591e-98	-++-	1	0	1	1
cg25125298	5	71853215			----	3.22659e-98	----	1	0	0	1
cg23983884	5	176900806	DBN1;DBN1		----	3.86928e-98	++++	0.382337	0	0	0
cg12673429	18	11150043	FAM38B	S_Shore	----	4.09881e-98	-+--	1	0	0	1
cg19603903	19	57742345	AURKC;AURKC;AURKC	Island	----	5.01695e-98	++++	1	0	0	1
cg17746791	6	37137740	PIM1	Island	----	5.31206e-98	+++-	1	0	0	0
cg16489360	7	129845574	TMEM209	S_Shore	----	5.70555e-98	---+	6.46629e-05	0	1	0
cg02904657	15	40571997		N_Shore	----	6.26299e-98	++-+	1	1	0	0
cg19694465	1	6267579	RNF207	N_Shore	----	6.45973e-98	++-+	1	0	0	1
cg04737881	4	183060943	MGC45800	N_Shore	----	6.82042e-98	+--+	1	0	0	1
cg01906695	12	48399493	COL2A1;COL2A1	S_Shore	----	6.98438e-98	-+--	1	0	0	1
cg01856384	6	41376904		Island	----	7.50902e-98	+---	1	0	1	1
cg25472530	5	23507617	PRDM9		----	7.6074e-98	-+++	1	0	0	1
cg10059324	1	7884824	PER3	N_Shelf	++++	9.01739e-98	----	1	1	0	1
cg08739828	18	33768144	MOCOS	Island	----	1.1903e-97	-+-+	1	1	0	1
cg06520846	1	42921582	PPCS;ZMYND12;ZMYND12;PPCS;ZMYND12	N_Shore	----	1.30834e-97	++++	0.801072	0	0	1
cg25629768	19	2428567	LMNB2;TIMM13	Island	----	1.31162e-97	++++	1	0	0	1
cg09168692	1	7887560	PER3	S_Shore	----	1.32474e-97	+-+-	1	0	0	1
cg24942922	3	120003547		N_Shore	----	1.33129e-97	-+++	1	0	0	1
cg27278519	12	81104111		S_Shore	----	1.40999e-97	++++	1	0	0	1
cg00433296	8	22223852	SLC39A14;SLC39A14;SLC39A14;SLC39A14	N_Shore	----	2.21664e-97	++++	1	0	1	1
cg00922727	6	109415123	C6orf182;SESN1	N_Shore	----	2.72161e-97	-++-	1	0	0	0
cg05192452	5	71852759			----	4.65625e-97	+++-	1	0	0	1
cg01667892	5	23507656	PRDM9		----	4.75462e-97	-+++	1	0	0	1
cg07747553	22	35935982	RASD2	Island	----	6.49252e-97	-+++	0.00184348	0	0	1
cg02150077	16	87098542			++++	6.98438e-97	----	1	0	1	0
cg26575633	1	156846336	NTRK1;NTRK1;NTRK1		----	9.57483e-97	++++	1	0	1	1
cg02393727	16	89690088	DPEP1;DPEP1		----	1.04602e-96	-+-+	1	0	0	0
cg17771569	19	1789618	ATP8B3	Island	++++	1.10504e-96	++-+	1	0	0	1
cg17115250	6	28557291		S_Shelf	++++	1.35425e-96	++++	1	0	0	0
cg15344914	12	54567476			----	1.39688e-96	+++-	1	1	0	1
cg09388215	17	64188148	CCDC46	Island	----	1.73462e-96	++++	0.719751	0	0	1
cg19837938	5	23507458	PRDM9		----	1.93136e-96	+-++	1	0	0	1
cg23951474	11	2188061	TH;TH;TH	Island	----	2.00022e-96	-++-	1	0	0	0
cg27362048	11	116661237	APOA5;APOA5	Island	----	2.07236e-96	+-++	1	0	0	1
cg06949812	17	38517993	GJD3;GJD3	N_Shore	----	2.15761e-96	--+-	1	0	0	0
cg10867349	14	88793741	KCNK10	S_Shore	----	2.19696e-96	-+-+	1	0	0	1
cg15035382	19	40728255	CNTD2	Island	++++	2.21336e-96	-+++	1	0	0	1
cg02571470	2	73294845	SFXN5	N_Shelf	++++	2.58389e-96	-+-+	1	0	0	0
cg04981056	3	195943444	OSTalpha;OSTalpha		----	2.83638e-96	+++-	1	0	1	1
cg16917406	15	85114159	UBE2QP1	Island	++++	2.90852e-96	--+-	1	0	0	0
cg06889979	6	29987491	NCRNA00171		++++	3.63975e-96	--++	1	0	0	0
cg00202460	15	83680873	C15orf40;C15orf40;C15orf40;C15orf40;C15orf40;C15orf40;C15orf40	S_Shore	----	4.22997e-96	-+++	1	0	0	0
cg08541880	3	137833983	DZIP1L	Island	----	4.65625e-96	+++-	1	0	0	1
cg04589210	2	86038589		Island	----	4.68904e-96	----	1	0	0	1
cg23413506	20	3218579	SLC4A11	Island	----	5.27927e-96	+-++	1	0	0	0
cg07011961	5	23507594	PRDM9		----	5.37764e-96	--++	1	0	0	1
cg02444433	5	23507469	PRDM9		----	6.75484e-96	+-++	1	0	0	1
cg13316977	19	12865609	BEST2	Island	----	6.82042e-96	-++-	1	0	0	1
cg17121140	13	111719003		N_Shore	----	6.886e-96	+++-	1	0	0	0
cg26576890	6	41374939		Island	----	7.04996e-96	+++-	1	0	0	0
cg24510518	8	144358898	GLI4	Island	++++	8.49274e-96	+++-	1	0	0	0
cg12515485	12	133185630		N_Shore	----	1.16406e-95	--+-	1	0	0	0
cg12165772	17	48070354	DLX3	N_Shore	----	1.17718e-95	-+--	1	0	0	1
cg26783727	16	67204807		S_Shore	----	1.19357e-95	-+-+	0.0520385	0	0	0
cg21846177	20	30073576	NCRNA00028	S_Shore	----	1.82315e-95	+++-	1	0	0	1
cg14625636	9	100000026	KIAA1529	N_Shore	----	1.94448e-95	----	1	0	0	0
cg03027739	7	127805680		N_Shore	----	2.2232e-95	+-+-	1	1	1	0
cg15410835	8	143125637			----	2.41338e-95	++-+	1	0	1	0
cg04212239	3	160119314	SMC4;SMC4	S_Shore	++++	2.44945e-95	++--	1	0	0	0
cg03237316	4	1567939		N_Shore	++++	2.50847e-95	+--+	1	0	0	0
cg24076348	10	132887718			----	3.17084e-95	+---	1	0	0	0
cg20113012	17	71308660	CDC42EP4	Island	----	3.54137e-95	++++	0.443655	0	0	0
cg02287371	5	1246274	SLC6A18	Island	++++	4.1316e-95	-+++	1	0	0	1
cg08269911	13	25875327	NUPL1;NUPL1	Island	----	7.08275e-95	-+++	1	0	0	1
cg05593775	10	102778743	PDZD7	Island	----	7.18112e-95	-+++	1	0	0	0
cg18927077	14	103605358		Island	----	1.32146e-94	-+++	1	0	0	1
cg18315060	6	41374532		Island	----	1.42311e-94	+---	1	0	0	0
cg01027976	22	42734612		Island	----	1.5805e-94	+-++	1	0	0	1
cg05523017	3	54158728	CACNA2D3	S_Shore	----	1.60673e-94	+--+	1	0	0	1
cg07389205	17	1227609		Island	++++	2.08548e-94	++++	1	0	0	1
cg10143507	2	118943004		N_Shore	----	2.09203e-94	-+--	1	0	0	1
cg14997592	6	49681178	CRISP2;CRISP2;CRISP2;CRISP2;CRISP2		----	2.11827e-94	-+++	1	0	0	0
cg11342453	6	26196699		N_Shore	++++	2.19368e-94	--++	1	0	1	0
cg08767627	4	164252263	NPY1R	N_Shore	----	2.7544e-94	++-+	1	0	1	0
cg25607643	15	40730161		S_Shore	----	3.70533e-94	-+--	1	0	1	1
cg14514226	1	205197651	TMCC2	Island	----	5.37764e-94	---+	1	0	0	0
cg08311797	6	27197103			++++	5.63997e-94	----	1	0	0	0
cg16616022	6	57086293	RAB23;RAB23	N_Shore	----	6.39415e-94	--+-	1	0	1	1
cg08139206	14	103748318		S_Shelf	----	6.82042e-94	+---	1	0	0	1
cg19526166	5	110062729	TMEM232		----	7.01717e-94	++++	1	0	0	0
cg06595595	18	11751352	GNAL;GNAL;GNAL	Island	----	8.16483e-94	++++	0.0271473	0	0	1
cg25103895	10	64565642	ADO;ADO	Island	++++	8.78785e-94	----	0.0284949	0	0	0
cg05528623	1	2387670		Island	++++	1.01978e-93	+-++	1	0	1	0
cg09230763	1	27683351	MAP3K6	Island	----	1.0493e-93	++++	1	0	0	0
cg15089111	14	34270113	NPAS3;NPAS3;NPAS3;NPAS3	Island	----	1.0952e-93	-+++	0.000172216	0	0	0
cg22986999	11	68781976	MRGPRF;MRGPRF	S_Shelf	----	1.20997e-93	+---	1	0	0	0
cg02211983	1	152086879	TCHH	S_Shore	----	1.45918e-93	---+	1	0	0	1
cg27117491	2	39186743	LOC375196;LOC100271715	N_Shore	----	1.55099e-93	++--	1	0	0	1
cg09057517	6	27570490			++++	1.86578e-93	++++	0.0311608	0	0	1
cg03634479	10	18430412	CACNB2;CACNB2;CACNB2;CACNB2;CACNB2;CACNB2	S_Shore	++++	2.02645e-93	-+--	0.343317	0	0	0
cg06329022	17	26926511	SPAG5	Island	----	2.48552e-93	--+-	1	0	1	1
cg06633543	14	100151561	CYP46A1	S_Shore	----	2.89868e-93	-+--	1	0	0	0
cg19793809	5	132166663		Island	----	3.50858e-93	----	1	0	0	1
cg16875104	7	30635889	GARS	S_Shore	++++	4.29556e-93	---+	1	0	0	1
cg17037355	20	3218545	SLC4A11	N_Shore	----	4.88578e-93	-+++	1	0	1	1
cg26207408	2	203500527	FAM117B	Island	----	5.1809e-93	++++	1	0	0	1
cg17659920	19	36499666	C19orf46;C19orf46	N_Shore	----	5.34485e-93	+---	1	0	1	1
cg01342115	3	134031663		Island	----	5.44322e-93	++++	1	0	0	0
cg25947408	5	133451383	TCF7;TCF7;TCF7;TCF7;TCF7;TCF7;TCF7	S_Shore	----	7.57461e-93	-+++	1	0	0	0
cg08443038	16	89006877	CBFA2T3;CBFA2T3	Island	++++	7.70577e-93	++-+	0.00908953	0	0	0
cg21225804	9	132934214	FREQ	Island	----	8.49274e-93	++++	0.205301	0	0	0
cg17091577	6	30854233	DDR1;DDR1	S_Shore	----	9.64041e-93	-+++	1	0	1	1
cg14253670	8	24802149		S_Shelf	----	1.02634e-92	++++	1	0	0	1
cg18483404	10	124591732	CUZD1		++++	1.1903e-92	--+-	1	0	0	0
cg23965214	17	37123909	FBXO47		----	1.31162e-92	-+++	1	0	0	1
cg27057652	8	52322137	PXDNL	Island	----	1.33129e-92	++-+	1	0	0	1
cg22622886	1	9189641	GPR157	Island	----	1.38048e-92	+-+-	1	0	0	1
cg01750170	7	155595288		N_Shore	----	2.10515e-92	-+-+	1	0	0	1
cg13360404	7	129710309	KLHDC10	Island	----	2.14122e-92	----	1	0	0	1
cg25106913	6	27648354		S_Shore	++++	2.49208e-92	+-+-	1	0	0	0
cg01825831	3	42814880	CCDC13	Island	----	2.71833e-92	++++	1	0	0	1
cg06251978	1	159507078	OR10J5		++++	2.89212e-92	---+	1	0	0	0
cg06429214	5	110062417	TMEM232		----	3.11838e-92	+++-	1	0	0	0
cg02763617	5	64331196		N_Shore	----	3.34463e-92	----	0.0492513	0	0	0
cg23971868	6	70991283	COL9A1;COL9A1	N_Shore	----	4.55788e-92	++-+	1	0	0	1
cg15157791	20	2854198	PTPRA;PTPRA;PTPRA	Island	----	4.59067e-92	+++-	1	0	0	0
cg02288564	19	49934404	SLC17A7	Island	----	8.75506e-92	++++	1	0	0	1
cg17105139	2	74729279	LOC151534;LBX2	N_Shore	----	9.57483e-92	-+-+	1	0	0	1
cg09243648	17	45944464			----	1.25916e-91	+++-	1	0	1	0
cg03465891	6	45389953	RUNX2;RUNX2;RUNX2;RUNX2	Island	----	1.96415e-91	+++-	1	0	0	0
cg19474047	19	10207448	ANGPTL6	S_Shore	----	2.09203e-91	++++	1	0	0	0
cg15451853	4	1515692		S_Shore	++++	2.2855e-91	+--+	1	0	0	1
cg27093273	18	5892213	TMEM200C	S_Shore	----	2.55438e-91	-+-+	1	0	0	0
cg20785560	1	78511235	GIPC2	N_Shore	----	2.59701e-91	-+--	1	0	0	1
cg00873811	16	56654264		S_Shelf	----	2.77736e-91	++-+	1	0	0	1
cg22138735	20	62679713	SOX18	Island	++++	3.14461e-91	-+++	1.64543e-15	0	0	0
cg07539583	6	27215397	PRSS16	N_Shelf	----	3.57416e-91	++-+	1	0	0	0
cg21710255	6	49681742	CRISP2;CRISP2;CRISP2;CRISP2;CRISP2		----	3.67254e-91	----	1	0	0	0
cg06760077	2	119068497			----	4.29556e-91	-+++	9.24364e-07	0	0	1
cg03704673	17	4692287	GLTPD2;GLTPD2	Island	----	5.5088e-91	-++-	1	0	0	1
cg22635096	21	46550644	ADARB1;ADARB1;ADARB1;ADARB1;ADARB1;ADARB1;ADARB1	N_Shelf	++++	5.96787e-91	++++	0.770905	0	0	0
cg02389942	5	41869679	OXCT1	Island	----	6.09903e-91	--+-	1	0	0	1
cg05783384	2	218843735		Island	++++	6.88601e-91	+-+-	1	0	0	0
cg06732516	19	55667533	TNNI3	Island	++++	8.6239e-91	-++-	1	0	0	0
cg10503232	11	2891495	KCNQ1DN	S_Shore	----	1.75429e-90	++++	1	0	0	1
cg24126849	4	581937		N_Shore	++++	1.9248e-90	++++	1	0	0	1
cg04388919	7	149119133		N_Shore	----	2.0822e-90	+++-	1	0	0	1
cg08187845	17	1420199	LOC100306951;INPP5K;INPP5K;INPP5K	Island	----	2.68226e-90	+++-	1	0	0	0
cg06707970	20	59962861	CDH4	N_Shelf	++++	3.25282e-90	-+++	1	0	0	0
cg05079544	16	48644408	N4BP1	S_Shore	----	3.86928e-90	----	1	0	0	0
cg08660285	1	67390436	MIER1;MIER1;WDR78;MIER1;WDR78;MIER1;MIER1;MIER1;MIER1;MIER1	N_Shore	----	4.36114e-90	-+++	1	0	1	1
cg03954991	1	36916605	OSCP1;OSCP1	S_Shore	----	4.98416e-90	-+-+	1	0	1	0
cg23371413	19	57742394	AURKC;AURKC;AURKC;AURKC;AURKC	Island	----	6.62368e-90	++++	1	0	0	1
cg21399703	1	247681439		Island	----	8.75506e-90	++++	0.375779	0	0	1
cg26740942	17	37123711	FBXO47		----	9.77157e-90	++++	1	0	0	1
cg01293485	3	42847044	HIGD1A;HIGD1A;HIGD1A	S_Shore	----	1.02306e-89	-++-	1	0	1	1
cg15594585	1	227746882		N_Shore	----	1.06569e-89	++++	1	0	0	1
cg26103104	5	139490895		N_Shore	----	1.08537e-89	-++-	1	0	1	0
cg10738368	2	74729551	LBX2;LOC151534	Island	----	1.10504e-89	-+++	2.65964e-08	0	0	1
cg11885357	3	138152902	ESYT3	N_Shore	----	1.21981e-89	++++	1	0	0	1
cg19234738	3	134031551		N_Shore	----	1.36081e-89	++++	1	0	0	0
cg15467834	21	44574022		Island	++++	1.39032e-89	++++	1	0	0	1
cg06368300	17	43065840			----	1.48213e-89	++++	1	0	0	0
cg06221946	1	32802312	MARCKSL1	S_Shore	----	1.52476e-89	--+-	1	0	1	0
cg03738669	20	3218476	SLC4A11	N_Shore	----	1.96087e-89	----	1	0	1	0
cg17662083	19	36004632	DMKN;DMKN;DMKN;DMKN		----	2.06908e-89	--+-	0.00359056	0	1	1
cg02925601	6	27648605		S_Shore	++++	2.4888e-89	++++	1	0	0	0
cg17277845	12	58019807	B4GALNT1;SLC26A10	N_Shore	----	2.66587e-89	----	1	0	1	1
cg23279021	5	110062343	TMEM232;TMEM232		----	3.01345e-89	+++-	1	0	0	0
cg00003625	17	48912543	WFIKKN2		----	3.73812e-89	+-+-	1	0	0	1
cg17918558	1	46945595			----	4.45951e-89	++-+	1	0	0	0
cg02231404	20	62679635	SOX18	Island	++++	4.55788e-89	-+++	1	0	0	0
cg11065575	4	42403471	SHISA3	S_Shelf	----	4.78741e-89	-+++	1	0	0	0
cg00491927	3	120003642		N_Shore	----	5.11532e-89	-+++	1	0	0	1
cg19325791	17	46560683			++++	5.37764e-89	----	0.0447262	0	1	0
cg24514921	2	64246311	VPS54;VPS54	Island	----	5.57438e-89	+++-	1	0	0	1
cg02978784	6	28460106		S_Shelf	----	7.21391e-89	----	1	0	0	1
cg14951955	6	106773949	ATG5	S_Shore	----	8.85343e-89	++-+	1	0	0	1
cg22501922	19	7928773	EVI5L;EVI5L	S_Shore	----	1.00667e-88	++++	0.0180184	0	1	0
cg08350047	16	50278722		N_Shore	----	1.02306e-88	+---	1	0	0	1
cg08947181	1	40150278	HPCAL4	S_Shore	----	1.08209e-88	++-+	1	0	0	1
cg06098368	7	63386616		Island	++++	1.10504e-88	+---	1	0	0	0
cg00673006	2	97483133	CNNM3;CNNM3	Island	++++	1.20013e-88	--++	1	0	0	0
cg25619440	2	118616155		N_Shore	----	1.21981e-88	-+++	1	0	0	1
cg17248924	5	110062384	TMEM232		----	1.33457e-88	++++	1	0	0	0
cg10096378	22	40391617	FAM83F	S_Shore	----	1.56739e-88	++++	0.0168281	0	1	0
cg19176553	17	43049895		S_Shore	----	1.66904e-88	+-+-	1	0	0	0
cg11808633	12	6730599	LPAR5;LPAR5	S_Shore	----	1.96743e-88	+---	1	0	0	0
cg06634460	12	123380891	VPS37B	Island	++++	2.13794e-88	-++-	1	0	0	0
cg08483723	3	45267960	TMEM158	Island	----	2.23303e-88	+++-	1	0	0	0
cg25433552	5	159560548			----	2.53798e-88	-+++	1	0	0	1
cg03608167	2	136875637	CXCR4;CXCR4	Island	----	3.02984e-88	--+-	1	0	0	1
cg24664957	12	123381003	VPS37B	S_Shore	++++	3.07903e-88	-+--	1	0	0	0
cg03716838	6	32862618		Island	----	4.03323e-88	+++-	1	0	0	0
cg00039463	16	3931489	CREBBP;CREBBP	Island	----	5.04974e-88	++++	1	0	0	1
cg21493516	12	54446033	HOXC4	Island	----	5.27927e-88	++++	0.0536453	0	0	0
cg11210343	12	95869153	METAP2	S_Shore	++++	5.57439e-88	----	1	0	0	0
cg01706515	6	49681774	CRISP2;CRISP2;CRISP2;CRISP2;CRISP2		----	6.1974e-88	----	1	0	0	1
cg05254747	8	22223937	SLC39A14;SLC39A14;SLC39A14;SLC39A14	N_Shore	----	6.26299e-88	-+--	1	0	1	1
cg25240254	19	56000944	SSC5D	Island	----	6.5581e-88	++++	1	0	1	0
cg07121722	11	662523	DEAF1	S_Shore	++++	7.64019e-88	-+++	1	0	0	0
cg05695762	4	2059595		N_Shore	----	9.24692e-88	-+++	1	0	0	0
cg19135406	4	160219852	RAPGEF2		++++	1.00339e-87	-+-+	1	0	1	0
cg22695986	7	63386815		Island	++++	1.0493e-87	---+	1	0	0	0
cg24853438	5	77139492		N_Shore	----	1.52148e-87	++-+	1	0	0	1
cg05021771	2	71129289	VAX2	N_Shore	----	1.52804e-87	----	1	0	0	0
cg19601035	12	48399140	COL2A1;COL2A1	N_Shore	----	1.53787e-87	-+--	1	0	0	1
cg06241901	6	43244304	TTBK1	Island	----	1.70511e-87	-+-+	1	0	1	0
cg22762992	2	118616377		N_Shore	----	2.46257e-87	-+++	1	0	0	1
cg08976101	11	44328423	ALX4	S_Shore	----	2.54126e-87	++-+	1	0	1	0
cg25243008	17	59554806	TBX4		----	2.61996e-87	++++	1	0	0	1
cg15252215	10	124639110	LOC399815;FAM24B;FAM24B	Island	----	2.79703e-87	++++	1	0	0	1
cg05165665	14	93408116	ITPK1;ITPK1;ITPK1		++++	3.70533e-87	--++	1	0	0	0
cg09373148	3	138152837	ESYT3	N_Shore	----	3.93486e-87	++++	1	0	0	1
cg07141002	22	38201690	H1F0	Island	----	4.06602e-87	-+-+	1	0	0	0
cg00167941	11	70116446	PPFIA1;PPFIA1	Island	----	4.29556e-87	+-+-	1	1	0	1
cg08772588	19	56000201	SSC5D	N_Shore	----	5.01695e-87	++-+	1	0	0	1
cg16712472	21	35747390	FAM165B	Island	----	5.24648e-87	-+++	1	0	0	1
cg16922763	13	111719172		N_Shore	----	5.96787e-87	+++-	1	0	0	0
cg18833933	12	133185615		N_Shore	----	6.72205e-87	-+++	1	0	1	0
cg10773601	19	51226046	CLEC11A	N_Shore	----	7.14833e-87	----	1	0	1	0
cg14858616	10	72219819		S_Shore	----	8.42716e-87	----	1	0	0	1
cg03728296	12	58013271	SLC26A10	Island	----	1.05913e-86	++++	1	0	0	0
cg10397322	3	23244051	UBE2E2	Island	----	1.14111e-86	-+-+	1	0	0	0
cg26841507	12	56583252	SMARCC2;SMARCC2;SMARCC2;SMARCC2;SMARCC2;SMARCC2	N_Shore	----	1.21653e-86	+++-	1	0	0	1
cg24667603	15	96590566			++++	1.2526e-86	-+-+	1	0	0	0
cg18270687	1	39035982			----	1.3149e-86	-+++	6.22692e-19	0	1	1
cg13206556	13	20875399		N_Shore	----	1.54443e-86	----	1	0	1	0
cg06268875	18	11147385	FAM38B	N_Shore	----	1.62313e-86	-+++	9.58466e-05	0	1	1
cg00326958	10	43892075	HNRNPF;HNRNPF;HNRNPF;HNRNPF;HNRNPF;HNRNPF;HNRNPF	Island	++++	1.6428e-86	-++-	1	0	1	0
cg17949451	1	145476874	LIX1L	N_Shore	----	1.71166e-86	+++-	1	0	0	0
cg04972348	1	1100035		Island	----	1.83627e-86	++++	0.204252	0	0	0
cg02314896	19	49059802	SULT2B1	N_Shore	----	1.85922e-86	----	1	0	0	1
cg16882830	7	148823965	ZNF398;ZNF425	Island	----	1.88217e-86	+++-	1	0	0	0
cg12600749	7	157648749	PTPRN2;PTPRN2;PTPRN2	S_Shore	----	1.9412e-86	+-+-	1	0	0	0
cg20976174	3	183415827	YEATS2	Island	----	3.16756e-86	+++-	1	0	0	1
cg05485462	16	3062349	CLDN9	N_Shore	----	3.22003e-86	----	1	0	0	0
cg26440467	8	145654605	VPS28;NFKBIL2;VPS28	Island	----	3.54137e-86	++++	1	0	0	0
cg00014194	9	137978763	OLFM1;OLFM1	N_Shore	++++	4.19718e-86	----	1	0	0	0
cg24992471	17	47571963	NGFR	N_Shore	----	4.29556e-86	+--+	1	0	0	1
cg07371589	1	151104367	SEMA6C	Island	----	6.03345e-86	-+++	0.169724	0	0	1
cg22799420	14	102028994	DIO3;DIO3	Island	----	6.16461e-86	++++	1	0	0	0
cg00086809	16	640354	RAB40C	Island	----	7.08275e-86	+---	1	1	0	0
cg16495212	15	83317306	CPEB1	Island	----	7.90251e-86	-+++	1	0	0	0
cg21852429	17	36997740	C17orf98	S_Shore	----	8.36158e-86	++++	0.0538092	0	0	1
cg01611777	2	102359027	MAP4K4;MAP4K4;MAP4K4		++++	8.45995e-86	-+-+	1	0	0	0
cg25778892	7	1250126		N_Shore	++++	8.52553e-86	----	1	0	0	0
cg24295985	1	2431385	PLCH2	N_Shelf	----	8.9846e-86	+---	1	0	0	0
cg13475732	19	55972855	ISOC2;ISOC2;ISOC2	Island	++++	9.83715e-86	--+-	1	0	0	1
cg04890607	12	66262214	HMGA2;HMGA2		++++	9.90273e-86	--+-	1	0	0	0
cg17034331	5	77146318		N_Shore	----	1.01651e-85	++-+	1	0	1	1
cg18094330	7	100136910	AGFG2;AGFG2	Island	----	1.19357e-85	+++-	1	0	0	0
cg05349837	12	54430991	HOXC4	S_Shelf	----	1.28539e-85	++++	1	0	0	1
cg10207218	1	1714140		Island	----	1.5018e-85	++++	1	0	0	0
cg04134748	1	3052175	PRDM16;PRDM16		----	1.68543e-85	-+++	1	0	0	0
cg21434046	18	56435611		N_Shore	----	2.55766e-85	+-+-	1	0	0	1
cg20893919	4	122854168	TRPC3;TRPC3	Island	----	2.96426e-85	++-+	1	0	0	1
cg22374474	1	247681297		N_Shore	----	3.06263e-85	-+++	1	0	0	0
cg21052104	5	178712636	ADAMTS2;ADAMTS2		----	3.8037e-85	+---	3.69221e-13	0	0	0
cg13641043	17	43198610	PLCD3	Island	----	4.19718e-85	-+++	9.80436e-14	0	0	1
cg07343821	6	27637537			++++	4.26277e-85	++--	1	0	0	1
cg02749105	19	58879056	ZNF837;ZNF837	Island	----	4.55788e-85	++-+	0.0146147	1	0	1
cg04206644	13	52026632	INTS6;INTS6;INTS6	Island	----	5.08253e-85	++--	1	0	0	0
cg24280832	10	77871958	C10orf11	N_Shore	----	7.08275e-85	----	1	1	0	0
cg00319912	19	39441002	FBXO17;FBXO17	Island	----	9.50925e-85	+-++	1	0	0	0
cg10130900	16	68003410	SLC12A4;SLC12A4;SLC12A4	Island	----	1.30834e-84	++++	1	0	0	0
cg22370252	12	54446289	HOXC4;HOXC4	N_Shore	----	1.34769e-84	++++	0.0209072	0	0	1
cg10230427	6	57038227	BAG2	S_Shore	----	1.62641e-84	+++-	1	0	0	0
cg18337938	1	46932891		Island	----	1.79692e-84	---+	1	0	0	1
cg14022202	11	95656984	MTMR2;MTMR2;MTMR2;MTMR2	Island	----	3.443e-84	+-+-	1	0	0	1
cg10799055	6	27725188			----	3.77091e-84	+++-	1	0	0	0
cg06374097	3	185420396	IGF2BP2;IGF2BP2		++++	4.32835e-84	+---	1	0	1	0
cg07318204	4	145566441	HHIP	Island	----	4.45951e-84	-++-	1	0	1	0
cg08590939	5	41869963	OXCT1	Island	----	6.06624e-84	----	1	0	1	1
cg11829608	1	207224549	YOD1	N_Shore	++++	6.75484e-84	+++-	1	0	1	1
cg22501388	12	41583115	PDZRN4	S_Shore	----	8.09925e-84	+++-	1	0	1	0
cg11641395	5	110062398	TMEM232		----	8.16483e-84	++++	1	0	0	1
cg13502125	1	147826191		Island	----	8.19762e-84	-+++	1	0	0	0
cg01412856	16	33935608		N_Shore	----	8.52553e-84	++-+	1	0	0	0
cg25970575	4	6010164		S_Shore	++++	1.00667e-83	++-+	1	0	0	0
cg04348222	1	32802307	MARCKSL1	S_Shore	----	1.03618e-83	+---	1	0	1	1
cg25403152	8	60031829	TOX	Island	----	1.12144e-83	+-+-	1	0	0	0
cg03804621	10	124638756	FAM24B;LOC399815	Island	----	1.16078e-83	+-+-	1	0	0	0
cg07616871	2	218843504		Island	++++	1.22964e-83	+-+-	1	0	0	0
cg11367159	12	110044531			----	1.34769e-83	++-+	1	0	0	1
cg05568941	17	38517913	GJD3;GJD3	N_Shore	----	1.38048e-83	----	0.200022	0	0	0
cg23978657	1	89664260	GBP4		----	1.49197e-83	++--	1	0	0	1
cg24581226	5	8457970		Island	----	2.19893e-83	-+++	1	0	0	0
cg02382400	20	3218487	SLC4A11	N_Shore	----	2.38026e-83	----	1	0	1	1
cg25918716	1	45672438	ZSWIM5	S_Shore	----	3.13084e-83	++++	1	0	0	1
cg03298305	19	55972791	ISOC2;ISOC2;ISOC2	Island	++++	3.41021e-83	+-+-	1	0	0	1
cg10757027	7	150783788	AGAP3;AGAP3	Island	----	3.70205e-83	+++-	1	0	0	0
cg25936138	5	114193732			++++	3.84633e-83	++++	0.0630561	0	0	1
cg22889142	19	58862398	NCRNA00181;A1BG	Island	----	6.28922e-83	++-+	1	0	0	1
cg00766421	6	83902931	RWDD2A;PGM3;PGM3	Island	----	6.50236e-83	++--	1	0	0	0
cg08361238	1	117452304	PTGFRN	Island	----	6.83354e-83	+-++	1	0	1	1
cg10940957	8	146012870	ZNF34	Island	++++	7.34507e-83	+++-	1	0	0	1
cg14661148	5	71852862			----	8.56488e-83	-++-	1	0	0	1
cg12921411	5	150004918	SYNPO;SYNPO	Island	----	1.22013e-82	--+-	1	0	0	0
cg13661109	9	129433708	LMX1B	N_Shore	----	1.27621e-82	+++-	1	0	0	0
cg19728382	5	172757276	STC2	S_Shore	----	1.33654e-82	++-+	1	0	0	0
cg02619941	20	60370985	CDH4	N_Shelf	++++	1.94054e-82	+---	1	0	0	0
cg24413781	19	8273693	LASS4	Island	----	2.09072e-82	--+-	0.0901083	0	0	0
cg18371052	5	8457721		Island	----	2.17499e-82	-+++	1	0	0	1
cg17920868	4	71768662	MOBKL1A	Island	----	2.21959e-82	+++-	1	0	0	0
cg07891179	7	29923883	WIPF3	Island	----	2.356e-82	-+--	1	0	0	1
cg02197293	19	39523158	FBXO27;FBXO27	Island	----	2.61471e-82	+++-	2.23697e-05	0	0	1
cg17586988	18	5892245	TMEM200C	S_Shore	----	2.87146e-82	-+-+	1	0	1	0
cg10238080	12	50445058			----	2.88589e-82	++++	1	0	0	0
cg26543232	5	80597384	RNU5E;ZCCHC9;ZCCHC9;RNU5D;ZCCHC9	Island	----	3.14625e-82	+-+-	1	0	0	0
cg26149485	19	2428350	LMNB2;TIMM13	Island	----	3.79386e-82	+--+	1	0	0	0
cg07160353	5	176449617	ZNF346	Island	----	4.571e-82	+++-	1	0	0	0
cg10769767	9	37024153	PAX5	N_Shore	----	8.74851e-82	++++	1	0	0	0
cg10306035	10	23464518		S_Shore	----	9.33546e-82	++++	1	0	0	1
cg01923999	8	127568677	FAM84B	Island	++++	9.83715e-82	-+++	2.49241e-06	0	1	0
cg11345143	13	20989349	CRYL1	Island	----	1.29195e-81	++++	1	0	0	0
cg18165186	3	50314180	SEMA3B;SEMA3B	Island	----	1.31096e-81	++++	1	0	0	1
cg05708536	1	113285118		N_Shore	----	1.35917e-81	++++	1	0	0	1
cg18990042	12	48399169	COL2A1;COL2A1	Island	----	1.36048e-81	-+-+	1	0	0	1
cg19760250	17	36997627	C17orf98	Island	----	1.46311e-81	++++	1	0	0	1
cg02836830	20	3767452	CENPB	Island	----	1.53558e-81	+++-	1	0	0	0
cg20972453	13	20805460	GJB6;GJB6;GJB6;GJB6	N_Shore	----	1.53853e-81	+++-	1	0	1	0
cg05348216	6	27222905	PRSS16	S_Shelf	----	1.5405e-81	++-+	1	0	0	0
cg23022809	1	2230923	SKI	N_Shore	----	1.55788e-81	----	1	0	0	0
cg07168556	17	48912483	WFIKKN2		----	1.57165e-81	-+-+	1	0	0	0
cg20265528	2	105853269		Island	----	1.58313e-81	-+++	0.146869	0	0	0
cg12479444	7	63361394		Island	++++	1.62936e-81	++-+	1	0	0	0
cg23239444	6	34433320	PACSIN1	N_Shore	----	2.22123e-81	----	1	0	0	0
cg19844653	5	133451294	TCF7;TCF7;TCF7;TCF7;TCF7;TCF7;TCF7	S_Shore	----	2.27599e-81	--+-	0.00423325	0	0	0
cg14002328	9	126271315	DENND1A;DENND1A		++++	2.82129e-81	---+	1	0	0	0
cg10935723	14	88793634	KCNK10	S_Shore	----	2.88228e-81	++++	1	0	0	0
cg20366479	2	217501125	IGFBP2	S_Shelf	----	2.93409e-81	++++	1	0	0	0
cg11004890	20	3218500	SLC4A11	N_Shore	----	3.24921e-81	++-+	1	0	0	1
cg09912512	22	42761285		N_Shelf	----	3.26528e-81	++++	1	0	0	0
cg00082140	5	179816766		Island	----	3.34135e-81	++++	1	0	0	0
cg01700504	13	20805391	GJB6;GJB6;GJB6;GJB6	N_Shore	----	3.47907e-81	++++	0.339382	0	1	0
cg06663310	5	176153056			----	3.63647e-81	-+++	0.000390535	0	1	0
cg25646708	3	134031685		Island	----	3.97421e-81	++++	1	0	0	0
cg10646368	15	83974335			----	4.10209e-81	--+-	1	0	0	0
cg15902621	4	159579631			----	4.10537e-81	--+-	1	0	0	0
cg27383418	2	232055581			----	4.1939e-81	-+--	1	0	0	0
cg08452338	3	149271990	WWTR1;WWTR1;WWTR1		++++	4.20374e-81	---+	1	0	0	0
cg24718722	10	129536818	FOXI2	Island	++++	4.78085e-81	-++-	1	0	1	0
cg11507052	13	95618902		N_Shore	----	5.15467e-81	---+	1	0	0	1
cg22240717	21	44573947		Island	++++	5.79736e-81	++++	1	0	0	1
cg20225999	2	218843435		N_Shore	++++	7.65658e-81	+---	1	0	0	0
cg02344201	19	18632488	ELL	Island	----	8.8895e-81	++++	1	0	0	0
cg09224393	14	34268920	NPAS3;NPAS3;NPAS3;NPAS3	N_Shore	----	1.42081e-80	-+-+	0.745984	0	0	1
cg03044533	11	96065844	MAML2		++++	1.57821e-80	-+-+	1	0	0	0
cg25746923	17	47988546		S_Shore	----	1.61919e-80	--+-	1	0	0	1
cg02994923	2	121303745			----	1.63329e-80	+-++	1	0	0	0
cg26904169	7	89839865	STEAP2;STEAP2	N_Shore	----	1.64051e-80	++-+	3.27905e-07	1	0	0
cg15015426	1	159506559	OR10J5		++++	1.6815e-80	+---	1	0	0	0
cg26060667	1	247681242		N_Shore	----	1.95694e-80	-+++	1	0	0	0
cg16299003	10	124638804	FAM24B;LOC399815	Island	----	2.56618e-80	-+--	1	0	0	0
cg19180828	1	6265220	RNF207	N_Shore	----	2.57274e-80	++-+	1	0	0	0
cg19251564	6	166418922		N_Shelf	----	2.81047e-80	++++	1	0	0	1
cg12419334	4	184121800	WWC2		++++	2.92622e-80	----	0.999454	0	0	0
cg12847793	6	30852874	DDR1;DDR1	S_Shore	----	3.11772e-80	-+-+	1	0	0	0
cg07674022	4	122854330	TRPC3;TRPC3	S_Shore	----	3.20199e-80	++++	1	0	0	1
cg25293251	14	93260171	GOLGA5	N_Shore	----	3.42661e-80	-+++	1	0	0	0
cg09674170	16	3062382	CLDN9	N_Shore	----	3.725e-80	-+--	1	0	0	0
cg17372941	17	43222115		Island	----	3.77747e-80	---+	1	0	0	0
cg21251018	6	28226885	NKAPL	N_Shore	----	3.96109e-80	++-+	0.0935185	0	0	0
cg12944006	4	122853963	TRPC3;TRPC3	Island	----	4.19063e-80	++++	0.171527	0	0	0
cg22842797	17	48912621	WFIKKN2;WFIKKN2		----	5.37436e-80	++-+	1	0	0	1
cg00931742	8	57027301	MOS	S_Shore	----	5.45634e-80	++-+	1	0	0	1
cg00920949	19	1848350	REXO1	Island	----	6.64991e-80	+---	1	0	0	1
cg11372436	4	24797007	SOD3		----	7.75495e-80	++++	1	0	0	0
cg02958895	1	46999348		S_Shore	----	8.00416e-80	-+-+	1	0	0	0
cg03292743	2	74642838	C2orf81	Island	----	1.02011e-79	-+--	1	0	0	1
cg22079902	5	23507644	PRDM9		----	1.26768e-79	---+	1	0	0	1
cg12260435	2	202484156	ALS2CR11;ALS2CR11;ALS2CR11;ALS2CR11	S_Shore	----	1.42114e-79	-+--	1	0	0	0
cg26707664	18	60278353			----	1.43557e-79	----	0.670566	0	1	1
cg07332601	8	41072867			++++	1.45951e-79	---+	1	0	0	0
cg27516568	4	122686667	TMEM155;LOC100192379	S_Shore	----	1.50246e-79	-+++	0.00223139	0	1	0
cg25508830	15	100893944		S_Shelf	++++	1.55886e-79	----	1	0	1	0
cg19959917	10	44878373	CXCL12;CXCL12;CXCL12	N_Shore	----	1.63297e-79	-+++	1	0	1	1
cg16987638	6	1601509		N_Shore	----	1.91365e-79	-+--	1	0	0	0
cg17579753	17	34079998	GAS2L2		----	2.30353e-79	---+	1	0	1	0
cg08289350	17	74524371	CYGB		----	2.32222e-79	+--+	1	0	0	0
cg02251349	8	74004752	C8orf84	N_Shore	----	2.39403e-79	-+++	1	0	0	0
cg08795949	6	166419138		N_Shelf	----	2.39863e-79	++++	1	0	0	0
cg06801163	17	4686500	TM4SF5	S_Shore	----	2.49962e-79	++++	1	0	0	0
cg15142477	18	43915662	RNF165	S_Shore	----	3.01607e-79	--++	1	0	0	0
cg23484899	1	244894365		Island	----	3.3807e-79	++-+	1	0	0	1
cg25864523	6	28557388		S_Shelf	++++	5.01039e-79	++++	1	0	0	0
cg08640824	1	2162506	SKI	S_Shore	----	6.37119e-79	+---	7.48607e-07	0	0	0
cg14444751	5	157117513		Island	----	7.61395e-79	++++	0.0963385	0	0	0
cg00058163	18	5891948	TMEM200C	S_Shore	----	7.79102e-79	-+++	1	0	0	0
cg00536080	19	13409931	CACNA1A;CACNA1A	Island	----	8.43044e-79	+-++	1	0	0	1
cg25716013	6	75954053	COX7A2;COX7A2		----	8.437e-79	---+	1	0	0	1
cg25150243	15	50474159	SLC27A2;SLC27A2	N_Shore	----	1.12701e-78	--+-	1	0	0	0
cg18187198	6	27570442			++++	1.4559e-78	+-++	1	0	0	1
cg09965419	6	30854186	DDR1;DDR1	S_Shore	----	1.47524e-78	-+--	1	0	0	0
cg01733570	7	24797656	DFNA5;DFNA5;DFNA5	S_Shore	----	1.79758e-78	++-+	1	0	0	1
cg23179976	7	122529707		S_Shelf	----	1.88939e-78	-+-+	1	0	0	0
cg17140307	1	93251203	EVI5	S_Shore	----	1.97169e-78	-+++	0.0221762	0	1	1
cg13897914	15	41695294	NDUFAF1	S_Shore	----	2.21828e-78	++++	1	0	0	0
cg05977462	12	111475136	CUX2	Island	----	2.43797e-78	++++	1	0	1	1
cg08346820	11	22454661		S_Shore	----	2.52028e-78	-+-+	1	0	0	1
cg21038264	4	780856	CPLX1	S_Shore	----	2.61701e-78	--+-	1	0	0	0
cg26481829	15	69744762	RPLP1;RPLP1	N_Shore	----	3.21216e-78	+++-	1	0	0	0
cg18996663	14	55595768	LGALS3	Island	----	3.32168e-78	++++	0.0183725	0	0	0
cg23522872	5	8458392		S_Shore	----	3.37086e-78	-+-+	1	0	0	0
cg21743307	3	54159139	CACNA2D3	S_Shelf	----	3.7873e-78	-+--	1	0	0	1
cg17877220	5	8458089		Island	----	4.77102e-78	-+++	1	0	0	1
cg17525411	12	7341580	PEX5;PEX5;PEX5;PEX5;PEX5	N_Shore	----	4.95137e-78	---+	1	0	0	0
cg09240693	2	86038538		Island	----	5.22681e-78	--+-	1	0	0	1
cg16049391	15	83954395	BNC1	S_Shore	----	6.83026e-78	-++-	1	0	0	1
cg07327178	5	8457729		Island	----	8.02384e-78	-+++	1	0	0	0
cg25753010	13	32889434	BRCA2	N_Shore	----	8.05007e-78	----	1	0	0	0
cg12099459	1	147826902		S_Shore	----	8.80753e-78	++++	0.0814516	0	0	0
cg03264209	16	3931885		S_Shore	----	8.95509e-78	++++	1	0	0	1
cg23675524	19	39441205	FBXO17;FBXO17	S_Shore	----	1.1093e-77	+--+	1	0	0	1
cg06414816	5	110062837	TMEM232		----	1.1257e-77	----	1	0	0	0
cg05490924	2	74730755	LOC151534;LBX2	Island	----	1.22866e-77	-+++	0.00173822	0	0	0
cg21148531	6	106774172	ATG5	S_Shore	----	1.23719e-77	++++	1	0	0	1
cg21387281	20	61435439	OGFR	N_Shore	----	1.31293e-77	++--	1	0	0	0
cg14834925	5	124142396			++++	1.44639e-77	-+-+	1	0	1	0
cg23864949	8	99984534		N_Shore	----	1.48016e-77	++++	0.0786972	0	0	1
cg13897374	5	150004783	SYNPO;SYNPO	Island	----	1.55558e-77	--++	1	0	0	0
cg18888461	11	18477379	LDHAL6A;LDHAL6A;LDHAL6A;LDHAL6A	Island	----	1.79462e-77	++++	0.672533	0	0	0
cg16060369	10	43698834	RASGEF1A	S_Shore	----	1.81036e-77	-++-	1	0	0	0
cg23110482	6	29796614	HLA-G	S_Shore	----	1.93693e-77	++-+	1	0	0	0
cg22801949	1	181057279	IER5	N_Shore	----	2.94885e-77	-+-+	1	0	0	0
cg00079023	5	139492535	PURA	N_Shore	----	2.99443e-77	----	1	0	1	0
cg18394854	5	8457818		Island	----	3.46923e-77	++++	1	0	0	1
cg13775224	4	190475137			++++	3.79714e-77	++-+	0.000375779	0	0	0
cg11905611	12	14720974	PLBD1	Island	----	3.89551e-77	-++-	1	0	1	0
cg14654731	4	122685145	TMEM155;LOC100192379	N_Shore	----	3.92174e-77	-+++	0.000140475	0	0	0
cg26645709	15	89987792			----	4.01684e-77	----	0.123915	0	0	0
cg03108070	6	33245490	B3GALT4	Island	----	4.47918e-77	-+--	1	0	0	0
cg14417784	2	131009681		Island	++++	4.81037e-77	++++	1	0	0	1
cg15486454	3	133191270	BFSP2		----	4.86939e-77	-+++	1	0	0	1
cg23290482	17	36997720	C17orf98	S_Shore	----	4.87267e-77	++++	1	0	0	0
cg16931076	12	1702001	FBXL14	N_Shore	++++	5.57766e-77	----	1	0	0	0
cg21024112	6	41376993		Island	----	5.66948e-77	+-+-	1	0	0	0
cg02213822	9	128985576		Island	----	6.30233e-77	++++	1	0	0	1
cg12990591	4	2757781	TNIP2;TNIP2	Island	----	6.54826e-77	+-+-	1	0	0	0
cg21043657	12	33590837	SYT10	N_Shore	----	6.87289e-77	-+-+	1	0	0	1
cg04259752	8	23262159	LOXL2	S_Shore	----	9.33218e-77	+---	1	0	1	1
cg20673321	19	48049233	ZNF541	S_Shore	----	9.80436e-77	++-+	1	0	0	1
cg06023345	8	127568650	FAM84B	N_Shore	++++	1.03421e-76	+++-	1	0	1	0
cg04149978	1	10764896	CASZ1;CASZ1	Island	----	1.4077e-76	+-++	1	0	0	0
cg06714761	1	201096289			----	1.44442e-76	+-++	1	0	1	1
cg26321999	6	30854011	DDR1;DDR1	S_Shore	----	1.63264e-76	-+++	1	0	0	1
cg20559217	11	126173516	DCPS	N_Shore	----	1.71002e-76	--+-	5.33501e-05	0	0	0
cg00930781	1	4660565			++++	1.76249e-76	----	1	0	0	0
cg10530063	7	54827528	SEC61G;SEC61G	S_Shore	----	1.94284e-76	++++	1	0	0	1
cg15849368	17	1811181		N_Shore	----	1.94513e-76	----	1	0	0	0
cg06075652	16	86253508			----	2.04252e-76	++++	0.959778	0	0	0
cg14372753	22	18064176	SLC25A18	Island	----	2.28058e-76	++++	1	0	0	1
cg00767496	15	45671279	LOC145663;GATM	S_Shore	----	2.67111e-76	-+++	1.4818e-26	0	0	1
cg02276826	10	134778648		N_Shore	++++	2.75211e-76	++++	1	0	0	0
cg17186388	7	29923435	WIPF3	N_Shore	----	2.88917e-76	-+++	0.0454804	0	0	0
cg24680439	10	134778467		N_Shore	++++	3.20265e-76	++++	1	0	0	0
cg26537280	1	95699037	RWDD3;RWDD3	N_Shore	----	3.37086e-76	----	1	0	1	0
cg24308847	20	34653477		Island	----	3.38726e-76	++-+	1	0	0	0
cg09966978	9	33025025	DNAJA1	N_Shore	----	3.43972e-76	--+-	1	0	0	1
cg18148255	12	89476250			++++	3.63975e-76	+---	1	0	0	0
cg00940977	2	174877447		N_Shore	----	3.86272e-76	-+++	0.000841732	0	0	1
cg24922045	17	34079987	GAS2L2		----	5.57111e-76	-+++	1	0	0	0
cg13461447	1	1714001		Island	----	5.61701e-76	-+++	1	0	0	0
cg14086013	6	41604740	MDFI	Island	----	5.67604e-76	-+++	1	0	1	0
cg05806645	8	9009352	PPP1R3B	Island	----	5.7908e-76	-++-	1	0	1	0
cg05468064	22	46423449		Island	----	5.91541e-76	-+-+	1	0	0	1
cg02618733	19	1789460	ATP8B3	Island	++++	6.06952e-76	-+-+	1	0	0	0
cg00349061	1	26371865	SLC30A2;SLC30A2	N_Shore	----	6.74173e-76	++++	1	0	1	1
cg15753394	6	17282781	RBM24;RBM24;RBM24	S_Shore	----	7.17784e-76	++++	1	0	0	1
cg19506025	7	2671548	TTYH3	Island	----	7.34179e-76	+++-	1	0	0	1
cg12323063	17	67497879	MAP2K6		++++	7.50575e-76	---+	1	0	0	0
cg18085407	1	244080114		N_Shore	----	7.873e-76	-+++	5.49569e-07	0	0	0
cg12195369	19	55972957	ISOC2;ISOC2;ISOC2;ISOC2;ISOC2;ISOC2	Island	++++	8.47634e-76	+-+-	1	0	0	1
cg16783571	6	74064594	DPPA5	S_Shore	----	9.0305e-76	++-+	1	0	0	1
cg08011245	19	55975827		S_Shelf	----	9.3125e-76	+++-	1	0	1	0
cg23880589	17	7826623	KCNAB3	S_Shore	----	1.28309e-75	++++	1	0	0	0
cg13333265	1	10714675	CASZ1;CASZ1	Island	++++	1.5323e-75	+--+	1	0	0	0
cg00919055	5	149546946	CDX1	Island	----	1.63297e-75	-+++	1	0	1	1
cg12809341	3	75721888		Island	----	1.67199e-75	++-+	1	0	0	0
cg26263401	1	78511140	GIPC2	N_Shore	----	1.79758e-75	+---	1	0	0	1
cg15628222	8	71520989	TRAM1	S_Shore	----	2.05924e-75	-+-+	1	0	0	1
cg12231340	12	52685221	KRT81	Island	----	2.07859e-75	++++	1	0	0	0
cg14484793	9	137978463	OLFM1;OLFM1	N_Shore	++++	2.26877e-75	++-+	1	0	0	0
cg25438517	5	77146796		N_Shore	----	2.28747e-75	++++	1	0	1	1
cg05705089	20	42839217	C20orf111	Island	----	2.29861e-75	+---	1	0	0	1
cg09320367	1	40177469			----	2.5934e-75	--+-	1	0	0	0
cg06939851	1	226112534	PYCR2	Island	----	2.94065e-75	-+++	1	0	0	0
cg17758363	20	13199787		N_Shore	----	3.12362e-75	++-+	1	0	1	1
cg22986084	14	39901328	FBXO33	Island	----	4.01684e-75	+++-	1	0	0	0
cg14470209	3	128598183	ACAD9	Island	----	4.25293e-75	+++-	1	0	0	0
cg10583997	2	32583696	BIRC6	S_Shore	++++	4.95464e-75	-+-+	1	0	0	0
cg17843887	1	2542359	MMEL1		++++	5.12188e-75	--++	1	1	0	0
cg08643005	19	1652627	TCF3		----	5.15795e-75	+++-	1	0	0	0
cg27137258	16	2892782	TMPRSS8	Island	++++	5.37436e-75	-+--	1	0	0	0
cg08885224	6	133561368	EYA4;EYA4;EYA4	N_Shore	----	5.43339e-75	-+-+	1	0	1	1
cg14546619	12	58019647	B4GALNT1;SLC26A10	N_Shore	----	5.82359e-75	+---	1	0	0	1
cg06230848	8	127569163	FAM84B	Island	++++	6.26626e-75	-+++	6.01706e-11	0	0	0
cg19515035	2	74669516	RTKN	S_Shore	----	6.76796e-75	-+++	1	0	0	1
cg18076842	11	93262607	C11orf75		++++	6.87617e-75	-+-+	1	0	0	0
cg06484572	6	41605494	MDFI	Island	----	7.08931e-75	-+++	1	0	1	1
cg22254681	3	14444041	SLC6A6;SLC6A6;SLC6A6	Island	----	7.14505e-75	+-+-	1	0	0	0
cg14896134	10	88295386		Island	----	7.34179e-75	+++-	1	0	0	0
cg10848724	12	123380878	VPS37B	Island	++++	7.56149e-75	-++-	1	0	0	0
cg13303654	10	31610754	ZEB1;ZEB1;ZEB1;ZEB1;ZEB1	S_Shore	++++	7.84677e-75	-+-+	1	0	1	0
cg03140421	16	67200181	HSF4;HSF4	S_Shore	----	7.86316e-75	-+++	1.96054e-06	0	0	0
cg17434634	19	49522954		Island	++++	8.31239e-75	-+++	1	0	0	1
cg03089475	11	130030459	ST14	S_Shore	----	8.34518e-75	----	1	0	0	0
cg18001427	21	30391784	RWDD2B	S_Shore	----	8.77146e-75	-++-	1	0	0	0
cg07188648	11	111402694	C11orf88;C11orf88		++++	8.81409e-75	+-++	1	0	0	0
cg24625388	10	21463858	NEBL	S_Shore	----	8.94853e-75	++++	1	0	0	0
cg00184235	8	126442434	TRIB1	Island	----	1.0634e-74	+-+-	1	0	0	0
cg07059402	22	38244781	MIR659;EIF3L	N_Shore	----	1.35556e-74	++++	1	0	0	1
cg03124146	7	63361127		Island	++++	1.53361e-74	-+--	1	0	0	0
cg11839020	1	90309998	LRRC8D;LRRC8D	S_Shore	++++	1.64412e-74	---+	1	0	1	0
cg11374335	19	34971543	WTIP	N_Shore	----	1.6651e-74	++++	0.431851	0	0	0
cg06939852	16	51068651			++++	2.00055e-74	+---	1	0	0	0
cg19802390	1	2840177			++++	2.24648e-74	----	1	0	1	0
cg02064284	14	102990501			----	2.42355e-74	-++-	1	0	0	1
cg11117637	5	149546366	CDX1;CDX1	Island	----	2.53635e-74	++++	1	0	0	1
cg00002837	1	44513358			----	2.57012e-74	--+-	8.73867e-13	0	0	0
cg20632887	1	160085581	ATP1A2;ATP1A2		----	2.75703e-74	----	1	0	0	0
cg00796728	11	94276898	FUT4	Island	----	2.79047e-74	++++	1	1	0	1
cg02394686	19	55973099	ISOC2;ISOC2;ISOC2	Island	++++	2.85277e-74	+-+-	1	0	0	1
cg14218447	3	113418004		S_Shelf	----	2.85966e-74	++++	1	0	0	0
cg15037663	7	24797835	DFNA5;DFNA5;DFNA5	S_Shore	----	3.71188e-74	++++	1	0	0	1
cg19263433	2	118618151		Island	----	4.05946e-74	++++	0.300492	0	0	0
cg14240768	2	3622594	RPS7	N_Shore	----	4.12177e-74	+++-	1	0	0	0
cg03852670	4	48484997	SLC10A4	N_Shore	----	4.22014e-74	++++	1	0	0	1
cg01271735	9	68412757		N_Shore	----	4.69232e-74	+-++	1	0	0	0
cg00991495	7	100825899		S_Shelf	++++	5.12843e-74	++++	0.171101	0	0	1
cg25485913	19	49568962			----	5.71211e-74	++-+	1	0	1	0
cg04942251	11	63687247		S_Shore	----	5.88262e-74	----	1	0	1	0
cg11592082	1	27683345	MAP3K6	Island	----	6.13182e-74	++++	1	0	0	0
cg26038649	1	27683501	MAP3K6	Island	----	6.44005e-74	-+--	1	0	0	0
cg20179907	11	72336908	PDE2A;PDE2A;PDE2A;PDE2A		----	6.44989e-74	+---	1	0	1	0
cg07389611	17	59540267	TBX4	S_Shore	----	7.54181e-74	-+++	1	0	0	1
cg00970752	1	15711443	FHAD1		----	7.70905e-74	--+-	1	0	0	1
cg03416628	12	54446505	HOXC4;HOXC4	N_Shore	----	8.00088e-74	++-+	1	0	0	1
cg20749955	8	9009401	PPP1R3B	S_Shore	----	8.40093e-74	-+--	1	0	1	0
cg06569542	10	98946673	SLIT1	S_Shore	----	9.2666e-74	-++-	1	0	0	0
cg25836232	18	12306837	TUBB6	N_Shore	----	9.97487e-74	-+++	1	0	0	0
cg05113558	8	145702343	FOXH1	N_Shore	----	1.00372e-73	+---	1	0	0	0
cg17285709	2	220300242	SPEG	Island	----	1.15095e-73	+---	1	0	0	1
cg05913474	8	144815204	FAM83H	Island	----	1.48836e-73	+-+-	1	0	1	0
cg05946623	16	62071193	CDH8	S_Shore	----	1.53558e-73	++++	1	0	0	0
cg13854012	2	162103682		S_Shelf	----	1.73068e-73	++-+	1	0	0	1
cg21551271	16	867552		Island	++++	1.83037e-73	++++	1	0	0	0
cg07115262	12	52702819	KRT86	S_Shore	----	1.89267e-73	++++	1	0	0	1
cg24137660	9	125281227	OR1J4		++++	1.9776e-73	---+	1	0	0	1
cg04685442	8	49776492			----	2.17565e-73	--+-	1	0	0	0
cg05598727	5	8457548		Island	----	2.43174e-73	++++	1	0	0	1
cg18984151	3	47555476	C3orf75	S_Shore	----	2.81408e-73	++++	1	0	0	1
cg26306329	4	124400196			++++	2.84162e-73	+--+	1	0	0	0
cg05133205	6	32121249	PPT2;PPT2	N_Shore	----	3.302e-73	+++-	1	0	0	0
cg19419650	19	7929643	EVI5L;EVI5L	S_Shore	----	4.17095e-73	++++	1	0	0	0
cg14060518	5	134880967		S_Shore	----	5.29239e-73	-+--	1	0	0	0
cg02207554	17	11145805	SHISA6	S_Shore	----	5.87278e-73	-+-+	1	0	1	0
cg00275479	5	134882430		S_Shelf	----	6.4794e-73	-+--	1	0	1	0
cg04566512	22	46457588		Island	----	6.48596e-73	----	1	0	0	0
cg23033845	17	7758662	TMEM88	Island	++++	6.61056e-73	+--+	1	0	0	0
cg12054554	21	40760633	WRB;WRB	Island	----	6.61712e-73	-++-	1	0	0	0
cg26183870	14	100142298	HHIPL1	S_Shore	----	7.63691e-73	++++	1	0	0	0
cg00934322	6	30854109	DDR1;DDR1	S_Shore	----	7.69593e-73	-++-	1	0	0	0
cg15463284	11	18477534	LDHAL6A;LDHAL6A;LDHAL6A;LDHAL6A	Island	----	8.1386e-73	++++	1	0	0	0
cg24406754	12	64783110	C12orf56;C12orf56	N_Shore	----	8.73211e-73	-+++	1	0	0	1
cg17379932	10	12085598	UPF2;UPF2	S_Shore	----	9.18134e-73	++-+	1	0	0	1
cg05551825	7	5735129	RNF216;RNF216		++++	1.00568e-72	+-+-	0.432507	0	0	0
cg17762073	6	34024220	GRM4	Island	----	1.01421e-72	++++	0.549241	0	0	0
cg27434149	10	62332846			++++	1.06766e-72	---+	1	0	0	0
cg16760981	11	63688531		S_Shelf	----	1.25456e-72	--+-	1	0	0	0
cg00147172	22	46423604		Island	----	1.29162e-72	+-+-	1	0	0	0
cg27282281	7	112262583			----	1.62411e-72	-+++	1	0	0	0
cg09644356	2	121322010			----	1.71429e-72	----	1	0	0	0
cg09314434	6	31632207	BAT4;CSNK2B	N_Shore	----	1.79266e-72	+--+	1	1	0	0
cg06583577	5	115897444	SEMA6A		++++	1.89037e-72	++-+	1	0	0	0
cg06991974	1	2984218	FLJ42875;FLJ42875	Island	----	1.99137e-72	-+++	8.89278e-09	0	0	0
cg11320084	1	185014181	RNF2	N_Shore	----	2.33829e-72	+-++	1	0	0	0
cg26395193	11	1589526	HCCA2;DUSP8	N_Shelf	----	2.60291e-72	+---	1	0	0	0
cg01381586	2	10587627	ODC1;SNORA80B	N_Shore	++++	3.46268e-72	----	1	0	0	0
cg03908908	11	76849564	MYO7A;MYO7A;MYO7A	Island	----	3.55121e-72	++++	1	0	1	0
cg04715503	16	3062795	CLDN9;CLDN9	N_Shore	----	3.83977e-72	-++-	1	0	0	0
cg12953200	4	2795501	SH3BP2	S_Shore	----	4.12832e-72	++++	1	0	0	0
cg22563390	19	55973338	ISOC2;ISOC2;ISOC2	Island	++++	4.6169e-72	+++-	1	0	0	1
cg20067334	7	63387147		S_Shore	++++	4.86611e-72	+--+	1	0	1	1
cg26863172	1	1361729	TMEM88B	Island	----	5.00055e-72	--+-	1	0	0	0
cg15344726	13	20717346	GJA3	Island	----	5.03334e-72	+++-	1	0	0	0
cg22535729	8	55533955	RP1	Island	----	5.13499e-72	-+++	1	0	0	1
cg06239208	20	42543422	TOX2;TOX2;TOX2	Island	----	5.47273e-72	+++-	1.14177e-05	0	0	0
cg02941741	2	233793921	NGEF;NGEF	Island	----	5.75473e-72	-+++	1	0	0	0
cg27305460	15	29969096		S_Shore	----	6.21052e-72	+---	1	0	0	0
cg02030219	16	1958654		N_Shelf	----	7.22375e-72	-+++	1	0	0	1
cg01675158	14	99988776	CCDC85C		----	7.52542e-72	++-+	1	0	0	1
cg01345136	12	132904123	GALNT9	N_Shore	++++	7.65002e-72	++-+	1	0	0	1
cg20327845	10	3138418	PFKP		----	9.34857e-72	+---	1.32539e-07	0	0	0
cg17519938	1	3713580	LRRC47	S_Shore	----	9.77157e-72	+--+	1	0	0	1
cg18049167	6	32121261	PPT2;PPT2	N_Shore	----	1.12176e-71	+++-	1	0	0	0
cg17721910	19	12997021	KLF1	Island	----	1.15423e-71	-+++	1	0	0	0
cg06417985	4	190475027			++++	1.18374e-71	++++	1	0	0	0
cg21298978	8	143961391	CYP11B1;CYP11B1		++++	1.19456e-71	----	1	0	1	0
cg24392955	12	54454325	FLJ12825	Island	----	1.20767e-71	++++	0.0137359	0	0	1
cg12203852	14	58765243	FLJ31306;ARID4A;FLJ31306;ARID4A;ARID4A;ARID4A;ARID4A;ARID4A	Island	++++	1.36736e-71	++-+	1	0	0	0
cg08447044	6	165902024	PDE10A;PDE10A		++++	1.41524e-71	----	0.0669582	0	0	0
cg24116779	7	100841554	MOGAT3	N_Shelf	----	1.47098e-71	++++	1	0	0	1
cg07026636	14	103691799			----	1.59591e-71	----	1	1	0	1
cg06603923	7	151217961	RHEB	S_Shore	----	1.59755e-71	++-+	1	0	0	0
cg20587236	12	109900956	KCTD10		++++	1.69199e-71	----	1	0	0	0
cg13617561	11	67222073	CABP4		----	1.7097e-71	----	1	0	1	0
cg03125400	2	43327937		Island	----	2.02514e-71	----	1	0	0	1
cg27243166	11	64479496	NRXN2;NRXN2	Island	----	2.23172e-71	-+++	1	0	0	1
cg25472897	8	145560555	SCRT1	Island	----	2.37666e-71	+++-	0.478741	0	0	1
cg07187855	6	30854161	DDR1;DDR1	S_Shore	----	2.64357e-71	-+-+	1	0	0	0
cg19509778	10	129537308	FOXI2	Island	++++	2.73046e-71	-+--	1	0	1	0
cg25036261	2	51254823	NRXN1;NRXN1	Island	----	2.84687e-71	+---	1	0	0	0
cg19424531	8	65711522	CYP7B1	Island	----	2.9659e-71	++++	0.0193333	0	0	1
cg05590267	1	244615585	ADSS	Island	----	3.11772e-71	+++-	1	0	0	0
cg06618740	1	1100126		Island	----	3.48563e-71	++-+	1	0	0	0
cg11199428	13	52027379	INTS6;INTS6;INTS6	Island	----	3.93486e-71	+++-	1	0	0	0
cg13076718	19	2945492	ZNF77	Island	++++	5.69571e-71	++--	1	0	0	1
cg06655187	17	34842929	ZNHIT3	Island	----	5.69899e-71	+++-	1	0	0	0
cg06813382	10	81967195		Island	----	5.81376e-71	-+--	1	0	0	1
cg20871826	17	3790402	CAMKK1;CAMKK1;CAMKK1	N_Shore	----	6.32201e-71	-+++	7.68281e-19	0	0	0
cg13700815	12	133533354	ZNF605;ZNF605	S_Shore	----	6.65647e-71	++-+	1	0	0	0
cg00046336	2	118617230		Island	----	7.77463e-71	++++	1	0	0	0
cg18973515	15	65713476	IGDCC4	N_Shore	----	8.65669e-71	++-+	1	0	1	1
cg02455706	16	84918851	CRISPLD2		----	1.03061e-70	-+++	0.0061351	0	1	1
cg11324650	3	194014745		Island	----	1.11324e-70	++++	1	0	0	0
cg27211198	2	121776456			----	1.15914e-70	-+++	1	0	0	0
cg18407136	15	83681092	C15orf40;C15orf40;C15orf40;C15orf40;C15orf40;C15orf40;C15orf40	S_Shore	----	1.23325e-70	---+	1	0	0	1
cg04157161	17	7906847	GUCY2D	Island	----	1.42409e-70	++++	1	0	0	1
cg08200293	11	569357	MIR210	Island	----	1.47787e-70	++-+	1	0	0	0
cg04247152	16	88590325	ZFPM1	Island	----	1.49951e-70	--+-	1	0	0	0
cg02932167	2	233352951	ECEL1	Island	----	1.60346e-70	++--	1	0	0	0
cg23009355	11	68451396	GAL	Island	----	1.72675e-70	++-+	1	1	0	0
cg02283735	1	44011587	PTPRF;PTPRF		----	1.9025e-70	-+++	1	0	0	0
cg16171484	2	223290515	SGPP2	S_Shore	----	2.05892e-70	----	1	0	0	0
cg03928032	17	79244651	SLC38A10;SLC38A10		++++	2.1563e-70	+-++	1	0	0	1
cg14091258	7	157406607	PTPRN2;PTPRN2;PTPRN2	Island	++++	2.53864e-70	++++	1	0	0	1
cg27130176	16	3085982	CCDC64B	N_Shore	----	2.6239e-70	----	0.0464641	0	0	0
cg27567761	10	64573184	EGR2;EGR2;EGR2;EGR2	Island	----	2.71079e-70	-+-+	1	0	1	1
cg24281267	6	35479648	TULP1	Island	----	2.77145e-70	+++-	1	0	0	0
cg27422857	2	105853526		Island	----	3.19773e-70	-+++	1	0	0	0
cg16343401	17	42989147	GFAP;GFAP	Island	----	3.50203e-70	++++	1	0	0	0
cg12613020	5	134881662		S_Shore	----	3.8496e-70	-+--	1	0	1	0
cg04662609	5	180646976		Island	----	3.92174e-70	-+++	1	0	0	1
cg14142171	6	30228101	HLA-L	Island	----	3.95126e-70	-++-	1	0	0	0
cg09739413	6	32729498	HLA-DQB2	Island	----	4.00044e-70	++++	0.200645	0	0	0
cg16279786	2	51255306	NRXN1;NRXN1	Island	----	4.46279e-70	+--+	1	0	0	0
cg10875257	6	28554274	SCAND3	N_Shore	----	4.72183e-70	+-++	1	0	0	0
cg00853733	12	122244223	SETD1B	S_Shore	++++	4.87595e-70	-++-	1	0	1	0
cg16620608	7	100841473	MOGAT3	N_Shelf	----	5.22025e-70	++++	1	0	0	1
cg25828185	12	54455656	FLJ12825	S_Shore	----	6.18429e-70	+--+	1	0	0	0
cg00591868	19	19729048	PBX4	N_Shore	----	8.2009e-70	+---	1.28244e-28	0	0	0
cg14481208	2	74669375	RTKN	Island	----	9.57155e-70	--+-	1	0	0	1
cg23153227	6	27725408			----	1.07094e-69	++++	1	0	0	1
cg13939055	1	244094869		Island	----	1.16308e-69	++++	1	0	0	0
cg01602730	1	153671011			----	1.48213e-69	+++-	1	0	0	0
cg01311537	10	50386709	C10orf128		++++	1.51951e-69	---+	1	0	0	0
cg15231205	21	44573854		Island	++++	1.60608e-69	++++	1	0	0	1
cg21287017	20	9498109	C20orf103	S_Shore	----	1.83168e-69	++++	1	0	0	0
cg15003434	9	136202985	SURF6;SURF6	Island	----	2.00842e-69	+-+-	1	0	0	0
cg05086567	17	7486615	MPDU1;MPDU1	Island	----	2.03727e-69	++++	1	0	0	0
cg10062919	17	38503802	RARA;RARA;RARA;RARA	S_Shore	----	2.23697e-69	--+-	1	0	0	0
cg08961832	11	279185	NLRP6	Island	----	2.28091e-69	-++-	1	0	0	0
cg21842274	5	76248637	CRHBP	N_Shore	----	2.39207e-69	---+	1	0	0	0
cg14399122	9	137660670	COL5A1	Island	----	2.43142e-69	--+-	1	0	1	0
cg02067535	3	196366191	LRRC33	N_Shore	++++	2.44125e-69	+---	1	0	0	1
cg04981619	2	43328122		Island	----	2.58947e-69	-++-	1	0	0	1
cg26349554	11	85522295	SYTL2	S_Shore	----	2.86687e-69	+++-	1	0	0	1
cg06916011	19	55594963	EPS8L1;EPS8L1	Island	++++	2.89704e-69	-+++	0.314428	0	0	0
cg14299483	14	101967780			----	3.01804e-69	++++	0.048202	0	0	0
cg13877106	11	126173568	DCPS	Island	----	3.43972e-69	--+-	1	0	0	1
cg26660457	16	1664468	CRAMP1L	Island	----	3.49219e-69	+++-	1	0	0	0
cg16876823	19	2987082	TLE6;TLE6		----	3.56433e-69	--++	1	0	1	0
cg09113474	6	1601369		N_Shore	----	3.78402e-69	-+--	1	0	1	0
cg26775176	6	27725308			----	4.02339e-69	++++	1	0	0	1
cg03915638	3	62356042	FEZF2	N_Shore	----	4.16767e-69	++++	0.357416	0	0	0
cg15712226	12	96252066	SNRPF	Island	----	4.53493e-69	+++-	1	0	0	0
cg02344735	6	71664559	B3GAT2	N_Shore	----	4.57755e-69	-+++	1	0	0	0
cg01807946	17	80205481	CSNK1D;CSNK1D	N_Shore	++++	4.9612e-69	+-++	1	0	0	0
cg24389054	7	27194013	HOXA7	N_Shore	++++	5.97771e-69	----	1	0	0	0
cg10161743	19	48917816	GRIN2D	N_Shore	----	6.20068e-69	-+++	1	0	0	1
cg03699601	14	105995755	TMEM121	Island	----	6.79747e-69	-+++	0.000575801	0	0	0
cg03229627	7	4922039	RADIL	N_Shore	----	8.63374e-69	+++-	1	0	0	0
cg08950537	10	95361933	RBP4	S_Shore	----	9.02067e-69	++-+	1	0	0	0
cg06489965	16	3062975	CLDN9;CLDN9	N_Shore	----	9.06657e-69	-+-+	1	0	0	0
cg22481770	3	156324118			----	9.7355e-69	++++	1	0	0	0
cg24535176	6	133561386	EYA4;EYA4;EYA4	N_Shore	----	1.00011e-68	-+-+	1	0	0	1
cg05517791	7	73157351		S_Shelf	----	1.23883e-68	++++	0.144114	0	0	1
cg00442658	21	18885041	CXADR	Island	----	1.25129e-68	+++-	1	0	0	1
cg20623052	11	65419955		Island	----	1.30473e-68	----	1	0	0	0
cg03765423	3	194014481		Island	----	1.37491e-68	++++	1	0	0	0
cg23222488	5	176755393		N_Shelf	----	1.39261e-68	---+	1	0	0	0
cg17329164	6	32121259	PPT2;PPT2	N_Shore	----	1.44737e-68	++--	1	0	0	0
cg19384825	19	55973228	ISOC2;ISOC2;ISOC2	Island	++++	1.51623e-68	+-+-	1	0	0	0
cg13707224	9	1043825		N_Shore	----	1.8002e-68	++++	1	0	0	0
cg14585415	10	102778683	PDZD7	Island	----	2.03826e-68	---+	1	0	0	0
cg05778424	17	55169508	AKAP1		++++	2.2009e-68	++-+	1	0	0	0
cg04843111	1	156617074	BCAN;BCAN	S_Shore	----	2.26451e-68	+-+-	1	0	0	0
cg15407819	19	41062024	SPTBN4;SPTBN4	S_Shore	----	2.27402e-68	-+-+	1	0	0	1
cg02343736	11	75142012	KLHL35	S_Shore	----	2.78227e-68	-+++	1	0	0	0
cg16284279	6	77743952			++++	2.96426e-68	++++	1	1	0	0
cg20171297	12	81101474	MYF6;MYF6	N_Shore	----	3.17346e-68	++-+	1	0	1	0
cg23564474	7	153109538			++++	3.19937e-68	--+-	1	0	0	0
cg13598480	20	3145356	ProSAPiP1	Island	----	3.3807e-68	++++	1	0	0	0
cg25550468	7	112262557			----	3.45612e-68	-+++	1	0	0	0
cg18064468	17	46570458		Island	----	3.86272e-68	+--+	1	0	0	0
cg06588556	11	18477299	LDHAL6A;LDHAL6A	Island	----	4.08242e-68	++++	0.77943	0	0	0
cg16003238	15	65670876	IGDCC3	S_Shore	----	4.37753e-68	++-+	1	0	0	0
cg27110206	12	54750276			----	4.84971e-68	+---	3.28561e-10	0	0	0
cg06583696	2	26101536	ASXL2	Island	++++	5.30878e-68	--+-	1	0	0	1
cg04562562	17	61044133		Island	----	5.65636e-68	+++-	1	0	0	0
cg25142479	6	70993440	COL9A1;COL9A1	S_Shore	----	5.98099e-68	---+	1	0	0	1
cg06618497	14	102198604	C14orf72		++++	6.03017e-68	+-++	1	0	0	0
cg19403339	2	183580841	DNAJC10	Island	----	6.68598e-68	+-+-	1	0	0	0
cg02242734	22	18064224	SLC25A18	S_Shore	----	7.25982e-68	-+-+	1	0	0	0
cg25929976	3	12328656	PPARG;PPARG	N_Shore	----	7.78774e-68	-+++	0.00140802	0	1	1
cg12051710	12	2989070	C12orf32;C12orf32;C12orf32	S_Shelf	++++	8.6239e-68	++--	1	0	0	0
cg20703261	6	41375153		Island	----	9.45022e-68	+---	1	0	1	0
cg04015962	1	10949192			----	9.50924e-68	+++-	1	0	0	1
cg03131358	22	42195972	CCDC134	Island	----	9.85027e-68	---+	1	0	0	1
cg00889363	2	206255841	PARD3B;PARD3B;PARD3B		++++	1.20964e-67	----	0.046333	0	0	0
cg26438105	18	5892119	TMEM200C	S_Shore	----	1.25686e-67	++-+	1	0	0	0
cg11840984	3	138762690	PRR23C	Island	----	1.34212e-67	+--+	1	0	0	0
cg25202261	1	151668357	SNX27		++++	1.34638e-67	++-+	1	0	0	0
cg23689428	2	121223964	LOC84931		----	1.47754e-67	----	1	0	0	0
cg03295928	2	74669349	RTKN	Island	----	1.59526e-67	-+++	1	0	0	1
cg17512474	5	149546335	CDX1	Island	----	1.64707e-67	++++	1	0	0	1
cg21686577	7	75909905	SRRM3	Island	----	1.6569e-67	-+--	1	0	0	1
cg19319558	7	1793191			++++	1.84512e-67	-+++	1	0	1	0
cg09203312	13	20805196	GJB6;GJB6;GJB6;GJB6;GJB6	N_Shore	----	2.28156e-67	++-+	1	0	1	0
cg07123730	8	144502809		N_Shore	----	2.49568e-67	++++	0.323806	0	1	0
cg07083023	2	51254981	NRXN1;NRXN1	Island	----	2.68521e-67	++++	1	0	0	0
cg13410002	20	20353861		S_Shelf	----	4.26604e-67	-+++	1	0	0	0
cg20964304	11	125040416	PKNOX2	S_Shelf	----	4.31851e-67	-+-+	1	0	1	1
cg20351495	1	2408494	PLCH2	N_Shore	++++	4.42016e-67	+---	2.1104e-10	0	0	0
cg16824477	17	40192449		Island	----	4.4759e-67	++++	1	0	0	0
cg22022881	2	105853494		Island	----	4.77758e-67	-+++	1	0	0	0
cg18184769	1	12039714	MFN2;MFN2	N_Shore	----	4.8202e-67	+--+	1	0	0	1
cg15928106	7	130646078	FLJ43663;FLJ43663		----	5.09564e-67	----	1	0	0	0
cg21291672	1	29451713	TMEM200B	Island	----	6.28594e-67	++-+	1	0	0	1
cg26090072	2	74669387	RTKN	Island	----	6.29906e-67	----	1	0	0	1
cg00478851	11	7534329	PPFIBP2	N_Shore	----	6.3384e-67	----	1	0	1	0
cg07832772	5	8461832		S_Shelf	++++	9.68303e-67	----	0.0557438	0	0	0
cg12001634	4	2059525		N_Shore	----	9.72566e-67	---+	1	0	0	0
cg16470140	15	77862098			----	1.12275e-66	-++-	1	0	0	0
cg18605031	3	49314155	C3orf62	N_Shore	----	1.21128e-66	-+++	1	0	1	0
cg16111190	6	30860887	DDR1;DDR1;DDR1		----	1.37064e-66	-+--	1	0	0	0
cg26201952	12	54446253	HOXC4;HOXC4	N_Shore	----	1.39065e-66	++++	1	0	0	1
cg06888460	11	18477303	LDHAL6A;LDHAL6A	Island	----	1.77725e-66	++++	1	0	0	0
cg07536502	5	71852464			----	1.8261e-66	-+++	1	0	0	1
cg01302668	6	117087238	FAM162B	S_Shore	----	2.25992e-66	++++	1	0	0	1
cg08057985	22	42470123	FAM109B	Island	----	2.27107e-66	-+++	1	0	0	0
cg03481039	11	116662012	APOA5;APOA5	S_Shore	----	2.34124e-66	----	1	0	1	1
cg07946633	1	2984245	FLJ42875;PRDM16;FLJ42875;PRDM16	Island	----	2.37108e-66	-+++	1	0	0	0
cg18892446	5	73938574	ENC1	S_Shore	++++	2.5993e-66	-+-+	1	0	0	0
cg06203364	1	2137307	C1orf86	Island	----	2.88589e-66	-++-	1	0	0	0
cg09405380	19	19730109	PBX4	S_Shore	----	3.03279e-66	+--+	1	0	1	0
cg05487207	8	22224126	SLC39A14;SLC39A14;SLC39A14;SLC39A14	N_Shore	----	3.06985e-66	+++-	1	0	0	0
cg20079298	15	40572326		Island	----	3.11444e-66	++-+	1	0	0	0
cg06840491	10	48416966	GDF2	S_Shelf	----	3.11838e-66	--+-	1	0	1	0
cg08877624	8	141521446	CHRAC1;CHRAC1;CHRAC1	Island	----	3.12362e-66	+++-	1	0	0	0
cg20098478	12	65515862	WIF1	Island	----	3.43317e-66	++-+	0.594492	0	0	0
cg14413904	10	62423377			++++	3.69877e-66	---+	1	0	0	0
cg26115216	3	138739916	PRR23B	Island	----	4.48246e-66	++++	1	0	0	1
cg02019125	3	156323952			----	5.27927e-66	-+++	1	0	0	0
cg12094552	21	46449961		S_Shore	----	5.35797e-66	+---	1	0	0	0
cg05845403	13	96293882	DZIP1;DZIP1	Island	----	5.57439e-66	++++	0.415456	0	0	0
cg16414659	3	145736001			----	5.93508e-66	-++-	1	0	0	0
cg16844661	11	2188244	TH;TH;TH	Island	----	6.03345e-66	----	1	0	0	1
cg22841667	11	8705620	RPL27A;SNORA45;SNORA3	S_Shore	----	6.67942e-66	+++-	1	0	0	1
cg17966709	11	57435952	ZDHHC5	Island	----	6.96142e-66	+++-	1	0	0	1
cg02992639	1	155098827		Island	----	7.26965e-66	----	0.313379	0	0	1
cg10256477	12	49934029	KCNH3	S_Shore	----	7.87956e-66	----	1	0	1	1
cg12108029	8	126010861	SQLE;SQLE	Island	----	8.54193e-66	+++-	1	0	0	0
cg26740318	11	18477153	LDHAL6A;LDHAL6A	N_Shore	----	9.4699e-66	++++	1	0	0	0
cg19706795	7	24797839	DFNA5;DFNA5;DFNA5	S_Shore	----	9.81748e-66	-+-+	1	0	1	1
cg03928961	3	196693980	PIGZ	Island	----	1.03946e-65	++-+	1	0	0	1
cg03345116	11	114104210	ZBTB16;ZBTB16		++++	1.05421e-65	----	1	0	0	0
cg16405575	12	3186173	TSPAN9;TSPAN9	Island	----	1.15226e-65	++++	1	0	0	1
cg11968118	17	16474839		S_Shelf	----	1.16341e-65	----	1	1	0	0
cg17242351	15	35086890	ACTC1		----	1.1857e-65	-+++	1	0	0	1
cg04086394	1	193082764			++++	1.49164e-65	+--+	1	0	0	0
cg25757140	19	38039469		N_Shore	----	1.80282e-65	-+++	1	0	0	0
cg14132536	9	130700442	DPM2;DPM2	S_Shore	----	2.21565e-65	---+	1	0	1	0
cg21549422	6	70993107	COL9A1;COL9A1	S_Shore	----	2.33698e-65	-+++	1	0	0	1
cg01048561	3	50711663	DOCK3	N_Shore	----	2.43666e-65	-+--	1	0	1	0
cg13912631	9	136075279		N_Shore	++++	2.44125e-65	++++	1	0	0	1
cg22109795	1	210468650		S_Shelf	----	2.63603e-65	---+	1	0	0	1
cg10589310	5	23507030	PRDM9		----	2.7039e-65	-+++	1	0	0	0
cg14034325	10	43891459	HNRNPF;HNRNPF;HNRNPF;HNRNPF;HNRNPF;HNRNPF	N_Shore	++++	2.98623e-65	+-+-	1	0	1	0
cg11499699	17	74382495	SPHK1;SPHK1;SPHK1;SPHK1	Island	----	3.04722e-65	+-+-	1	0	0	0
cg13906860	11	85393895			----	3.0846e-65	-++-	1	0	0	1
cg11705208	1	27683386	MAP3K6	Island	----	3.31184e-65	-+++	1	0	0	0
cg15730491	1	221068834		Island	----	3.46596e-65	-+++	1	0	1	1
cg00187229	4	788140	CPLX1	N_Shore	----	3.66926e-65	-+++	0.395781	0	1	0
cg02470697	2	48844916	GTF2A1L;STON1-GTF2A1L;GTF2A1L	Island	----	3.88895e-65	++++	1	0	0	1
cg24696183	11	2891360	KCNQ1DN	S_Shore	----	4.25949e-65	-++-	1	0	0	0
cg25618424	1	2989307	PRDM16;PRDM16	N_Shore	----	6.4335e-65	-++-	1	0	1	0
cg03577139	4	24796988	SOD3		----	6.64663e-65	+---	1	0	1	0
cg07304536	16	86987635			----	7.03684e-65	++++	1	0	0	0
cg22344745	1	227746294		Island	----	7.35819e-65	+++-	1	0	0	0
cg15127733	20	3713584	HSPA12B	S_Shore	----	7.52214e-65	++++	1	0	1	0
cg03225580	5	38256147		N_Shore	----	9.05346e-65	-+-+	1	0	0	0
cg09943102	7	73157788			----	9.19446e-65	++++	1	0	1	1
cg10663765	3	194014592		Island	----	9.96503e-65	+++-	1	0	0	0
cg05208396	19	13975186		N_Shore	----	1.03192e-64	--+-	1	0	0	0
cg06057569	22	50219754	BRD1	N_Shore	++++	1.08799e-64	++-+	1	0	0	0
cg25170034	17	33288066	ZNF830;CCT6B	N_Shore	----	1.19653e-64	++++	1	0	0	1
cg18384926	15	45722598	C15orf48;C15orf48	Island	----	1.2021e-64	+++-	1	0	0	0
cg00662002	14	104314734	PPP1R13B	Island	----	1.23391e-64	-+++	2.83703e-05	0	0	0
cg16394260	1	93811744	DR1;DR1	Island	----	1.26079e-64	+++-	1	0	0	0
cg14019407	12	133185655		N_Shore	----	1.26768e-64	-+++	1	0	0	0
cg08570243	2	110969853	NCRNA00116	Island	----	1.60018e-64	--+-	1	0	0	1
cg03222868	12	49933636	KCNH3	Island	----	1.66117e-64	++++	1	0	0	0
cg25343227	22	42353589	LOC339674	N_Shore	----	2.10449e-64	+++-	1	0	0	0
cg00380835	19	51165752	SHANK1	Island	----	2.13532e-64	++++	0.52432	0	1	0
cg18474934	4	122853965	TRPC3;TRPC3	Island	----	2.13958e-64	++++	1	0	0	0
cg27202913	16	89258862	CDH15	Island	++++	2.46617e-64	----	1	0	0	1
cg27264390	8	53327058			----	3.04034e-64	+--+	1	0	1	0
cg06200514	11	7052239	NLRP14		++++	3.443e-64	-+++	1	0	0	0
cg19531536	14	76873334	ESRRB		----	3.61351e-64	---+	1	0	0	0
cg13796381	9	139872395	PTGDS	Island	----	3.6627e-64	----	1	0	0	0
cg08991643	3	194014928		Island	----	3.66598e-64	-++-	1	0	0	0
cg25354127	3	142681595	PAQR9	Island	----	3.67582e-64	+-++	1	0	0	0
cg21010202	6	1615843		Island	----	3.80042e-64	++--	1	0	1	0
cg14825828	1	220219906	EPRS;EPRS	S_Shore	----	4.12177e-64	+++-	0.00289048	0	0	0
cg26160196	6	18264854	DEK;DEK	Island	----	4.23325e-64	+++-	1	0	0	0
cg14807565	10	94179972		N_Shore	----	4.31195e-64	++++	0.0368237	0	0	0
cg04015777	13	103426481	C13orf27	Island	----	4.34474e-64	-+-+	1	0	0	1
cg15056966	3	120003702		N_Shore	----	4.50869e-64	-+++	1	0	0	1
cg23105130	8	144799022	MAPK15	Island	----	4.78085e-64	-+--	1	0	0	0
cg17410295	12	109729809	FOXN4	Island	----	4.99399e-64	+++-	1	0	0	0
cg27009812	16	3062597	CLDN9;CLDN9	N_Shore	----	5.15139e-64	----	1	0	0	0
cg08515989	16	29912904	ASPHD1	Island	----	5.34485e-64	++++	0.87026	0	0	0
cg17005273	17	74524238	CYGB		----	5.43994e-64	++++	1	0	0	0
cg05844798	20	3062344		N_Shore	----	5.90885e-64	+---	0.958466	0	0	0
cg03288922	2	118616237		N_Shore	----	7.01389e-64	-+++	1	0	0	1
cg25145687	11	1606664	HCCA2;KRTAP5-1;LOC338651		++++	7.25982e-64	++-+	1	0	0	0
cg03434624	12	123380883	VPS37B	Island	++++	7.55165e-64	+++-	1	0	0	0
cg15638292	11	76849451	MYO7A;MYO7A;MYO7A	Island	----	7.64674e-64	-+++	1	0	0	0
cg10536151	11	17758285	KCNC1;KCNC1	Island	----	8.04023e-64	+-++	1	0	0	1
cg17868694	7	100841533	MOGAT3	N_Shelf	----	8.34846e-64	++-+	1	0	0	1
cg17074220	10	18828486	CACNB2;CACNB2;CACNB2;CACNB2;CACNB2;CACNB2;CACNB2;CACNB2;CACNB2		++++	9.12232e-64	--+-	1	0	0	0
cg25964954	18	12377388	AFG3L2	S_Shore	----	9.29939e-64	+++-	1	0	0	0
cg00530870	5	34864283	TTC23L		++++	9.92896e-64	++-+	2.87114e-07	0	0	0
cg14706297	2	43328266		Island	----	1.15127e-63	--+-	1	0	0	1
cg25464265	1	221063484		N_Shore	----	1.17587e-63	--++	1	0	1	0
cg19693031	1	145441552	TXNIP		----	1.25293e-63	+--+	1	0	0	0
cg20821980	20	3145359	ProSAPiP1	Island	----	1.25489e-63	++++	1	0	0	0
cg09332353	6	27215376	PRSS16	N_Shelf	----	1.3972e-63	++-+	1	0	0	0
cg02765403	19	59075349	MZF1;MZF1;LOC100131691	S_Shore	----	1.71298e-63	--+-	4.13488e-10	0	0	0
cg22194188	17	62341149	TEX2	S_Shore	----	1.75298e-63	-+++	1	0	0	0
cg14348540	8	22224272	SLC39A14;SLC39A14;SLC39A14;SLC39A14	N_Shore	----	1.95858e-63	+---	1	0	0	1
cg21226442	12	27088580	C12orf11	N_Shelf	++++	2.26287e-63	-+-+	1	0	0	0
cg26824850	8	145107857	OPLAH	Island	----	2.29074e-63	+--+	1	0	0	1
cg15731053	7	123673910	TMEM229A	S_Shore	----	2.34091e-63	++++	0.0145721	0	0	1
cg14429209	10	26509505	GAD2;GAD2	S_Shelf	----	2.44486e-63	----	1	0	0	0
cg24129222	2	74643251	C2orf81	Island	----	2.59111e-63	++++	1	0	0	1
cg12282311	2	95830943	ZNF2;ZNF2	N_Shore	----	3.08263e-63	+-+-	1	0	0	1
cg07939626	6	30853073	DDR1;DDR1	S_Shore	----	3.47251e-63	-++-	1	0	0	0
cg20328456	6	32121113	PPT2;PPT2;PRRT1	N_Shore	----	3.50858e-63	----	1	0	0	0
cg01761236	14	102990251			----	3.65614e-63	++++	1	0	0	0
cg26480889	2	118942960		N_Shore	----	4.04963e-63	-+--	1	0	0	0
cg04284140	7	44163975	POLD2;POLD2	S_Shore	----	4.24637e-63	++-+	1	0	0	1
cg27562948	7	155283424		N_Shore	----	4.27588e-63	-+-+	1	0	0	0
cg05644480	19	45418020	APOC1		----	4.37425e-63	----	1	0	1	0
cg06366791	1	63249213	ATG4C;ATG4C		----	4.45623e-63	-+-+	1	0	0	1
cg08289525	15	92939006	ST8SIA2	S_Shore	----	4.82676e-63	-+-+	1	0	0	0
cg07811933	7	1361132		N_Shore	----	5.01367e-63	+++-	1	0	1	0
cg27129048	15	92938576	ST8SIA2	S_Shore	----	5.07597e-63	-+-+	1	0	0	0
cg26685752	1	152086692	TCHH	S_Shore	----	5.07925e-63	+--+	1	0	0	1
cg26915952	1	178456270		Island	----	5.14483e-63	-++-	1	0	0	0
cg13871826	1	86045347	CYR61;DDAH1	N_Shore	----	5.35141e-63	----	1	0	0	1
cg00870514	17	29717946	RAB11FIP4	N_Shore	----	5.54815e-63	++++	1	0	0	0
cg03854071	19	19626428	TSSK6;NDUFA13;TSSK6	Island	----	5.65636e-63	+--+	1	0	1	0
cg04330631	6	42018203	TAF8	Island	----	5.91541e-63	+++-	1	0	0	0
cg25664034	7	128469891	FLNC;FLNC	N_Shore	----	6.29578e-63	----	0.579736	0	0	0
cg12134349	8	142264816		S_Shore	++++	6.52531e-63	-+-+	1	0	0	0
cg07903237	1	221064388		N_Shore	----	7.21063e-63	----	1	0	0	0
cg14476334	1	1100557		Island	----	7.26637e-63	+-+-	1	0	1	0
cg02840199	16	4165257	ADCY9	Island	----	7.35163e-63	++++	0.0792874	0	0	0
cg25844211	1	229761456	URB2;TAF5L;TAF5L	Island	----	7.41065e-63	++++	1	0	0	0
cg19622474	5	37835784	GDNF;GDNF;GDNF	N_Shore	----	8.10581e-63	++++	0.0231075	0	0	0
cg06397161	22	39760059	SYNGR1;SYNGR1;SYNGR1		----	9.28955e-63	--++	1	0	0	0
cg17063840	15	40649930	DISP2	N_Shore	----	1.04766e-62	+-++	1	0	0	0
cg06692785	1	180882681	KIAA1614	S_Shore	----	1.05913e-62	++-+	1	0	0	1
cg23812775	10	48416899	GDF2	S_Shelf	----	1.10045e-62	+-+-	1	0	1	0
cg19015086	22	30817820	SEC14L2	N_Shore	++++	1.16964e-62	----	0.254618	0	0	0
cg00083790	12	132944010			++++	1.22997e-62	++++	0.412177	0	0	0
cg03430597	9	137660514	COL5A1	Island	----	1.26801e-62	--++	1	0	0	0
cg13318241	6	3455537	SLC22A23	N_Shore	----	1.3267e-62	-+--	1	0	1	0
cg03755115	11	76858729	MYO7A;MYO7A;MYO7A	Island	----	1.4536e-62	----	1	0	0	1
cg26511972	6	29796591	HLA-G	Island	----	1.54706e-62	+++-	1	0	0	0
cg14479947	15	40544427	PAK6;C15orf56;PAK6;PAK6	Island	----	1.59493e-62	++++	1	0	0	0
cg15413523	5	133451625	TCF7;TCF7;TCF7;TCF7;TCF7;TCF7;TCF7;TCF7;TCF7;TCF7	S_Shore	----	1.76905e-62	-+++	1	0	0	0
cg00760646	17	4643865	ZMYND15;CXCL16;ZMYND15;CXCL16	S_Shore	----	1.8425e-62	+-+-	1	0	0	0
cg18075691	19	58566643		N_Shelf	++++	1.89595e-62	--+-	1	0	0	1
cg08134856	1	26233709	STMN1;STMN1;STMN1;STMN1	S_Shore	----	1.9212e-62	-+-+	1	0	0	1
cg05778996	10	103347983	POLL;RP11-529I10.4	Island	++++	1.95103e-62	+++-	1	0	0	0
cg04007302	15	101718893	CHSY1		++++	1.96743e-62	-+--	1	0	0	0
cg08039751	1	2424656	PLCH2		++++	1.99825e-62	--+-	0.365942	0	0	1
cg26874229	2	105853672		Island	----	2.13302e-62	-+++	1	0	0	0
cg20544552	11	85393693			----	2.19106e-62	-+++	1	0	0	0
cg08358943	17	44889584	WNT3		----	2.33075e-62	+-+-	1	0	0	0
cg18210365	15	65066710	RBPMS2	N_Shore	----	2.36485e-62	+---	1	0	0	0
cg23965590	11	119133451	CBL		++++	2.79965e-62	+---	1	0	0	0
cg27541317	1	149871625	BOLA1	Island	----	2.83802e-62	++++	1	0	0	0
cg03130180	6	30312857	RPP21	Island	----	2.88163e-62	+-++	1	0	0	1
cg04231050	3	133191297	BFSP2		----	3.14986e-62	-+++	1	0	0	0
cg25173405	17	45401733	C17orf57	S_Shore	----	3.25413e-62	-+++	1	0	0	0
cg06361845	9	136074886		N_Shore	++++	3.37086e-62	++-+	1	0	0	1
cg00971810	16	33952528			----	3.40693e-62	-+++	0.000206351	0	0	0
cg16616918	17	1686627	SMYD4		----	3.59384e-62	-+-+	1	0	0	0
cg14718065	2	131010763		Island	++++	3.6627e-62	++++	1	0	0	0
cg18753928	3	113234510	CCDC52	S_Shore	----	4.15128e-62	-+-+	1	0	0	1
cg17378342	5	149546331	CDX1	Island	----	4.26277e-62	++++	1	0	0	1
cg25060890	1	213224164	RPS6KC1;RPS6KC1	N_Shore	----	4.49558e-62	----	1	0	0	0
cg12866656	14	88791864	KCNK10	N_Shore	----	4.65953e-62	-+-+	1	0	0	0
cg05490519	16	2908934	PRSS22	S_Shore	++++	4.79725e-62	--+-	1	0	0	0
cg25122233	12	54412506	HOXC4;HOXC5;HOXC6	N_Shore	----	5.37436e-62	++--	1	0	0	1
cg11748187	10	114713108	TCF7L2;TCF7L2;TCF7L2;TCF7L2;TCF7L2;TCF7L2	S_Shore	++++	5.57766e-62	++-+	1	0	0	0
cg07164191	5	177413628		S_Shore	----	5.59406e-62	++-+	1	0	1	1
cg03507326	16	2801952	LOC100128788;SRRM2	Island	----	5.72522e-62	++-+	1	0	0	0
cg18824027	14	76781080			----	5.78097e-62	++++	1	0	0	1
cg10517650	3	113235015	CCDC52	S_Shore	----	6.44333e-62	-+-+	1	0	0	1
cg06742440	1	154842717	KCNN3;KCNN3		++++	7.01389e-62	+++-	1	0	0	0
cg02687418	11	85393765			----	7.35491e-62	-++-	1	0	0	1
cg06494199	17	56315810	LPO;LPO;LPO;LPO;LPO		++++	7.72544e-62	++-+	3.91191e-06	0	0	0
cg20398362	17	76228626	LOC283999	S_Shore	----	7.77463e-62	+---	1	0	0	0
cg02009311	17	79886614	LOC92659;MAFG	Island	----	8.1386e-62	-+++	1	0	0	0
cg23233843	4	41878739		N_Shore	----	8.62062e-62	++-+	1	0	1	1
cg23771929	9	132934195	FREQ	N_Shore	----	8.85344e-62	-+++	1	0	0	0
cg18082788	6	149806339	ZC3H12D		----	1.03061e-61	-++-	1	0	0	0
cg05936516	5	114507066	TRIM36;TRIM36	S_Shore	----	1.10504e-61	-+++	1.35064e-36	0	0	0
cg17220161	1	203242601		Island	----	1.11553e-61	--+-	1	0	0	0
cg20911989	17	42989137	GFAP;GFAP	Island	----	1.16177e-61	++++	1	0	0	0
cg09245003	17	695428	RNMTL1		++++	1.3431e-61	++-+	1	0	0	0
cg26046136	20	45526613	EYA2;EYA2	S_Shelf	----	1.3654e-61	--++	1	0	0	0
cg26164577	12	96251788	SNRPF	N_Shore	----	1.41294e-61	++--	1	0	0	1
cg14357089	10	18550033	CACNB2;CACNB2;CACNB2;CACNB2;CACNB2;CACNB2;CACNB2;CACNB2		----	1.52968e-61	--++	1	0	0	0
cg00404923	4	184882211	STOX2		++++	1.66576e-61	+---	1	0	0	0
cg25542319	5	112540429	MCC;MCC		++++	1.67691e-61	++-+	1	0	0	0
cg12906381	22	32599516	RFPL2;RFPL2;RFPL2		++++	1.74905e-61	++++	1	0	0	1
cg03223580	12	76742630	BBS10	S_Shore	----	2.03695e-61	++-+	1	0	0	0
cg00176210	8	41654967	ANK1;ANK1;ANK1;ANK1;ANK1	Island	----	2.04514e-61	++++	0.0296262	0	0	0
cg04065210	7	35074628	DPY19L1	N_Shore	++++	2.05629e-61	-+--	1	0	0	0
cg17223846	19	3480363	C19orf77	N_Shore	++++	2.22451e-61	++--	1	0	0	0
cg06016427	4	71862187	DCK	S_Shelf	++++	2.51602e-61	---+	1	0	0	0
cg14354168	6	1619134		Island	----	2.52946e-61	++-+	1	0	0	1
cg00521048	13	50159798	RCBTB1	Island	----	2.61898e-61	+++-	1	0	0	0
cg16931068	20	139680	DEFB127		++++	2.79178e-61	+---	1	0	1	1
cg10448227	16	2892809	TMPRSS8	Island	++++	2.80588e-61	+++-	1	0	0	1
cg22502001	1	2360018		Island	----	3.08493e-61	++++	1	0	0	0
cg01806972	11	66314378	ACTN3;ZDHHC24	Island	----	3.24364e-61	-+++	2.60225e-07	0	0	0
cg15305511	4	5712676	EVC2;EVC	N_Shore	----	3.59056e-61	----	0.0214155	0	0	0
cg07112210	17	74864065	MGAT5B	N_Shore	----	3.59056e-61	+-+-	1	0	0	0
cg13416866	9	140175679	C9orf167	Island	++++	3.62335e-61	-+++	1	0	0	0
cg19978550	2	158453812	ACVR1C;ACVR1C;ACVR1C;ACVR1C	Island	----	3.7873e-61	+++-	1	0	0	0
cg08199758	16	3062426	CLDN9	N_Shore	----	4.2726e-61	----	0.272227	0	0	0
cg00009053	11	61283865	SYT7	Island	----	4.29556e-61	-+--	1	0	0	0
cg06117341	16	3062653	CLDN9;CLDN9	N_Shore	----	4.29556e-61	-+--	1	0	0	0
cg19103429	7	92460784	CDK6;CDK6	N_Shore	++++	4.29883e-61	+---	1	0	0	0
cg21333338	17	2808456	RAP1GAP2;RAP1GAP2		----	4.31851e-61	+---	1	0	0	0
cg14315430	12	57915618	MBD6;DDIT3	N_Shore	----	4.39393e-61	++++	1	0	0	0
cg23562538	8	144798877	MAPK15	Island	----	4.69232e-61	++-+	1	0	1	1
cg14441480	6	32729500	HLA-DQB2	Island	----	4.75462e-61	++++	1	0	0	0
cg09650488	7	1687007		Island	----	4.89562e-61	+-+-	1	0	0	1
cg00533649	19	42431930		Island	----	5.3055e-61	+---	1	0	0	0
cg17570948	12	49726661	C1QL4	Island	----	5.36453e-61	++++	1	0	0	0
cg05672223	2	43328033		Island	----	5.38748e-61	+---	1	0	0	0
cg01434559	11	8290939		S_Shore	----	5.6662e-61	++++	1	0	0	1
cg03433241	1	166853278		Island	----	5.71211e-61	----	1	0	0	0
cg03890167	1	203242638		Island	----	6.95159e-61	--+-	1	0	0	0
cg08422645	1	210446261			----	7.96809e-61	----	1	0	0	0
cg13063614	11	119020779	ABCG4;ABCG4	Island	----	8.52553e-61	++++	1	0	0	0
cg04293602	11	65553660	OVOL1	N_Shore	----	8.75178e-61	++++	1	0	0	0
cg10170269	20	62256006	GMEB2	N_Shore	++++	8.78457e-61	+-++	0.0238289	0	0	0
cg09805271	11	5010562	MMP26		++++	9.50597e-61	----	1	0	0	0
cg08854834	21	30517941	C21orf7		++++	1.05454e-60	----	1	0	0	0
cg06380356	2	467891		Island	----	1.08569e-60	-+++	1	0	0	1
cg26145670	6	28554497	SCAND3;SCAND3	N_Shore	----	1.1621e-60	+--+	1	0	0	0
cg05467012	3	12595696		N_Shelf	----	1.36376e-60	++++	1	0	0	0
cg14285533	7	63386328		N_Shore	++++	1.37228e-60	++++	1	0	1	0
cg27413421	19	7926591	EVI5L;EVI5L	Island	----	1.43622e-60	++-+	1	0	0	0
cg00513208	10	12085641	UPF2;UPF2	S_Shore	----	1.84447e-60	++-+	1	1	0	1
cg23323671	1	26233623	STMN1;STMN1;STMN1;STMN1	Island	----	1.9025e-60	++++	0.768937	0	0	0
cg08770961	16	66956122	RRAD;RRAD	Island	----	1.91201e-60	++++	0.0172937	0	0	0
cg13474370	15	65068885	RBPMS2	S_Shore	----	2.01366e-60	+++-	1	0	0	0
cg05895034	16	2908892	PRSS22	S_Shore	++++	2.08548e-60	--+-	1	0	0	1
cg02338222	9	132245400		Island	----	2.37993e-60	----	1	0	0	0
cg20299697	3	138069423	MRAS;MRAS	S_Shore	++++	2.49241e-60	+-+-	1	0	0	0
cg26332114	19	57742260	AURKC;AURKC;AURKC	Island	----	2.5006e-60	++++	1	0	0	0
cg26725862	10	112404774	RBM20	S_Shore	----	2.82392e-60	-+++	1	0	0	1
cg15452204	5	149546471	CDX1	Island	----	2.84031e-60	+--+	1	0	0	1
cg27405731	7	101571203	CUX1;CUX1;CUX1		++++	3.26626e-60	++++	1	0	0	0
cg01161644	16	28270238		N_Shore	----	3.30856e-60	+-+-	1	0	0	0
cg17153082	20	3145597	ProSAPiP1	Island	----	3.5053e-60	-+++	1	0	1	0
cg17108141	1	86044230	DDAH1	S_Shore	----	3.56105e-60	----	1	0	0	0
cg00760439	20	43940872	RBPJL	Island	----	3.725e-60	--++	1	0	0	1
cg09945151	14	75594005	NEK9	Island	----	3.83321e-60	----	1	0	0	1
cg08051713	14	57311640	OTX2OS1		----	3.8824e-60	++++	1	0	0	1
cg12097883	17	62774939	LOC146880;LOC146880	Island	----	4.10865e-60	-+++	0.171232	0	0	0
cg07647651	6	42878931		N_Shore	----	4.81365e-60	++-+	1	0	0	0
cg04045009	19	55667663	TNNI3	Island	++++	4.83332e-60	++++	1	0	0	0
cg05414754	12	41582067	PDZRN4	N_Shore	----	5.39732e-60	-+-+	1	0	0	0
cg18435832	15	45671155	LOC145663;GATM	S_Shore	----	5.53832e-60	-+++	1	0	0	1
cg22496683	4	155702610	RBM46	Island	----	6.33185e-60	-+++	1	0	0	0
cg02362978	17	9550137	USP43	S_Shore	----	6.40398e-60	----	1	0	0	1
cg23936402	6	28499703	GPX5;GPX5		----	6.60073e-60	+--+	1	0	0	0
cg14864167	8	66751182	PDE7A	N_Shelf	++++	8.00416e-60	-+--	1	0	0	0
cg22144900	6	88757358	SPACA1	Island	----	9.09608e-60	++++	1	0	0	1
cg18766864	22	38863605	KDELR3;KDELR3	N_Shore	----	9.30922e-60	+++-	1	0	0	0
cg13099847	1	33546750	ADC;ADC	Island	----	9.58466e-60	+++-	1	0	0	0
cg15399533	6	108497995	NR2E1	Island	----	1.0329e-59	++++	0.0874851	0	0	0
cg12367539	5	178956838		N_Shore	++++	1.05651e-59	----	1	0	0	0
cg07807757	7	50894570			++++	1.06602e-59	+-+-	1	0	0	0
cg03123541	1	95699097	RWDD3;RWDD3	N_Shore	----	1.09356e-59	----	1	0	1	0
cg14434213	8	38508780		S_Shore	----	1.14734e-59	++-+	1	0	0	1
cg24460126	1	179713828	FAM163A	Island	----	1.18406e-59	++++	1	0	0	0
cg10115987	2	220375548		N_Shelf	----	1.21817e-59	-+++	1	0	0	0
cg16595288	10	43698931	RASGEF1A	S_Shore	----	1.39819e-59	+++-	1	0	0	1
cg20003893	8	144489567		Island	----	1.43819e-59	----	1	0	0	1
cg07668501	16	86766712			----	1.6451e-59	--+-	1	0	0	0
cg22860172	1	3099917	PRDM16;PRDM16	N_Shelf	----	1.90939e-59	+--+	1	0	1	0
cg09678939	6	149806081	ZC3H12D;ZC3H12D		----	2.00612e-59	----	1	0	0	0
cg17317859	14	75231455	YLPM1	S_Shore	++++	2.22615e-59	----	0.44136	0	0	0
cg13372293	2	203878778	NBEAL1	N_Shore	----	2.67243e-59	-++-	1	0	0	1
cg05194362	2	114036444	PAX8;PAX8;PAX8;PAX8;PAX8;PAX8;PAX8;LOC440839;PAX8;PAX8;PAX8	S_Shore	----	2.92918e-59	----	1	0	0	0
cg16813662	13	100650387		Island	----	2.99574e-59	-+-+	1	0	0	1
cg02612650	6	26195910		N_Shore	++++	3.26954e-59	---+	1	0	1	0
cg27527630	7	29923538	WIPF3	N_Shore	----	3.28233e-59	-++-	1	0	0	0
cg15655495	12	38532458		Island	++++	3.32496e-59	-+++	0.914527	0	0	0
cg13029400	3	141087190	ZBTB38		----	3.35119e-59	----	1	0	0	0
cg15595918	6	32047410	TNXB	S_Shore	++++	3.91191e-59	+--+	1	0	0	0
cg07978145	11	74109510	PGM2L1	Island	----	4.007e-59	++++	1	0	0	0
cg10364249	1	27901698	AHDC1	Island	++++	4.29228e-59	-+-+	1	0	0	0
cg07444554	5	139252771	NRG2;NRG2;NRG2;NRG2		----	4.46279e-59	---+	1	0	1	0
cg20220242	21	30392188	RWDD2B	S_Shore	----	4.61034e-59	++++	1	0	0	1
cg01235820	20	642782	SCRT2	Island	----	5.13171e-59	-+++	1	0	1	0
cg04565337	14	38071768		S_Shelf	----	5.45634e-59	++++	0.0224517	0	1	1
cg17200137	10	48416896	GDF2	S_Shelf	----	5.63341e-59	++++	1	0	1	0
cg18678107	14	100130465	HHIPL1;HHIPL1	S_Shelf	----	5.85966e-59	-+-+	1	0	0	0
cg26405475	3	156324038			----	5.86294e-59	-+++	0.0287442	0	0	0
cg21542881	19	39754717		N_Shore	----	6.43022e-59	-++-	1	0	0	1
cg05062676	2	38304725	CYP1B1	S_Shore	----	6.4958e-59	++++	1	0	0	0
cg15353597	2	102313163	MAP4K4;MAP4K4;MAP4K4	N_Shore	----	6.6827e-59	-+++	1	0	0	0
cg22541001	4	42402470	SHISA3	S_Shore	----	6.81387e-59	----	1	0	0	0
cg18771553	19	6710827	C3	Island	----	6.83682e-59	++++	1	0	0	1
cg17643699	12	27091484	FGFR1OP2;C12orf11;FGFR1OP2	Island	----	7.54509e-59	+++-	1	0	0	0
cg01124132	22	32599511	RFPL2;RFPL2;RFPL2		++++	7.85988e-59	-+++	1	0	0	1
cg01084740	14	61748243	TMEM30B;TMEM30B	S_Shore	----	7.94842e-59	---+	1	0	0	1
cg11888982	8	116231420			++++	8.437e-59	+-++	1	0	1	0
cg04420723	6	27439931	ZNF184	N_Shore	++++	8.75834e-59	----	1	0	0	0
cg06759845	1	156460474	MEF2D		++++	9.12232e-59	++++	0.0758772	0	0	0
cg07581811	3	184491461			----	9.85355e-59	-+--	1	0	0	0
cg22249932	17	4545721	ALOX15	S_Shore	----	1.03224e-58	++++	1	0	0	0
cg22443940	6	122144734			++++	1.04143e-58	+-++	1	0	0	0
cg04656330	2	219188197	PNKD;PNKD	Island	----	1.24833e-58	+++-	1	0	0	0
cg21680449	20	34206330	SPAG4	N_Shore	----	1.54673e-58	---+	1	0	0	0
cg04579398	19	36485360	SDHAF1	Island	----	1.62838e-58	++++	0.0884688	0	0	0
cg22683036	1	63249209	ATG4C;ATG4C		----	1.63264e-58	-+-+	1	0	0	1
cg05324407	16	86987828			----	1.80413e-58	++++	0.0139065	0	0	0
cg19273694	2	24233923	MFSD2B	S_Shore	----	1.90218e-58	-++-	1	0	0	0
cg02096492	8	67782943	C8orf45;C8orf45;C8orf45		----	2.06121e-58	+++-	1	0	0	0
cg17198994	3	192129276	FGF12	S_Shore	----	2.27697e-58	+---	1	0	0	0
cg01432120	2	129494728		Island	----	2.32714e-58	++++	1	0	0	0
cg24082680	1	63249199	ATG4C;ATG4C		----	2.39633e-58	-+-+	1	0	0	1
cg25802888	19	57742112	AURKC;AURKC;AURKC	Island	----	2.60029e-58	++++	1	0	0	0
cg25823085	7	87105416	ABCB4;ABCB4;ABCB4	S_Shore	----	2.75342e-58	-++-	1	0	1	0
cg08058156	17	56356852	MPO	Island	----	2.83638e-58	-+++	1	0	0	0
cg00462007	4	582634		Island	++++	2.95901e-58	+--+	1	0	0	0
cg20630560	1	228395858	OBSCN;OBSCN	N_Shelf	----	3.04099e-58	++++	1	0	1	0
cg18355337	19	55549722	GP6;GP6		----	3.10657e-58	----	0.18002	0	0	0
cg07524679	2	74742593	TLX2	Island	----	3.1892e-58	-+++	4.01356e-06	0	0	0
cg04896168	1	86968543			----	3.19281e-58	++-+	1	0	0	1
cg07422940	16	54546090			----	3.38398e-58	+--+	1	0	1	0
cg13742532	3	42850848	CCBP2		++++	3.40037e-58	----	1	0	0	0
cg26453670	20	55966053	RBM38;RBM38	N_Shore	----	3.61351e-58	-+--	1	0	0	1
cg21565496	13	40762150			++++	3.62335e-58	++++	1	0	1	0
cg10321156	11	63687223		S_Shore	----	3.66926e-58	-+++	1	0	0	0
cg19520710	12	57915613	MBD6;DDIT3	N_Shore	----	3.725e-58	++++	1	0	1	0
cg06434451	1	32802291	MARCKSL1	S_Shore	----	3.99388e-58	+-+-	1	0	1	1
cg03695236	7	157369121	PTPRN2;PTPRN2;PTPRN2	Island	++++	4.09881e-58	++++	1	0	0	0
cg17884383	19	45848320	KLC3	N_Shore	----	4.49886e-58	+---	0.687289	0	0	0
cg05374025	19	55549746	GP6;GP6		----	4.90874e-58	-+--	1	0	0	0
cg14544289	14	78051204	SPTLC2		----	4.99727e-58	--+-	1	0	0	0
cg04396765	10	76585478	MYST4	Island	----	5.06285e-58	+++-	1	0	0	1
cg10289177	7	150748069	ACCN3;ACCN3;ACCN3	Island	----	5.24648e-58	++-+	1	0	1	0
cg10582827	6	28584464		S_Shore	----	5.39404e-58	-+++	0.0856488	0	1	1
cg03851398	10	135171564	C10orf125;C10orf125	Island	----	5.50225e-58	+++-	1	0	0	0
cg05575921	5	373378	AHRR	N_Shore	----	5.58422e-58	--+-	1	0	0	0
cg21300318	19	4769206	MIR7-3;C19orf30		++++	5.6039e-58	--++	1	0	0	0
cg25975485	12	54446537	HOXC4;HOXC4	N_Shore	----	5.90229e-58	++-+	1	0	0	1
cg01311995	16	85205741		S_Shore	----	6.20396e-58	--++	1	0	0	0
cg02798848	7	155289972			----	6.52531e-58	++++	1	0	0	1
cg16001335	22	50219912	BRD1	N_Shore	++++	6.60073e-58	----	1	0	0	0
cg04415780	1	156819191	NTRK1;INSRR	Island	----	6.73189e-58	++++	0.0233272	0	0	1
cg18750087	10	43522143			----	7.64019e-58	----	1	0	0	0
cg09938479	1	178455912		Island	----	7.80742e-58	+++-	1	0	0	0
cg06913337	16	88590404	ZFPM1	Island	----	7.92874e-58	--+-	1	0	0	0
cg22117172	7	91764530	CYP51A1;CYP51A1	S_Shore	----	8.22058e-58	++++	1	0	0	0
cg25633271	17	36732171	SRCIN1	N_Shelf	----	8.40748e-58	----	1	0	0	1
cg10366439	2	110970249	NCRNA00116	S_Shore	----	9.54859e-58	----	1	0	0	1
cg02524475	4	145566595	HHIP	Island	----	9.68959e-58	-+++	1	0	1	0
cg11566244	11	67351786	GSTP1	Island	++++	9.71255e-58	-+++	1	0	0	0
cg08061745	19	51231557		N_Shore	----	9.71583e-58	++++	0.0107422	0	1	1
cg20245439	20	3053196		S_Shore	----	1.01552e-57	-+-+	1	0	0	1
cg23258188	1	3075846	PRDM16;PRDM16	S_Shelf	----	1.05192e-57	+-++	1.16341e-09	0	0	0
cg14200569	1	3051925	PRDM16;PRDM16		----	1.09651e-57	-+++	1.9389e-11	0	0	0
cg01604592	1	44679056	DMAP1;DMAP1;DMAP1	Island	----	1.11029e-57	+-+-	1	0	0	1
cg13934236	22	43507609	BIK	Island	----	1.14472e-57	----	1	0	0	0
cg27225309	2	213969340	IKZF2;IKZF2		----	1.1716e-57	-+-+	1	0	0	0
cg17515480	19	48049039	ZNF541	Island	----	1.18866e-57	++-+	1	0	0	1
cg11970806	17	56066485	VEZF1	S_Shore	----	1.46311e-57	----	1	0	0	0
cg02793162	15	68958534	CORO2B		++++	1.47623e-57	-+-+	1	0	0	0
cg23628563	7	112262597			----	1.51689e-57	-+++	1	0	0	0
cg21179831	6	31508137	BAT1;BAT1	N_Shore	++++	1.57165e-57	----	0.0749591	0	0	0
cg22576236	4	1166933	LOC100130872-SPON2;SPON2;SPON2;SPON2	S_Shore	----	1.57722e-57	----	1	0	0	0
cg22866426	21	36263347	RUNX1	Island	++++	1.67789e-57	-+++	1	0	0	0
cg24943627	18	35147826		S_Shore	----	1.77495e-57	+++-	1	0	0	0
cg10690919	17	48912545	WFIKKN2		----	1.8966e-57	--+-	1	0	0	1
cg04782146	16	85112370	KIAA0513		++++	1.93562e-57	+--+	1	0	0	0
cg03405139	2	69614107	GFPT1	N_Shore	----	2.28648e-57	+++-	0.500711	0	0	0
cg21420674	1	2713926		N_Shelf	++++	2.34714e-57	-+--	1	0	1	0
cg11419931	17	46570504		Island	----	2.62652e-57	++++	1	0	0	0
cg25042226	2	114036571	PAX8;PAX8;PAX8;LOC440839;PAX8;PAX8	S_Shore	----	2.73178e-57	+--+	1	0	0	1
cg22162848	17	73717736	ITGB4;ITGB4	Island	----	2.98066e-57	-+++	1	0	0	0
cg26530345	2	220312410	SPEG	N_Shore	----	3.0905e-57	+---	1	0	0	1
cg12666727	1	42128487	HIVEP3;HIVEP3	Island	++++	3.12362e-57	++++	1	0	0	0
cg27097386	15	96400610			++++	3.36431e-57	----	1	0	1	1
cg04873053	1	53935918			----	3.44628e-57	--+-	1	0	1	0
cg03551401	8	132051228	ADCY8	N_Shore	----	3.56105e-57	---+	1	0	0	0
cg13588403	14	73209128	DPF3		----	3.77747e-57	++++	1	0	0	0
cg11641006	2	235213874			++++	3.78402e-57	++++	0.425293	0	0	0
cg08122386	6	26195954		N_Shore	++++	4.2103e-57	-+-+	1	0	1	0
cg09163442	7	54827431	SEC61G;SEC61G	S_Shore	----	4.45623e-57	-++-	1	0	0	1
cg07077978	1	38508155		N_Shore	----	4.50869e-57	----	1	0	0	0
cg13265524	2	202484246	ALS2CR11;ALS2CR11;ALS2CR11;ALS2CR11	S_Shore	----	4.59067e-57	++++	0.0549569	0	0	0
cg25628310	3	57543243	PDE12	Island	++++	4.74151e-57	-+--	1	0	0	0
cg13266496	6	110720918	DDO;DDO	N_Shore	----	4.75462e-57	++++	1	0	0	0
cg26144569	2	38304804	CYP1B1	S_Shore	----	5.06613e-57	-+-+	1	0	0	1
cg17887478	17	7486551	MPDU1;MPDU1	Island	----	5.14155e-57	++++	1	0	0	0
cg13471599	12	120835778		Island	----	5.47273e-57	-+++	1	0	1	1
cg04010915	12	110547053			++++	5.62029e-57	+--+	1	0	0	0
cg10882226	10	50977288		S_Shore	----	6.05968e-57	++++	1	0	1	1
cg26201213	10	131265796	MGMT	S_Shore	----	6.23675e-57	-+++	1	0	0	0
cg03437912	13	29232327	POMP	N_Shore	++++	6.29578e-57	----	1	0	0	0
cg11949060	12	49726761	C1QL4	Island	----	6.29578e-57	-+++	1	0	0	0
cg04024827	12	54454163	FLJ12825	N_Shore	----	6.51219e-57	++++	1	0	1	1
cg06226150	20	62369956	SLC2A4RG;LIME1	Island	----	6.61712e-57	+---	2.8813e-24	0	0	0
cg08560952	16	50278816		N_Shore	----	6.75156e-57	----	0.181889	0	0	0
cg10081469	14	61748336	TMEM30B;TMEM30B	S_Shore	----	7.12538e-57	++++	0.506941	0	1	0
cg19259111	11	46478214	AMBRA1		++++	7.61723e-57	-+-+	1	0	0	0
cg00632657	10	27703336	PTCHD3	Island	----	7.62379e-57	-+++	1	0	0	1
cg11946666	1	3247595	PRDM16;PRDM16		----	7.9353e-57	+---	1	0	0	0
cg03946324	10	14995581	DCLRE1C;DCLRE1C;DCLRE1C;DCLRE1C	N_Shore	----	8.08614e-57	----	1	0	0	0
cg21512370	13	48990327	LPAR6;LPAR6;RB1		++++	8.11893e-57	-+++	1	0	0	0
cg13680337	10	71626580	COL13A1;COL13A1;COL13A1;COL13A1;COL13A1;COL13A1;COL13A1;COL13A1;COL13A1;COL13A1;COL13A1;COL13A1;COL13A1;COL13A1;COL13A1;COL13A1;COL13A1;COL13A1;COL13A1;COL13A1		----	9.06329e-57	+---	0.0125719	0	0	1
cg00621084	2	191400610	TMEM194B	S_Shore	++++	9.16822e-57	----	1	0	0	0
cg01396774	2	218299024	DIRC3		++++	1.12996e-56	++--	1	0	0	0
cg01709689	7	1452073		N_Shore	----	1.23161e-56	+-++	1	0	1	1
cg15344192	2	121347210		S_Shore	++++	1.33228e-56	----	1	0	0	0
cg15780361	2	202484098	ALS2CR11;ALS2CR11;ALS2CR11;ALS2CR11	S_Shore	----	1.33916e-56	++-+	1	0	0	0
cg21116077	1	10920786			----	1.34539e-56	+-++	1	0	0	0
cg04362002	5	23506738	PRDM9		----	1.51197e-56	----	1	0	0	0
cg17087669	6	36099123	MAPK13	S_Shore	----	1.7638e-56	+---	1	1	0	0
cg17321385	2	132429793		N_Shore	----	1.80708e-56	--++	1	0	0	0
cg08835755	4	1514317		Island	++++	1.81725e-56	++++	1	0	0	0
cg23224666	6	127796287	C6orf174	Island	----	1.88545e-56	+--+	1	0	0	1
cg08110610	2	234216147	SAG		++++	1.97399e-56	+-+-	1	0	0	0
cg20741105	7	43686889	C7orf44		++++	2.40879e-56	+--+	1	0	0	0
cg09443102	21	46824976	COL18A1	Island	----	2.69767e-56	+++-	5.94164e-13	0	0	0
cg00765128	6	28226905	NKAPL	N_Shore	----	2.69931e-56	-+++	1.02798e-06	0	0	0
cg06662568	19	13266738		Island	----	2.87146e-56	-++-	1	0	0	0
cg17288892	5	178956874		N_Shore	++++	2.88294e-56	++-+	0.00897148	0	0	0
cg12254611	19	47249193	STRN4;STRN4;FKRP;FKRP	Island	----	3.20134e-56	+++-	1	0	0	0
cg22479161	5	17120060			----	3.26265e-56	+---	0.276424	0	0	0
cg04321267	16	219155		N_Shelf	----	3.28889e-56	++-+	1	0	0	1
cg07092985	8	55533887	RP1	Island	----	3.29872e-56	+--+	1	0	0	0
cg23851167	20	62131189	EEF1A2	S_Shelf	----	3.50858e-56	-+--	1	0	0	0
cg06255037	22	41634447	CHADL	Island	----	3.55121e-56	----	1	0	0	1
cg07830652	13	76123904	UCHL3	Island	----	3.82337e-56	+++-	0.33807	0	0	0
cg20710603	17	1227932		S_Shore	++++	3.89551e-56	+--+	1	0	0	1
cg00855262	19	21649132		S_Shelf	++++	4.14472e-56	++-+	1	0	0	1
cg04085339	1	174967695	CACYBP;CACYBP	N_Shore	----	4.51197e-56	-+-+	1	0	0	1
cg27296119	16	86766828			----	4.92841e-56	-+++	1	0	0	0
cg12424921	11	63828039	MACROD1		----	5.12516e-56	-+-+	3.9906e-05	0	0	0
cg18921954	5	33938909		S_Shore	----	5.24648e-56	-+++	1	0	0	0
cg14748380	1	179713788	FAM163A	Island	----	5.29894e-56	-++-	1	0	0	0
cg24530147	3	138763894	PRR23C	Island	----	5.40387e-56	++-+	1	0	0	0
cg25819879	2	3622620	RPS7	N_Shore	----	5.52192e-56	----	0.325872	0	0	0
cg08781728	8	21882587	NPM2	Island	----	5.70227e-56	-+++	1	0	0	0
cg25201363	4	3534845	LRPAP1	S_Shore	----	6.30889e-56	++++	0.2416	0	0	0
cg09019635	2	164800141			++++	6.37775e-56	---+	1	0	0	0
cg02963556	12	132588637	EP400NL		++++	6.55482e-56	+++-	1	0	0	0
cg17445936	1	3090345	PRDM16;PRDM16		----	6.97126e-56	-+++	1	0	0	0
cg22252041	6	34724756	SNRPC;SNRPC	N_Shore	----	7.29917e-56	-++-	1	0	0	0
cg04231094	11	75139680	KLHL35	Island	----	7.45656e-56	++++	1	0	0	0
cg05235525	14	102687624	WDR20		++++	7.69921e-56	--++	1	0	0	0
cg04144938	19	7565554	C19orf45	N_Shore	----	8.36158e-56	---+	1	0	0	0
cg11797159	5	131991491		N_Shore	----	8.51569e-56	--+-	1	0	0	0
cg00945507	7	54827677	SEC61G;SEC61G	S_Shore	----	8.8436e-56	++-+	1	0	0	0
cg22795769	17	1396123	MYO1C;MYO1C	S_Shore	----	9.51908e-56	+---	1	0	0	0
cg14431573	15	52405019	BCL2L10	S_Shore	----	1.03749e-55	-+-+	0.119423	0	1	1
cg24713343	1	52082692	OSBPL9;OSBPL9;OSBPL9;OSBPL9		----	1.09094e-55	+-+-	1	0	0	0
cg07832006	1	115397374	SYCP1	N_Shore	----	1.09356e-55	++++	0.181725	0	0	0
cg21790715	2	121776314			----	1.09881e-55	-+++	3.41021e-06	0	0	0
cg06407470	5	75379270	SV2C	Island	----	1.12111e-55	+++-	1	0	0	0
cg26686068	4	7700686	SORCS2		----	1.15619e-55	+--+	1	0	0	0
cg14971320	10	43699070	RASGEF1A	S_Shore	----	1.17718e-55	-++-	1	0	0	0
cg16596889	1	156891327	C1orf92	S_Shore	----	1.17947e-55	----	0.265636	0	0	0
cg26250086	1	6830972			++++	1.23292e-55	-+-+	1	0	0	0
cg01431482	1	2989085	PRDM16;PRDM16	N_Shore	----	1.30572e-55	-+--	0.00172183	0	1	0
cg10869879	12	56474569	ERBB3;ERBB3	S_Shore	----	1.34212e-55	+++-	1	0	0	0
cg01542384	3	50284305	GNAI2;GNAI2		++++	1.36376e-55	-+++	1	0	0	0
cg18132363	6	166260572			++++	1.46114e-55	-+-+	1	0	0	0
cg03417884	18	11751413	GNAL;GNAL;GNAL	Island	----	1.46475e-55	++++	1	0	0	0
cg09360974	11	66496490		S_Shore	----	1.59001e-55	--+-	1	0	0	0
cg19939077	10	81108060	PPIF	S_Shore	++++	1.71494e-55	+---	1	0	0	0
cg24717159	15	50474163	SLC27A2;SLC27A2	N_Shore	----	2.0822e-55	--+-	1	0	0	0
cg07370221	12	132904796	GALNT9	N_Shore	++++	2.26648e-55	++++	1	0	0	0
cg12278705	1	86045474	CYR61;DDAH1	N_Shore	----	2.28189e-55	--+-	1	0	0	0
cg17873750	1	116382984	NHLH2;NHLH2;NHLH2	S_Shore	----	2.49995e-55	-+++	1	0	0	1
cg25486386	2	133014663	NCRNA00164;MIR663B	Island	----	2.62029e-55	++++	0.0279769	0	0	0
cg06647693	16	88590340	ZFPM1	Island	----	2.70194e-55	--+-	0.000314199	0	0	0
cg12695465	6	10556147	GCNT2;GCNT2;GCNT2		++++	2.73473e-55	----	1	0	0	0
cg05849319	11	65172370	FRMD8	Island	++++	2.87573e-55	++++	1	0	0	0
cg03111818	12	14927076	H2AFJ;H2AFJ	N_Shore	++++	2.96393e-55	+++-	1	0	1	0
cg01510388	8	65711658	CYP7B1	Island	----	3.09149e-55	++++	0.117652	0	0	0
cg03989273	5	133468435	TCF7;TCF7;TCF7;TCF7;TCF7;TCF7;TCF7		++++	3.09149e-55	+++-	1	0	1	0
cg14374799	8	21882942	NPM2	S_Shore	----	3.34463e-55	----	1	0	0	0
cg17183174	13	76115526		S_Shelf	++++	3.46596e-55	++++	1	0	0	0
cg01420254	6	26195488		N_Shore	++++	3.48235e-55	-+--	1	0	0	0
cg07897069	5	126564606		N_Shore	----	3.48563e-55	---+	1	0	0	1
cg09637273	17	55939387		Island	----	3.71516e-55	--+-	1	1	0	0
cg23797887	11	18477753	LDHAL6A;LDHAL6A;LDHAL6A	Island	----	3.83977e-55	+-++	1	0	0	0
cg14825555	1	27190639	SFN;SFN	N_Shore	++++	3.86272e-55	++-+	1	0	1	0
cg17311587	7	1250088		N_Shore	++++	3.91191e-55	---+	1	0	0	0
cg24476033	19	6710658	C3	Island	----	3.94142e-55	+++-	1	0	0	1
cg20638675	10	45374906			----	4.11193e-55	-++-	1	0	0	0
cg18545771	11	63827879	MACROD1		----	4.42344e-55	-+-+	1	0	0	0
cg11926063	3	128444746	RAB7A	N_Shore	++++	4.54148e-55	-++-	1	0	0	0
cg06671087	9	37033489	PAX5	N_Shore	----	4.64969e-55	++-+	1	0	1	1
cg25318971	20	55837483	BMP7	N_Shore	----	4.65953e-55	++++	1	0	0	1
cg11203293	13	25777762			----	4.71527e-55	+++-	1	0	0	0
cg01403948	19	7661617	KIAA1543;KIAA1543	S_Shore	----	4.89234e-55	-+++	1	0	0	0
cg10714510	6	32729465	HLA-DQB2	Island	----	5.01039e-55	++++	1	0	0	0
cg22122321	4	85407081		S_Shore	----	5.09236e-55	-+-+	1	0	0	0
cg01289343	13	114814401	RASA3	Island	++++	5.34813e-55	-+++	1	0	0	0
cg09846458	19	55972646	ISOC2;ISOC2;ISOC2	N_Shore	++++	5.6662e-55	+-+-	1	0	0	0
cg05927268	14	74769367	ABCD4;ABCD4	Island	----	5.82359e-55	++--	1	0	0	1
cg25341560	19	35530755	SCN1B;HPN;HPN	N_Shore	----	6.07608e-55	-++-	1	0	0	0
cg12494515	4	185935484		N_Shore	----	6.17773e-55	++++	1	0	0	0
cg16755220	16	12070685	RUNDC2A	Island	----	6.27282e-55	+++-	1	0	0	0
cg18294646	5	33937876	RXFP3	Island	----	6.42694e-55	++-+	1	0	0	1
cg23703089	21	45926167	C21orf29	N_Shore	----	6.55482e-55	+---	4.60051e-11	0	0	1
cg16426321	14	93507882	ITPK1;ITPK1;ITPK1		----	6.6368e-55	--++	1	0	1	0
cg10920316	5	137946599			----	6.71877e-55	+---	1	0	0	0
cg17340548	19	46185070	GIPR	Island	----	6.73845e-55	+-+-	1	0	0	1
cg15605704	1	4770676	AJAP1;AJAP1	N_Shore	----	6.83354e-55	+-++	1	0	0	0
cg26719629	11	2163299	IGF2AS;INS-IGF2;IGF2;IGF2;IGF2AS	N_Shore	----	6.83682e-55	-++-	1	0	0	1
cg01468220	16	779026	HAGHL;HAGHL	Island	----	6.90896e-55	++++	0.0248847	0	0	0
cg26985203	11	43903042	ALKBH3	S_Shore	++++	7.56149e-55	+-++	1	0	0	1
cg13703912	9	214268	C9orf66;C9orf66;DOCK8	N_Shore	----	7.57133e-55	+++-	1	0	0	1
cg04857403	1	43473030		Island	----	8.41732e-55	++++	0.558422	0	0	0
cg27426442	6	35181113	SCUBE3	Island	----	9.16494e-55	+-++	1	0	0	1
cg27612019	22	18064052	SLC25A18	Island	----	9.43383e-55	++++	1	0	0	0
cg04118124	1	43231249	LEPRE1;LEPRE1	N_Shore	++++	9.44366e-55	---+	1	0	0	0
cg01001049	16	8995730	USP7		++++	9.50597e-55	---+	1	0	0	0
cg05038268	11	66885281	KDM2A;KDM2A	Island	----	9.61745e-55	-++-	1	0	0	0
cg05168015	5	171880461	SH3PXD2B	N_Shore	----	9.74534e-55	-+--	0.220582	0	0	0
cg06362282	6	33245893	B3GALT4	S_Shore	----	1.1539e-54	----	1	0	0	0
cg18376352	19	18706136	CRLF1	Island	----	1.17128e-54	-+-+	1	0	0	0
cg17480077	1	10895517		N_Shore	----	1.18833e-54	++++	0.557766	0	0	1
cg11106117	5	139491230		N_Shore	----	1.20079e-54	-+++	1.15423e-08	0	0	0
cg11576274	1	146552552		Island	----	1.2808e-54	+++-	1	0	0	0
cg17432513	5	180643653		N_Shore	++++	1.3008e-54	----	1	0	0	1
cg03349950	10	72678728		S_Shore	++++	1.32244e-54	+-+-	1	0	0	1
cg15200801	19	48999042	LMTK3	N_Shore	++++	1.36277e-54	+--+	1	0	0	0
cg00940577	17	28803884	GOSR1;GOSR1;GOSR1	N_Shore	----	1.48639e-54	+---	5.99738e-14	0	0	0
cg14228592	8	145639181	SLC39A4;SLC39A4	Island	++++	1.60772e-54	-+--	1	0	0	1
cg05404005	11	8053420		Island	----	1.63985e-54	++++	1	0	0	0
cg08772003	10	104629869	AS3MT	S_Shore	----	1.81758e-54	++-+	1	0	1	0
cg10860652	17	78194612	SLC26A11;SLC26A11;SLC26A11;SGSH;SLC26A11	Island	----	1.85397e-54	+++-	0.126506	0	0	0
cg22052514	8	142401722		Island	----	1.90283e-54	-+--	1	0	0	0
cg06643849	19	57742421	AURKC;AURKC;AURKC;AURKC;AURKC	Island	----	2.20975e-54	++++	0.343317	0	0	0
cg21561537	6	30654555	KIAA1949;KIAA1949;KIAA1949	Island	----	2.35141e-54	+++-	1	0	0	0
cg08246318	6	42894099		S_Shore	++++	2.70915e-54	--++	1	0	0	0
cg13664588	17	74557494	SNORD1A	S_Shelf	++++	2.73801e-54	+---	1	0	0	0
cg03607728	21	30391630	RWDD2B;RWDD2B	Island	----	3.20363e-54	--+-	1	0	1	0
cg24704476	1	956799	AGRN	S_Shore	----	3.33479e-54	+-+-	1	0	1	0
cg13993914	9	140165710	COBRA1	N_Shore	++++	3.3971e-54	---+	1	0	0	0
cg08930131	5	177811198	COL23A1		----	3.60368e-54	+--+	1	0	0	0
cg21903286	12	42876128	PRICKLE1;PRICKLE1;PRICKLE1;PRICKLE1	N_Shore	----	4.03651e-54	----	0.0384305	0	0	1
cg09075844	5	1245902	SLC6A18	Island	++++	4.22014e-54	++++	1	0	0	1
cg07207669	1	155102388	EFNA1;EFNA1	S_Shore	++++	4.3513e-54	++-+	1	0	0	0
cg09068086	2	110970204	NCRNA00116	Island	----	4.38081e-54	--+-	1	0	0	1
[truncated: 19,575 more rows]

## Sheet: Legend
CpG probe	CpG probe from Illumina 450k
CHR	chromosome
MAPINFO	coordinates of the probe in the chromosome
UCSC_REFGENE_NAME	name of the Gene according to UCSC Genome Browser
RELATION_TO_UCSC_CPG_ISLAND	position of the CpG probe according to the CpG island (Island: within the CpG island; N-Shore: shore at the 5’ of the CpG island; S-Shore: shore at the 3’ of the CpG island; N-Shelf: shelf at the 5’ of the CpG island; Shores are defined as the 2000 bp upstream and downstream the CpG islands; Shelves are defined as the regions at 2000-4000 bp upstream and downstream the islands
Direction sex	Direction of the correlation between adjusted beta values and sex in the 4 datasets (+: hypermethylated in males;-: hypomethylated in males); Datasets order: GSE40279, GSE87571, EPIC and GSE55763
Bonferroni corrected p-value sex	p-value resulting from the meta-analysis of the correlation between adjusted beta values and sex in the 4 datasets, after Bonferroni correction
Direction age	Direction of the correlation between adjusted beta values and age in the 4 datasets (+: hypermethylated with age;-: hypomethylated with age); Datasets order: GSE40279, GSE87571, EPIC and GSE55763
Bonferroni corrected p-value age	p-value resulting from the meta-analysis of the correlation between adjusted beta values and age in the 4 datasets, after Bonferroni correction
sDMP in Inoshita et al., 2015	1: the probe was reported as differentially methylated between males and females in Inoshita et al., 2015
sDMP in Singmann et al., 2015	1: the probe was reported as differentially methylated between males and females in Singmann et al., 2015
sDMP in Yousefi et al., 2015	1: the probe was reported as differentially methylated between males and females in Yousefi et al., 2015
age-by-sex interaction in McCartnery et al., 2020 (Table S4)	1: the probe was reported to have an age-by-sex interaction in McCartney et al., 2020
Significant sex-age interaction (Supplementary File 3)	1: the probe was reported to have an age-by-sexin this study
