# Supplementary material for: Age-related DNA methylation changes are sex-specific: a comprehensive assessment
Source: Aging (Albany NY). 2020 Dec 3;12(23):24057–80. doi: 10.18632/aging.202251 (PMC7762479; doi:10.18632/aging.202251)
Supplement: Supplementary File 7 [file aging-12-202251-s009.xlsx]

## Sheet: FIGN
Estrogen receptors
SimpleQueryForm{omicsType='Transcriptomic', geneSearchType='gene', gene='FIGN', psId='null', organ='null', tissue='null', species='Human', pathwayCategory='family', doi='null', familyId='8144', minScore=null, maxScore=null, significance=0.05, direction='any', foldChange=2.0, foldChangeMin=2.0, foldChangeMax=30.0, isRange=true}
Experiment Name	Species	Tissue	Probe	Symbol	Fold Change	P-value	BSM
BPA vs Veh | 1 µM, 48 h	Human	endometrium, epithelium, Ishikawa cells	238964_at	FIGN	-2.03218	1.272e-07	BPA
ERα/ESR1 KD vs WT	Human	epithelium, MCF-7 cells	242828_at	FIGN	4.80065	3e-10
17BE2 vs Veh | 100 nM, 40 min	Human	epithelium, MCF-7 cells	NM_018086	FIGN	-2.1675	0.00769106	17BE2
ERα/ESR1 KD vs WT	Human	epithelium, MCF-7 cells	239710_at	FIGN	4.25155	7e-10
BPA vs Veh | 10 µM, 2 w	Human	epithelium, MCF-10F cells	242828_at	FIGN	2.06517	2.9448e-06	BPA
FULV vs Veh (17BE2)	Human	epithelium, MCF-7 cells	242828_at	FIGN	-2.12948	0	FULV
ERα/ESR1 KD vs WT	Human	epithelium, MCF-7 cells	222956_at	FIGN	2.32792	3.52e-08
17BE2 vs Veh	Human	whole vagina	239710_at	FIGN	-2.13423	0.0161556	17BE2
ERα/ESR1 KD vs WT	Human	epithelium, MCF-7 cells	238964_at	FIGN	3.9716	4.9e-09
Androgen receptors
SimpleQueryForm{omicsType='Transcriptomic', geneSearchType='gene', gene='FIGN', psId='null', organ='null', tissue='null', species='Human', pathwayCategory='family', doi='null', familyId='8129', minScore=null, maxScore=null, significance=0.05, direction='any', foldChange=2.0, foldChangeMin=2.0, foldChangeMax=30.0, isRange=true}
Experiment Name	Species	Tissue	Probe	Symbol	Fold Change	P-value	BSM
AR KD vs NC - LNCaP-abl	Human	epithelium, LNCaP-abl cells	222956_at	FIGN	3.04092	0.0263906
DHT vs Veh	Human	epithelium, LNCaP cells	222956_at	FIGN	-3.45376	0.0205698	DHT
FLUT vs Veh - 50 μM, 8 h	Human	hepatocytes, 1° cells	242828_at	FIGN	-2.23438	3.16e-07	FLUT

## Sheet: DOC2A
Estrogen receptors
SimpleQueryForm{omicsType='Transcriptomic', geneSearchType='gene', gene='DOC2A', psId='null', organ='null', tissue='null', species='Human', pathwayCategory='family', doi='null', familyId='8144', minScore=null, maxScore=null, significance=0.05, direction='any', foldChange=2.0, foldChangeMin=2.0, foldChangeMax=30.0, isRange=true}
Experiment Name	Species	Tissue	Probe	Symbol	Fold Change	P-value	BSM
BPA vs Veh | 10 nM, 24 h	Human	endometrium, epithelium, Ishikawa cells	205744_at	DOC2A	-3.07137	0.0219249	BPA
16KE2 vs Veh	Human	myeloid lineage, promyelocytes, APL, HL-60 cells	205744_at	DOC2A	-2.30052	0.017188	16KE2
Androgen receptors
SimpleQueryForm{omicsType='Transcriptomic', geneSearchType='gene', gene='DOC2A', psId='null', organ='null', tissue='null', species='Human', pathwayCategory='family', doi='null', familyId='8129', minScore=null, maxScore=null, significance=0.05, direction='any', foldChange=2.0, foldChangeMin=2.0, foldChangeMax=30.0, isRange=true}
Experiment Name	Species	Tissue	Probe	Symbol	Fold Change	P-value	BSM
AR KD vs NC	Human	epithelium, LNCaP-LP50 cells	205744_at	DOC2A	-3.38003	0.0358444
AR KD vs NC - LNCaP-abl	Human	epithelium, LNCaP-abl cells	205744_at	DOC2A	3.52525	0.0444598

## Sheet: PEX10
Estrogen receptors
SimpleQueryForm{omicsType='Transcriptomic', geneSearchType='gene', gene='PEX10', psId='null', organ='null', tissue='null', species='Human', pathwayCategory='family', doi='null', familyId='8144', minScore=null, maxScore=null, significance=0.05, direction='any', foldChange=2.0, foldChangeMin=2.0, foldChangeMax=30.0, isRange=true}
Experiment Name	Species	Tissue	Probe	Symbol	Fold Change	P-value	BSM
17BE2 vs Veh | 10 nM, 2 h - MCF-7 cells	Human	epithelium, MCF-7 cells	206351_s_at	PEX10	-2.04245	0.0432496	17BE2
17BE2 vs Veh | 10 nM, 12 h	Human	osteoblasts, U2OS cells	206352_s_at	PEX10	3.377	0.049	17BE2
16KE2 vs Veh	Human	myeloid lineage, promyelocytes, APL, HL-60 cells	206352_s_at	PEX10	-2.48611	0.0210856	16KE2
16KE2 vs Veh	Human	myeloid lineage, promyelocytes, APL, HL-60 cells	206351_s_at	PEX10	-4.28351	0.0208053	16KE2
17BE2 vs Veh | 10 nM, 3 h	Human	osteoblasts, U2OS cells	206352_s_at	PEX10	5.064	0.049	17BE2
Androgen receptors
SimpleQueryForm{omicsType='Transcriptomic', geneSearchType='gene', gene='PEX10', psId='null', organ='null', tissue='null', species='Human', pathwayCategory='family', doi='null', familyId='8129', minScore=null, maxScore=null, significance=0.05, direction='any', foldChange=2.0, foldChangeMin=2.0, foldChangeMax=30.0, isRange=true}
Experiment Name	Species	Tissue	Probe	Symbol	Fold Change	P-value	BSM
R1881 vs Veh (HDAC1 KD)	Human	epithelium, LNCaP cells	206351_s_at	PEX10	2.37518	0.00073396	R1881
ELK1 KD + R1881 vs Veh	Human	epithelium, LNCaP cells	206351_s_at	PEX10	3.56576	0.000228644	R1881
ELK1 KD + R1881 vs Veh	Human	epithelium, LNCaP cells	206351_s_at	PEX10	3.56576	0.000228644	R1881
AR KD vs NC	Human	epithelium, LNCaP-LP50 cells	206352_s_at	PEX10	-3.06645	0.00207954
AR KD vs NC	Human	epithelium, LNCaP-LP50 cells	206351_s_at	PEX10	-2.63444	0.000798217
DHT vs Veh | 1 nM, 24 h	Human	epithelium, LNCaP cells	206351_s_at	PEX10	5.41515	7e-05	DHT
ELK1 KD + R1881 vs Veh	Human	epithelium, LNCaP cells	206352_s_at	PEX10	6.19299	7.2319e-06	R1881
ELK1 KD + R1881 vs Veh	Human	epithelium, LNCaP cells	206352_s_at	PEX10	6.19299	7.2319e-06	R1881
R1881 vs Veh	Human	epithelium, LNCaP cells	206351_s_at	PEX10	3.40513	5.32e-08	R1881
R1881 vs Veh - 24 h	Human	epithelium, LNCaP cells	ILMN_1760933	PEX10	2.76063	4.39e-08	R1881
R1881 vs Veh	Human	epithelium, LNCaP cells	206351_s_at	PEX10	2.67922	0.00077467	R1881
R1881 vs Veh	Human	epithelium, LNCaP cells	206351_s_at	PEX10	5.02707	2.47e-08	R1881
DHT vs Veh | 30 nM, 24 h	Human	epithelium, LNCaP cells	206352_s_at	PEX10	2.62079	0	DHT
R1881 vs Veh	Human	epithelium, LNCaP cells	206352_s_at	PEX10	3.24112	5.31e-08	R1881
R1881 vs Veh	Human	epithelium, LNCaP cells	206352_s_at	PEX10	4.06041	0	R1881
DHT vs Veh | 30 nM, 24 h	Human	epithelium, LNCaP cells	206351_s_at	PEX10	2.41999	2e-05	DHT
R1881 vs Veh	Human	epithelium, LNCaP cells	206352_s_at	PEX10	3.93308	3.04955e-05	R1881
R1881 vs Veh (UXT KD)	Human	epithelium, LNCaP cells	206352_s_at	PEX10	3.31408	4.44e-08	R1881
R1881 vs Veh (UXT KD)	Human	epithelium, LNCaP cells	206351_s_at	PEX10	3.19996	8.74e-08	R1881
R1881 vs Veh	Human	epithelium, LNCaP cells	206352_s_at	PEX10	2.73291	2.525e-07	R1881
DHT vs Veh	Human	epithelium, LNCaP cells	206352_s_at	PEX10	2.23966	0.00566393	DHT
R1881 vs Veh	Human	epithelium, LNCaP cells	206351_s_at	PEX10	2.63958	0.000121464	R1881
DHT vs Veh | 10 nM, 24 h	Human	epithelium, LNCaP cells	206351_s_at	PEX10	2.17071	0.0176826	DHT
AR KD vs NC - LNCaP	Human	epithelium, LNCaP cells	206351_s_at	PEX10	-2.18274	0.0204067
DHT vs Veh | 1 nM, 24 h	Human	epithelium, LNCaP cells	206352_s_at	PEX10	4.55989	2e-05	DHT
DHT vs Veh | 30 nM, 24 h	Human	epithelium, LNCaP cells	206351_s_at	PEX10	5.01066	9e-05	DHT
DHT vs Veh | 30 nM, 24 h	Human	epithelium, LNCaP cells	206352_s_at	PEX10	4.69785	2e-05	DHT

## Sheet: PRR4
Estrogen receptors
SimpleQueryForm{omicsType='Transcriptomic', geneSearchType='gene', gene='PRR4', psId='null', organ='null', tissue='null', species='Human', pathwayCategory='family', doi='null', familyId='8144', minScore=null, maxScore=null, significance=0.05, direction='any', foldChange=2.0, foldChangeMin=2.0, foldChangeMax=30.0, isRange=true}
Experiment Name	Species	Tissue	Probe	Symbol	Fold Change	P-value	BSM
BPA vs Veh | 10 nM, 8 h	Human	endometrium, epithelium, Ishikawa cells	243389_at	PRR4	2.72439	0.0486216	BPA
Androgen receptors
SimpleQueryForm{omicsType='Transcriptomic', geneSearchType='gene', gene='PRR4', psId='null', organ='null', tissue='null', species='Human', pathwayCategory='family', doi='null', familyId='8129', minScore=null, maxScore=null, significance=0.05, direction='any', foldChange=2.0, foldChangeMin=2.0, foldChangeMax=30.0, isRange=true}
Experiment Name	Species	Tissue	Probe	Symbol	Fold Change	P-value	BSM
R1881 vs Veh	Human	epithelium, LNCaP cells	204919_at	PRR4	-2.44289	0.00873086	R1881
