# Supplementary material for: Age-related DNA methylation changes are sex-specific: a comprehensive assessment
Source: Aging (Albany NY). 2020 Dec 3;12(23):24057–80. doi: 10.18632/aging.202251 (PMC7762479; doi:10.18632/aging.202251)
Supplement: Supplementary Tables [file aging-12-202251-s002.pdf]

## SUPPLEMENTARY TABLES

**Supplementary Table 1. Age-by-sex interaction in the number of epimutations and in the values of Shannon entropy. ANCOVA p-values are reported for age, sex and age-by-sex interaction effects.**

|          | Epimutations |            |            | Entropy    |            |            |
|----------|--------------|------------|------------|------------|------------|------------|
|          | age          | sex        | age:sex    | age        | sex        | age:sex    |
| GSE40279 | 6.8093E-08   | 4.8010E-01 | 5.1342E-01 | 7.7160E-01 | 7.7393E-02 | 3.6785E-01 |
| GSE87571 | 9.1517E-20   | 9.4685E-01 | 7.2585E-01 | 1.4711E-17 | 1.3101E-01 | 4.7210E-01 |
| EPIC     | 1.6369E-08   | 5.8827E-02 | 8.0821E-02 | 1.3407E-04 | 4.8294E-05 | 1.0310E-04 |
| GSE55763 | 1.0350E-15   | 4.9039E-02 | 2.6199E-02 | 3.4323E-09 | 3.2372E-01 | 1.9585E-01 |

**Supplementary Table 2. Characteristics of the Infinium450k datasets investigated in the present study.**

|                        | GSE40279                    | GSE87571          | EPIC             | GSE55763                       |
|------------------------|-----------------------------|-------------------|------------------|--------------------------------|
| Number of subjects     | 656                         | 729               | 1803             | 2670                           |
| Number of females      | 338                         | 388               | 1114             | 860                            |
| Number of males        | 318                         | 341               | 689              | 1810                           |
| Age range              | 19–101                      | 14–94             | 34–74            | 35–75                          |
| Ethnic group (Country) | European and Hispanic (USA) | European (Sweden) | European (Italy) | Indian Asian and European (UK) |

**Supplementary Table 3. Characteristics of the samples analyzed by the EpiTYPER assay.**

|         | Healthy controls<br>n=419 | Centenarians<br>n=49  | Centenarians' offspring<br>n=48 | Down syndrome<br>n=44 |
|---------|---------------------------|-----------------------|---------------------------------|-----------------------|
| Males   | n=198<br>25-98 years      | n=15<br>100-105 years | n=15<br>58-84 years             | n=25<br>22-63 years   |
| Females | n=221<br>23-98 years      | n=34<br>100-112 years | n=33<br>55-89 years             | n=19<br>19-66 years   |

## Supplementary Files

**Supplementary File 1.** Lists of sex- and age-associated differentially methylated positions (saDMPs) and of sex- but not age-associated differentially methylated positions (snaDMPs) resulting from the meta-analysis.

**Supplementary File 2.** Gene Ontology enrichment of saDMPs and snaDMPs lists.

**Supplementary File 3.** Probes with significant age-by-sex interaction resulting from the meta-analysis.

**Supplementary File 4.** Results of the statistical analyses performed on EpiTYPER data on centenarians', centenarians' offspring and Down syndrome cohorts.

**Supplementary File 5.** Lists of sex-specific age-associated variably methylated positions (saVMPs).

**Supplementary File 6.** Gene Ontology enrichment of saVMPs lists.

**Supplementary File 7.** Results of “Ominer” tool for *FIGN*, *DOC2A*, *PEX10* and *PRR4* genes.

**Supplementary File 8.** Imprinted regions and sex hormones-related genes considered for enrichment analysis.
